# Supplementary material for: Structure-Based and Molecular Modeling Studies for the Discovery of Cyclic Imides as Reversible Cruzain Inhibitors With Potent Anti-Trypanosoma cruzi Activity
Source: PubMed Central journal article supplement (PMC6886403; doi:10.3389/fchem.2019.00798), 2019-11-25
Supplement: Image_1.pdf [file Image_1.pdf]

## Supporting Information

### **Structure-Based and Molecular Modeling Studies for the Discovery of Cyclic Imides as Reversible Cruzain Inhibitors with Potent Anti-*Trypanosoma cruzi* Activity**

Rafael A. A. Ferreira,<sup>a+</sup> Ivani Pauli,<sup>b+</sup> Thiago S. Sampaio,<sup>a</sup> Mariana L. de Souza,<sup>b</sup> Leonardo L. G. Ferreira,<sup>b</sup> Luma G. Magalhães,<sup>b</sup> Celso de O. Resende Jr,<sup>a</sup> Rafaela S. Ferreira,<sup>c</sup> Renata Krogh,<sup>b</sup> Luiz C. Dias,<sup>a\*</sup> Adriano D. Andricopulo<sup>b\*</sup>

#### **Affiliation**

<sup>a</sup>Instituto de Química, Universidade Estadual de Campinas, 6154, Campinas, SP, Brazil

<sup>b</sup>Laboratório de Química Medicinal e Computacional, Centro de Pesquisa e Inovação em Biodiversidade e Fármacos, Instituto de Física de São Carlos, Universidade de São Paulo, São Carlos, SP, Brazil

<sup>c</sup>Departamento de Bioquímica e Imunologia, Universidade Federal de Minas Gerais, Belo Horizonte, MG, Brazil

#### **Correspondence**

Adriano D. Andricopulo: [aandrico@ifsc.usp.br](mailto:aandrico@ifsc.usp.br)

Luiz Carlos Dias: [ldias@unicamp.br](mailto:ldias@unicamp.br)

+ These authors contributed equally to this work

#### **Table of contents:**

|                              |           |
|------------------------------|-----------|
| <b>Supplementary Figures</b> | <b>S1</b> |
| <b>NMR Spectra</b>           | <b>S5</b> |

## Supplementary Figures

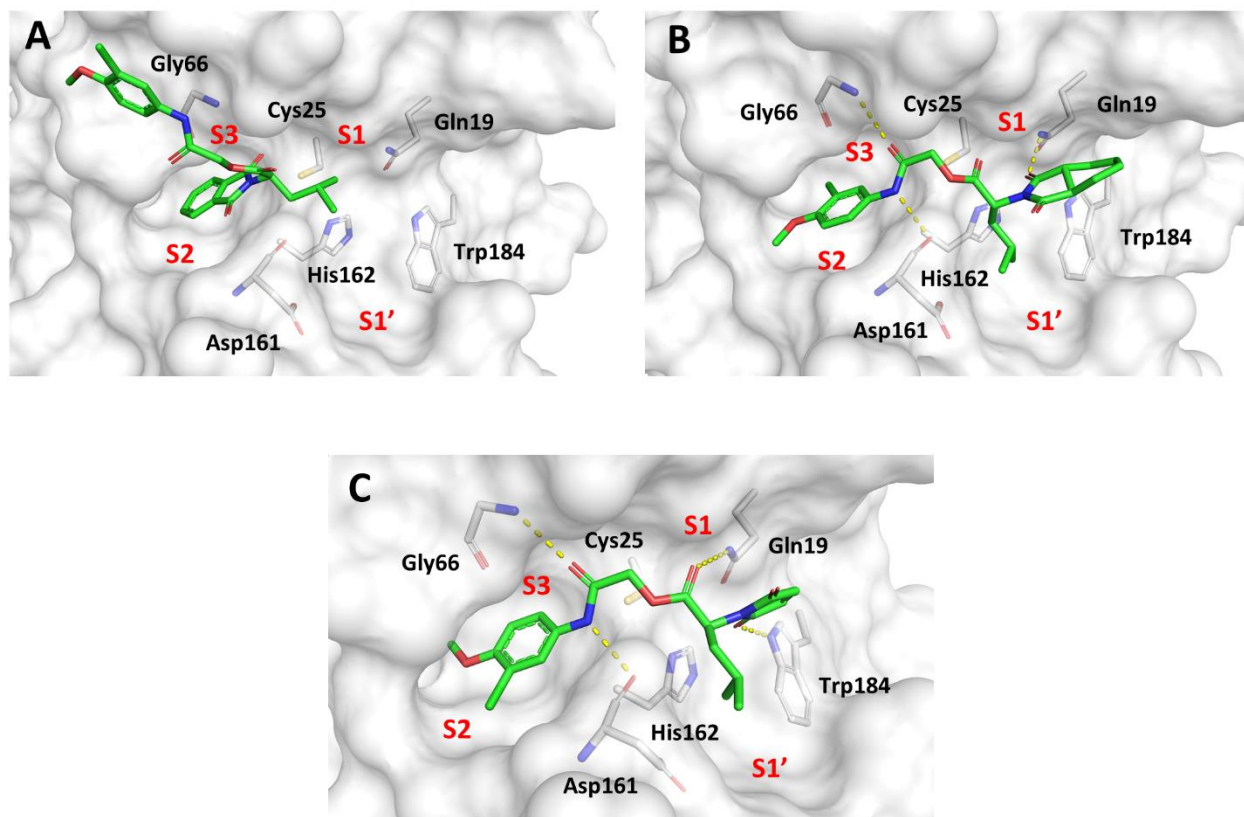

**Figure S1.** Molecular docking predicted binding mode of imide derivatives within the active site of cruzain. **(A)** Compound 10a. **(B)** Compound 10b. **(C)** Compound 10c. Cruzain (PDB 3KKU, 1.28 Å) is depicted in surface representation. Binding site residues (carbon in gray) and inhibitors (carbon in green) are shown as sticks. Hydrogen bonds are shown as dashed lines. Cruzain subsites are labeled as S1, S1', S2 and S3.

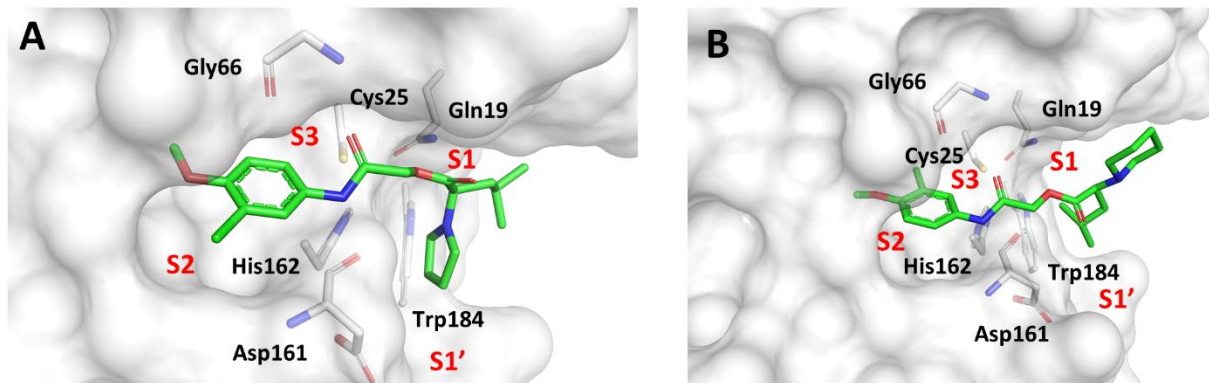

**Figure S2.** Molecular docking predicted binding mode of imide derivatives within the active site of cruzain. **(A)** Compound **10k**. **(B)** Compound **10l**. Cruzain (PDB 3KKU, 1.28 Å) is depicted in surface representation. Binding site residues (carbon in gray) and inhibitors (carbon in green) are shown as sticks. Hydrogen bonds are shown as dashed lines. Cruzain subsites are labeled as S1, S1', S2 and S3.

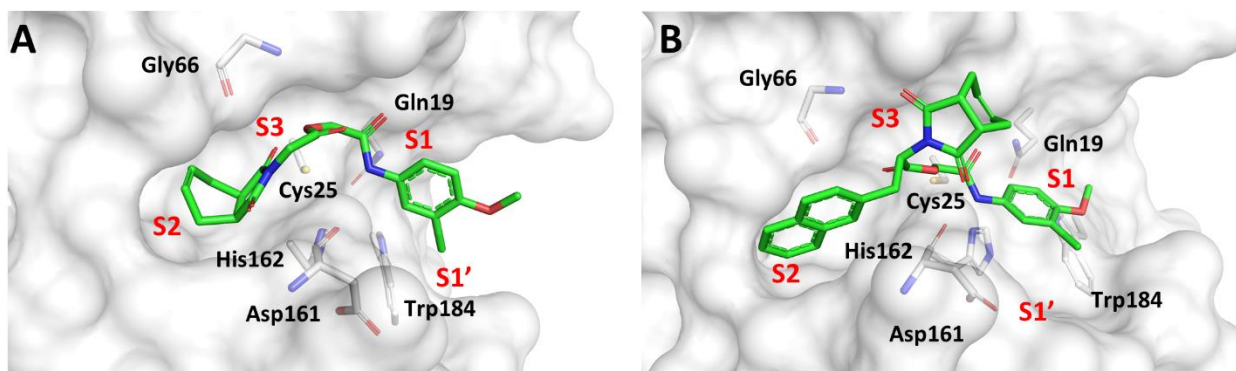

**Figure S3.** Molecular docking predicted binding mode of imide derivatives within the active site of cruzain. **(A)** Compound **10g**. **(B)** Compound **10i**. Cruzain (PDB 3KKU, 1.28 Å) is depicted in surface representation. Binding site residues (carbon in gray) and inhibitors (carbon in green) are shown as sticks. Hydrogen bonds are shown as dashed lines. Cruzain subsites are labeled as S1, S1', S2 and S3.

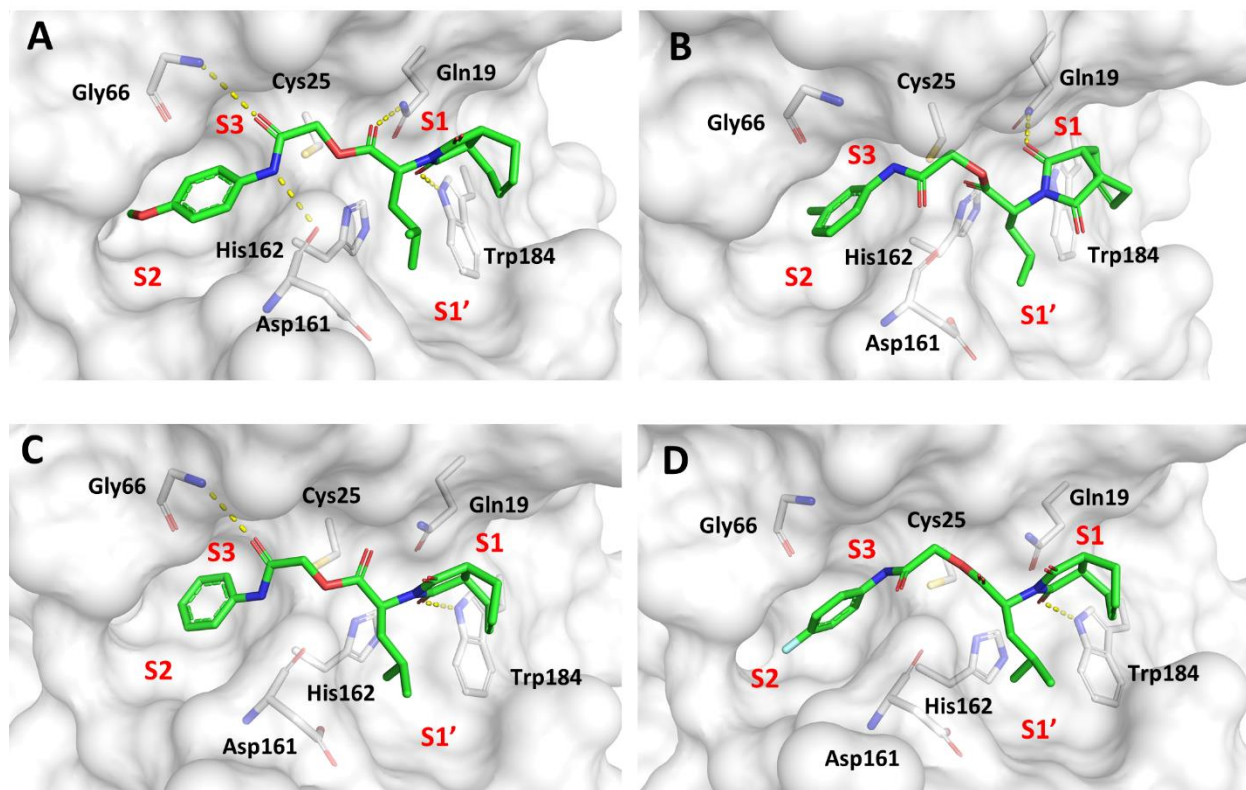

**Figure S4.** Molecular docking predicted binding mode of imide derivatives within the active site of cruzain. **(A)** Compound **3b**. **(B)** Compound **3c**. **(C)** Compound **3d** **(D)** Compound **3e**. Cruzain (PDB 3KKU, 1.28 Å) is depicted in surface representation. Binding site residues (carbon in gray) and inhibitors (carbon in green) are shown as sticks. Hydrogen bonds are shown as dashed lines. Cruzain subsites are labeled as S1, S1', S2 and S3.

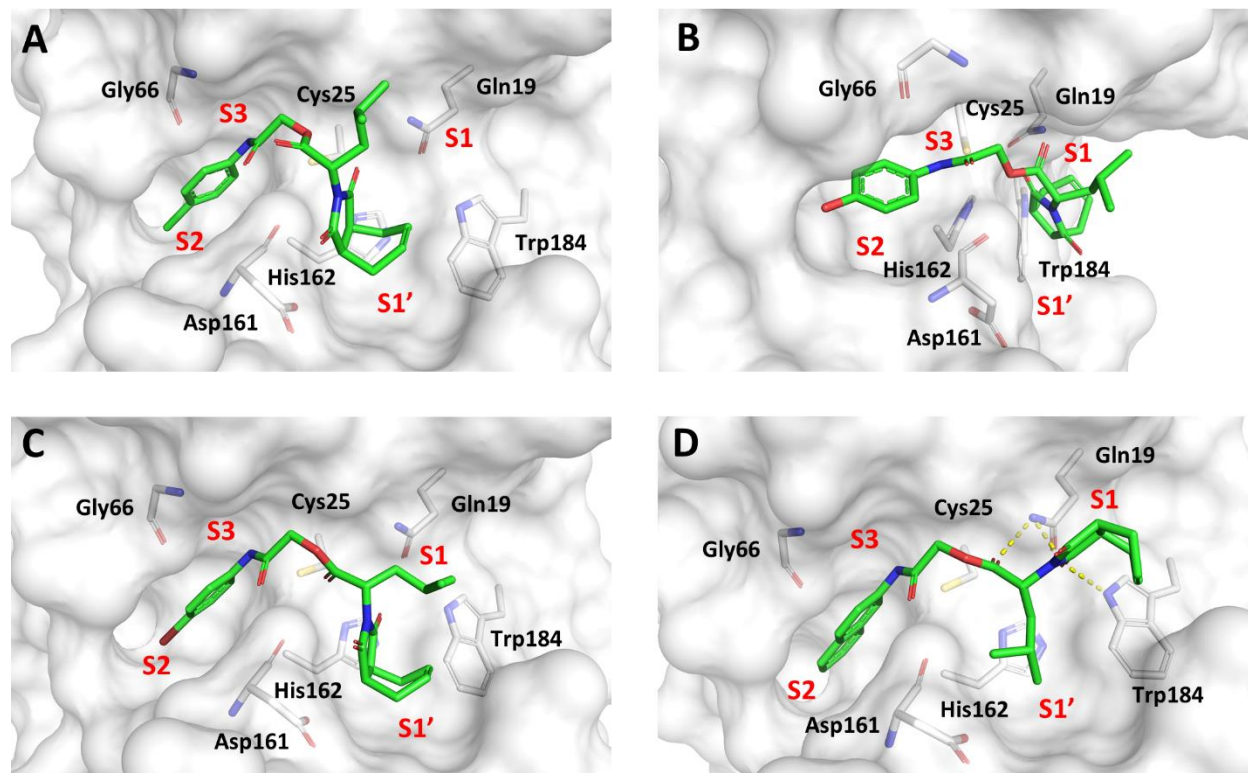

**Figure S5.** Molecular docking predicted binding mode of imide derivatives within the active site of cruzain. **(A)** Compound **3g**. **(B)** Compound **3h**. **(C)** Compound **3f**. **(D)** Compound **3i**. Cruzain (PDB 3KKU, 1.28 Å) is depicted in surface representation. Binding site residues (carbon in gray) and inhibitors (carbon in green) are shown as sticks. Hydrogen bonds are shown as dashed lines. Cruzain subsites are labeled as S1, S1', S2 and S3.

# NMR Spectra

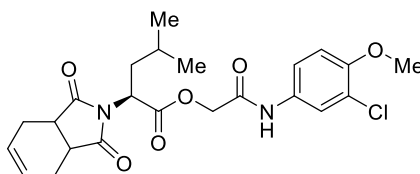

|                        |                                                          |                       |                                                             |                        |                      |
|------------------------|----------------------------------------------------------|-----------------------|-------------------------------------------------------------|------------------------|----------------------|
| Acquisition Time (sec) | 1.5903                                                   | Comment               | Rafael - RAF 105 - CDCl3 - Avance 500 MHz - set02rafH1 - 1H | Date                   | 02 Sep 2015 07:37:18 |
| File Name              | E:\RMN Dissert\500 MHz\Set 15\set02rafH1 RAF 105_001001r | Frequency (MHz)       | 499.87                                                      | Nucleus                | 1H                   |
| Number of Transients   | 16                                                       | Original Points Count | 16384                                                       | Points Count           | 65536                |
| Solvent                | CHLOROFORM-D                                             | Sweep Width (Hz)      | 10302.20                                                    | Temperature (degree C) | 25.150               |

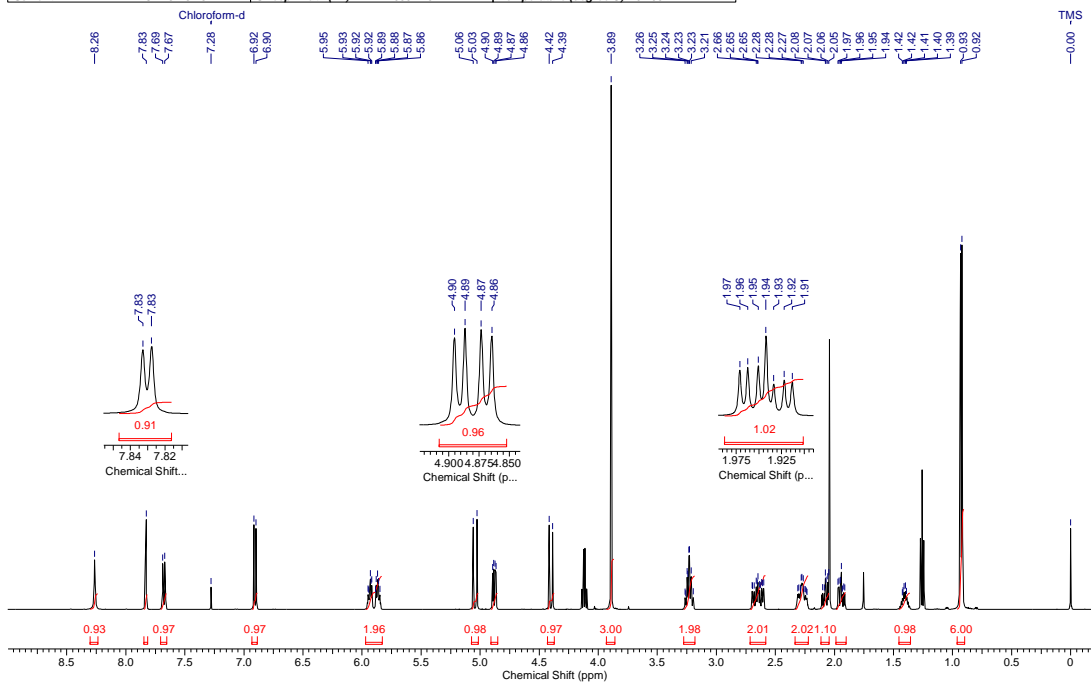

Figure S6 <sup>1</sup>H NMR spectrum of compound **3a** (500 MHz, CDCl<sub>3</sub>).

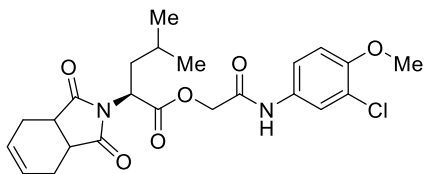

|                        |                                                          |                       |                                                              |                        |                      |
|------------------------|----------------------------------------------------------|-----------------------|--------------------------------------------------------------|------------------------|----------------------|
| Acquisition Time (sec) | 0.4981                                                   | Comment               | Rafael - RAF 105 - CDCl3 - Avance 500 MHz - set02rafH1 - 13C | Date                   | 02 Sep 2015 07:41:38 |
| File Name              | E:\RMN Dissert\500 MHz\Set 15\set02rafH1 RAF 105_002001r | Frequency (MHz)       | 125.69                                                       | Nucleus                | 13C                  |
| Number of Transients   | 128                                                      | Original Points Count | 16384                                                        | Points Count           | 32768                |
| Solvent                | CHLOROFORM-D                                             | Sweep Width (Hz)      | 32894.74                                                     | Temperature (degree C) | 25.211               |

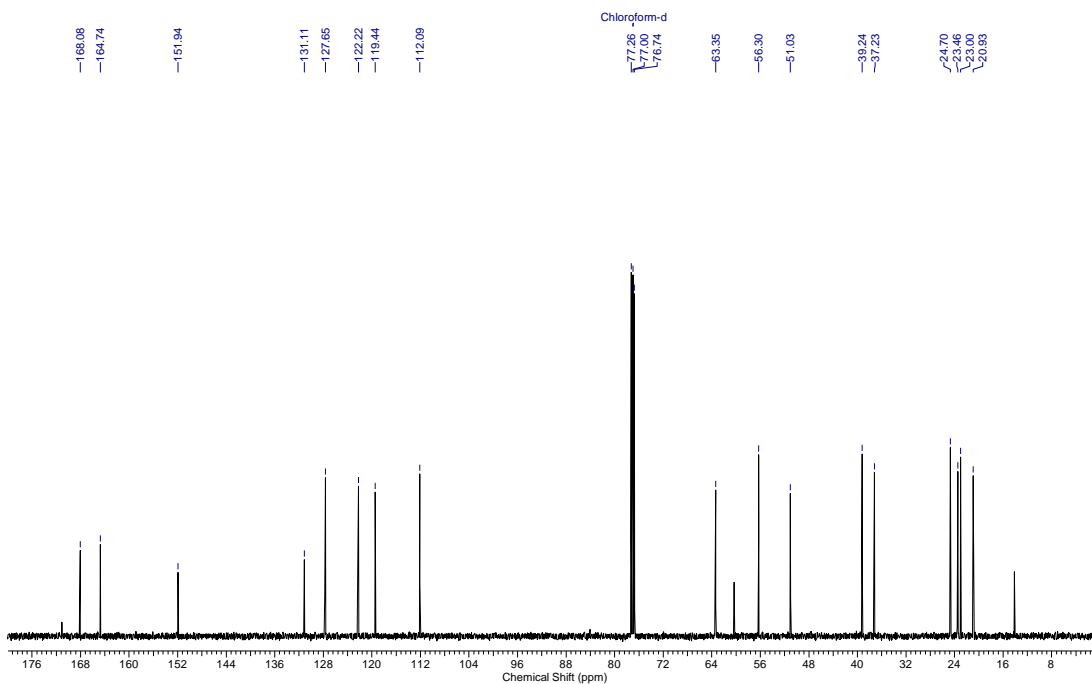

Figure S7  $^{13}\text{C}$  NMR spectrum of compound **3a** (125 MHz,  $\text{CDCl}_3$ ).



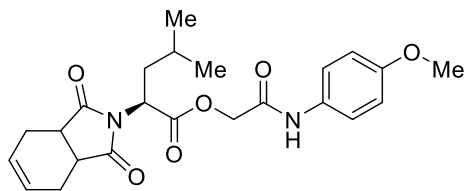

|                        |                      |                   |                                                                          |                        |                      |
|------------------------|----------------------|-------------------|--------------------------------------------------------------------------|------------------------|----------------------|
| Acquisition Time (sec) | 3.1654               | Comment           | Thiago TSS-027 DMSO-d6 250 MHz set20tssH4                                | Date                   | 20 Sep 2012 19:53:52 |
| Date Stamp             | 20 Sep 2012 19:53:52 | File Name         | C:\USERS\RAFAEL\DESKTOP\ESPECTROS TSS\250 - 2012\SET20TSSH4(1\PDAT)\111R | Origin                 | spect                |
| Frequency (MHz)        | 250.13               | Nucleus           | 1H                                                                       | Number of Transients   | 16                   |
| Original Points Count  | 16384                | Owner             | root                                                                     | Points Count           | 32768                |
| Receiver Gain          | 456.10               | SW(cyclical) (Hz) | 5175.98                                                                  | Solvent                | DMSO-d6              |
| Spectrum Type          | STANDARD             | Sweep Width (Hz)  | 5175.83                                                                  | Temperature (degree C) | 25.160               |
|                        |                      |                   |                                                                          | Spectrum Offset (Hz)   | 1755.9128            |

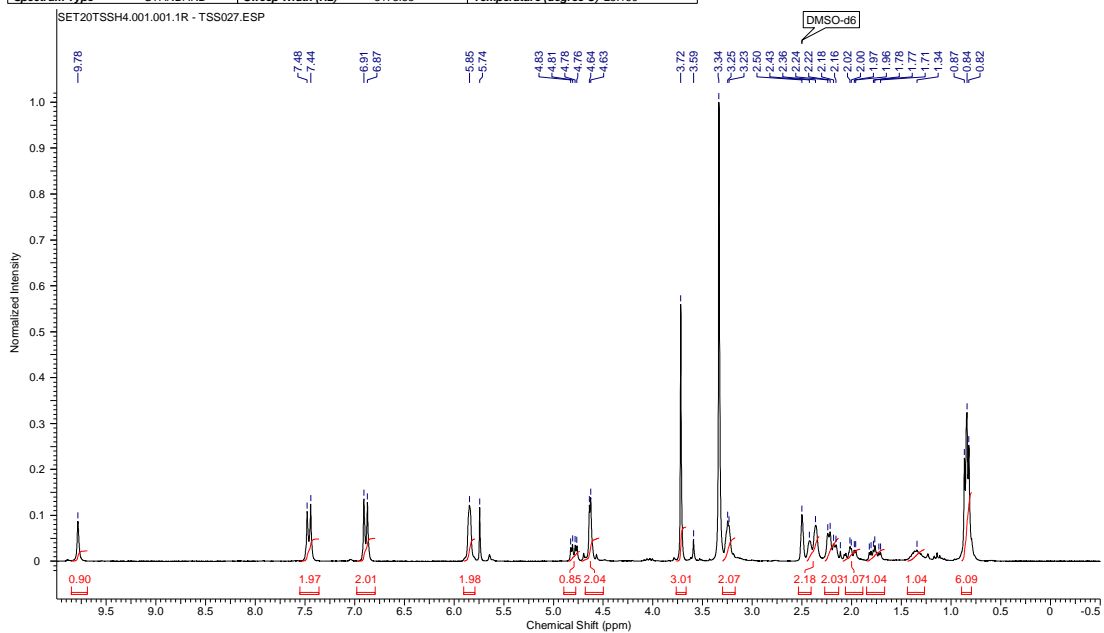

Figure S8 <sup>1</sup>H NMR spectrum of compound **3b** (250 MHz, DMSO).



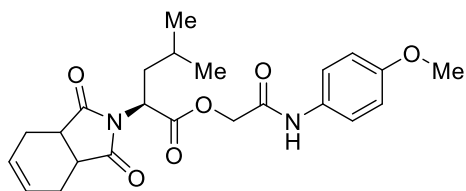

|                        |                      |                      |                                               |                        |                                                                          |
|------------------------|----------------------|----------------------|-----------------------------------------------|------------------------|--------------------------------------------------------------------------|
| Acquisition Time (sec) | 0.5439               | Comment              | Thiago TSS-027 DMSO-d6 250 MHz set20tssC4 13C | Date                   | 20 Sep 2012 20:17:20                                                     |
| Date Stamp             | 20 Sep 2012 20:17:20 | Nucleus              | 13C                                           | File Name              | C:\USERS\RAFAEL\DESKTOP\ESPECTROS TSS\250 - 2012\SET20TSSC4\2\PDATA\111R |
| Frequency (MHz)        | 62.90                | Number of Transients | 1024                                          | Origin                 | spect                                                                    |
| Original Points Count  | 8192                 | Owner                | root                                          | Points Count           | 32768                                                                    |
| Receiver Gain          | 724.10               | SW(cyclical) (Hz)    | 15060.24                                      | Solvent                | DMSO-d6                                                                  |
| Spectrum Type          | STANDARD             | Sweep Width (Hz)     | 15059.78                                      | Temperature (degree C) | 25.160                                                                   |
|                        |                      |                      |                                               | Pulse Sequence         | zgpg30                                                                   |
|                        |                      |                      |                                               | Spectrum Offset (Hz)   | 6261.3115                                                                |

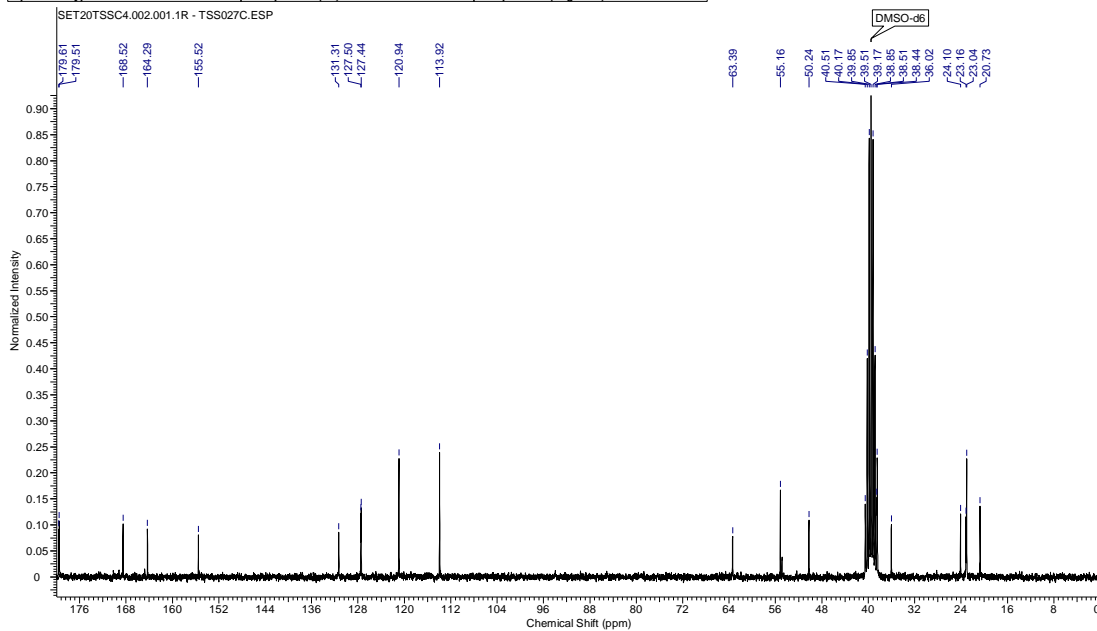

Figure S9  $^{13}\text{C}$  NMR spectrum of compound **3b** (62.5 MHz, DMSO).

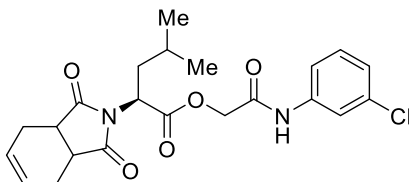

|                        |                      |                   |                                                                        |                        |                      |
|------------------------|----------------------|-------------------|------------------------------------------------------------------------|------------------------|----------------------|
| Acquisition Time (sec) | 3.1654               | Comment           | Thiago DMSO 250mHz TSS-028 set25tssH1                                  | Date                   | 25 Sep 2012 11:13:20 |
| Date Stamp             | 25 Sep 2012 11:13:20 | File Name         | C:\USERS\IRAFEL\DESKTOP\SPECTROS TSS\250 - 2012\SET25TSSH1\1\PDAT\111R | Origin                 | spect                |
| Frequency (MHz)        | 250.13               | Nucleus           | 1H                                                                     | Number of Transients   | 16                   |
| Original Points Count  | 16384                | Owner             | root                                                                   | Points Count           | 32768                |
| Receiver Gain          | 114.00               | SW(cyclical) (Hz) | 5175.98                                                                | Solvent                | DMSO-d6              |
| Spectrum Type          | STANDARD             | Sweep Width (Hz)  | 5175.83                                                                | Temperature (degree C) | 25.160               |
|                        |                      |                   |                                                                        | Pulse Sequence         | zg30                 |
|                        |                      |                   |                                                                        | Spectrum Offset (Hz)   | 1756.0708            |

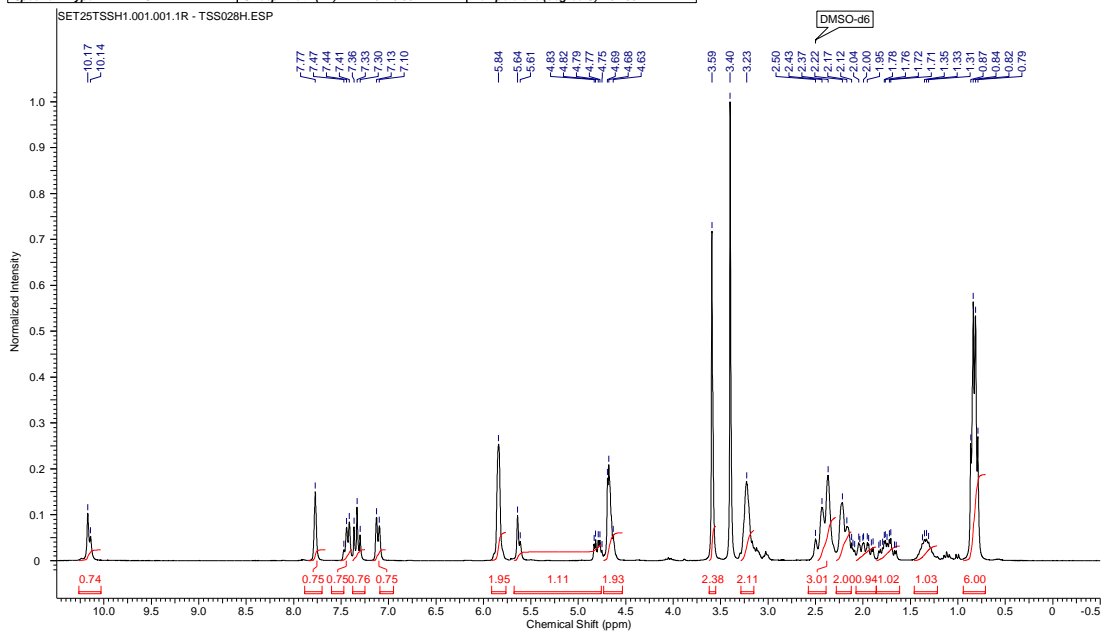

Figure S10  $^1\text{H}$  NMR spectrum of compound **3c** (250 MHz, DMSO).

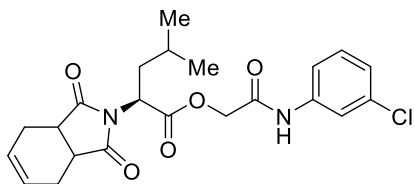

|                        |                      |                   |                                                                          |                        |                      |
|------------------------|----------------------|-------------------|--------------------------------------------------------------------------|------------------------|----------------------|
| Acquisition Time (sec) | 0.5439               | Comment           | Thiago, DMSO, 250mHZ, TSS-028, set25tssC113C                             | Date                   | 25 Sep 2012 12:00:16 |
| Date Stamp             | 25 Sep 2012 12:00:16 | File Name         | C:\USERS\IRAFEL\DESKTOP\ESPECTROS TSS\250 - 2012\SET25TSSC1\2\PDATA\111R |                        |                      |
| Frequency (MHz)        | 62.90                | Nucleus           | 13C                                                                      | Number of Transients   | 1024                 |
| Original Points Count  | 8192                 | Owner             | root                                                                     | Points Count           | 32768                |
| Receiver Gain          | 1448.20              | SW(cyclical) (Hz) | 15060.24                                                                 | Solvent                | DMSO-d6              |
| Spectrum Type          | STANDARD             | Sweep Width (Hz)  | 15059.78                                                                 | Temperature (degree C) | 25.160               |
|                        |                      |                   |                                                                          | Spectrum Offset (Hz)   | 6264.9883            |

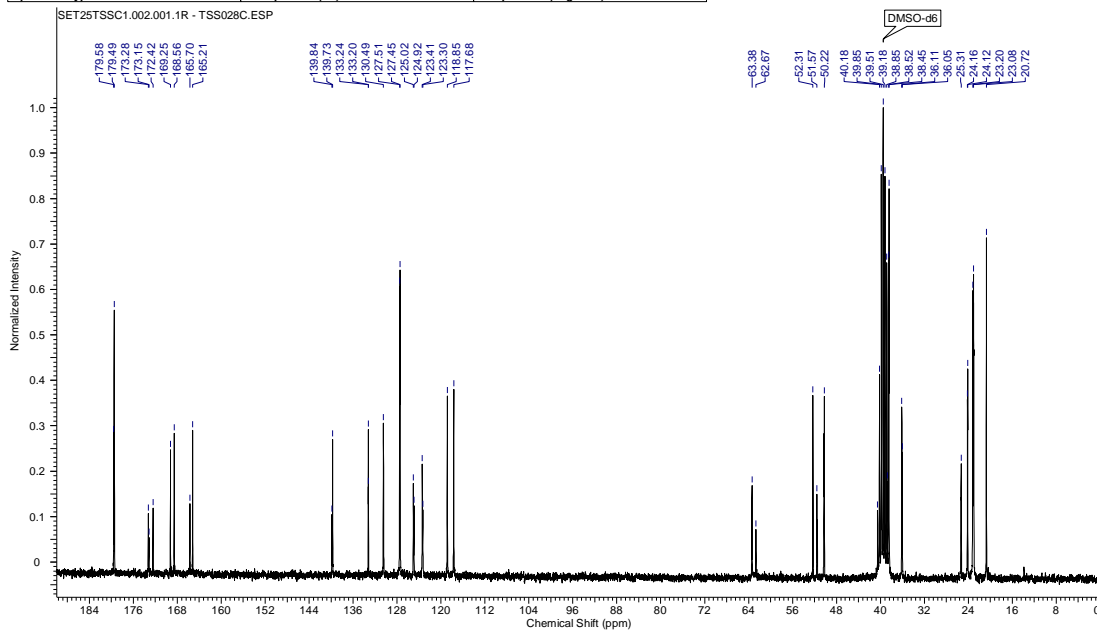

Figure S11 <sup>13</sup>C NMR spectrum of compound 3c (62.5 MHz, DMSO).

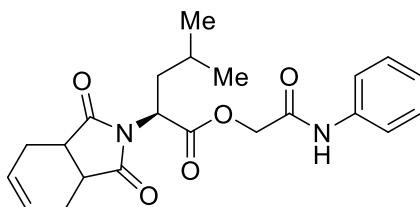

|                        |                      |                   |                                                                          |                        |                      |
|------------------------|----------------------|-------------------|--------------------------------------------------------------------------|------------------------|----------------------|
| Acquisition Time (sec) | 1.9923               | Comment           | Thiago - TSS-085 - dmsol - Avance 400MHz - fev04tssH1                    | Date                   | 04 Feb 2013 12:34:40 |
| Date Stamp             | 04 Feb 2013 12:34:40 | File Name         | C:\USERS\RAFAEL\DESKTOP\ESPECTROS TSS\400 - 2013\FEV04TSSH1\1\PDATA\111R |                        |                      |
| Frequency (MHz)        | 400.18               | Nucleus           | 1H                                                                       | Number of Transients   | 16                   |
| Original Points Count  | 16384                | Owner             | avance                                                                   | Points Count           | 32768                |
| Receiver Gain          | 64.00                | SW(cyclical) (Hz) | 8223.68                                                                  | Solvent                | DMSO-d6              |
| Spectrum Type          | STANDARD             | Sweep Width (Hz)  | 8223.43                                                                  | Temperature (degree C) | 25.160               |
|                        |                      |                   |                                                                          | Pulse Sequence         | zg30                 |
|                        |                      |                   |                                                                          | Spectrum Offset (Hz)   | 2463.7126            |

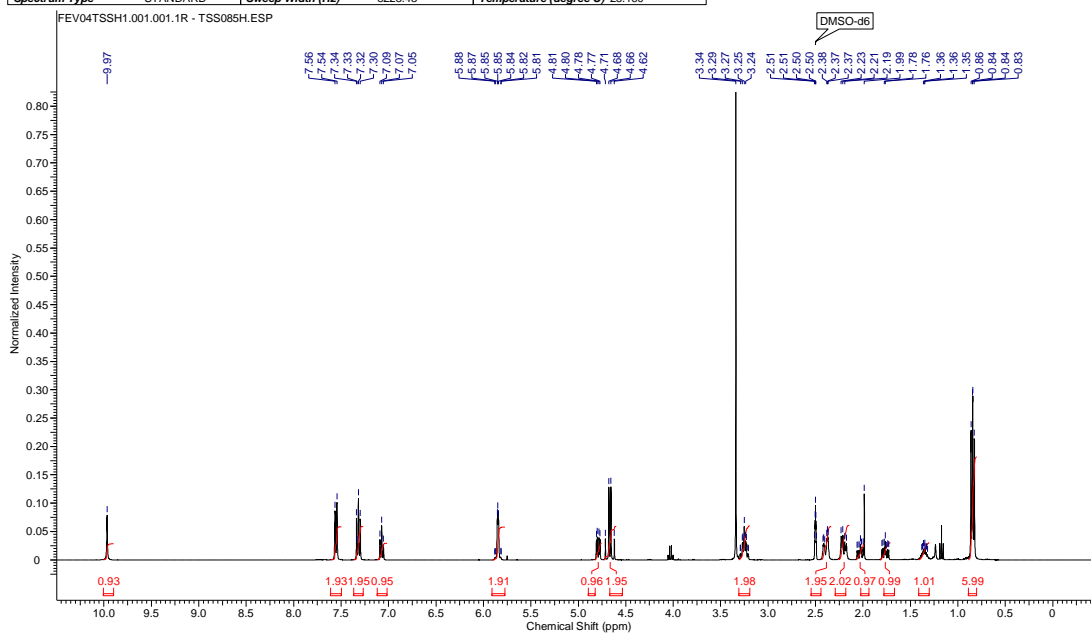

Figure S12  $^1\text{H}$  NMR spectrum of compound 3d (400 MHz, DMSO).

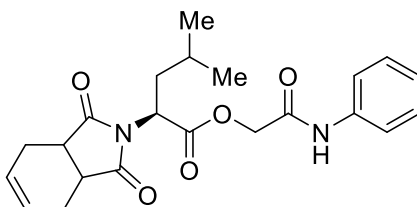

|                        |                      |                   |                                                                         |                        |                      |
|------------------------|----------------------|-------------------|-------------------------------------------------------------------------|------------------------|----------------------|
| Acquisition Time (sec) | 0.6816               | Comment           | Thiago - TSS-085 - dmsc - Avance 400MHz - fev04tssH1 - 13C              | Date                   | 04 Feb 2013 12:58:08 |
| Date Stamp             | 04 Feb 2013 12:58:08 | File Name         | C:\USERS\IRFAEL\DESKTOP\ESPECTROS TSS400 - 2013\FEV04TSSH1\2\PDATA\111R |                        |                      |
| Frequency (MHz)        | 100.63               | Nucleus           | 13C                                                                     | Number of Transients   | 5120                 |
| Original Points Count  | 16384                | Owner             | avance                                                                  | Points Count           | 131072               |
| Receiver Gain          | 203.00               | SW(cyclical) (Hz) | 24038.46                                                                | Solvent                | DMSO-d6              |
| Spectrum Type          | STANDARD             | Sweep Width (Hz)  | 24038.28                                                                | Temperature (degree C) | 25.160               |
|                        |                      |                   |                                                                         | Spectrum Offset (Hz)   | 10012.3740           |

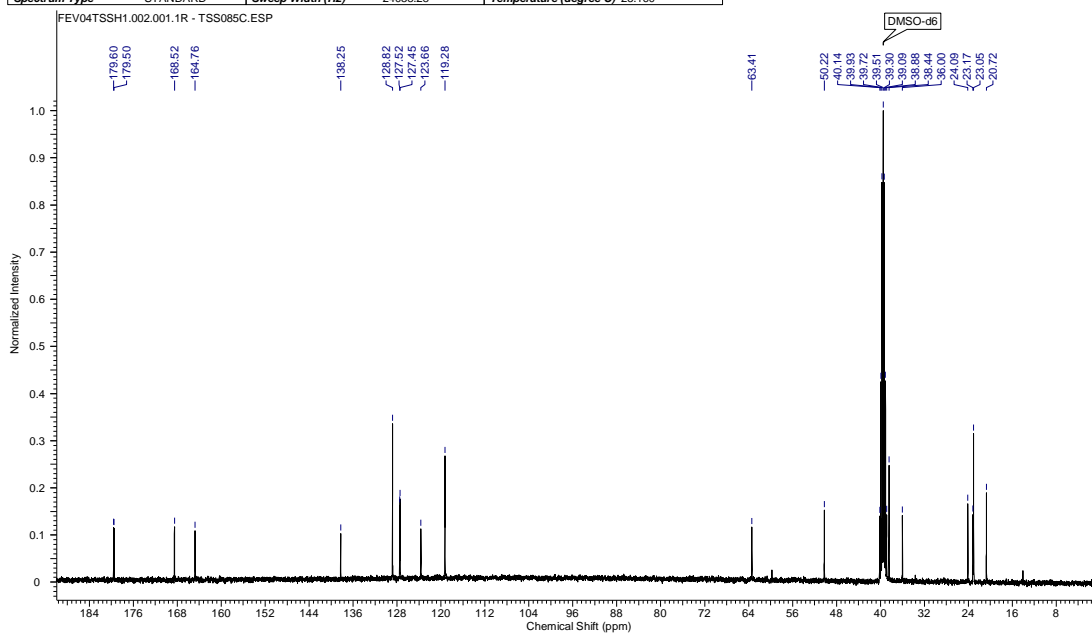

Figure S13  $^{13}\text{C}$  NMR spectrum of compound 3d (100 MHz, DMSO).

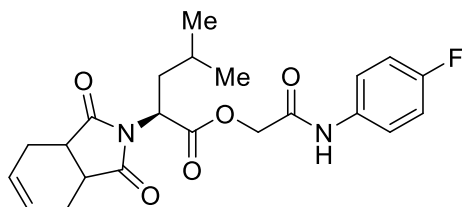

|                        |                      |                   |                                                                         |                        |                      |
|------------------------|----------------------|-------------------|-------------------------------------------------------------------------|------------------------|----------------------|
| Acquisition Time (sec) | 3.1654               | Comment           | Thiago TSS-053 DMSO-d6 250 MHz set27tssH1                               | Date                   | 27 Sep 2012 18:17:52 |
| Date Stamp             | 27 Sep 2012 18:17:52 | File Name         | C:\USERS\IRAFEL\DESKTOP\SPECTROS TSS\250 - 2012\SET27TSSH1\1\PDATA\111R |                        |                      |
| Frequency (MHz)        | 250.13               | Nucleus           | 1H                                                                      | Number of Transients   | 8                    |
| Original Points Count  | 16384                | Owner             | root                                                                    | Points Count           | 32768                |
| Receiver Gain          | 256.00               | SW(cyclical) (Hz) | 5175.98                                                                 | Solvent                | DMSO-d6              |
| Spectrum Type          | STANDARD             | Sweep Width (Hz)  | 5175.83                                                                 | Temperature (degree C) | 25.160               |
|                        |                      |                   |                                                                         | Pulse Sequence         | zg30                 |
|                        |                      |                   |                                                                         | Spectrum Offset (Hz)   | 1756.2288            |

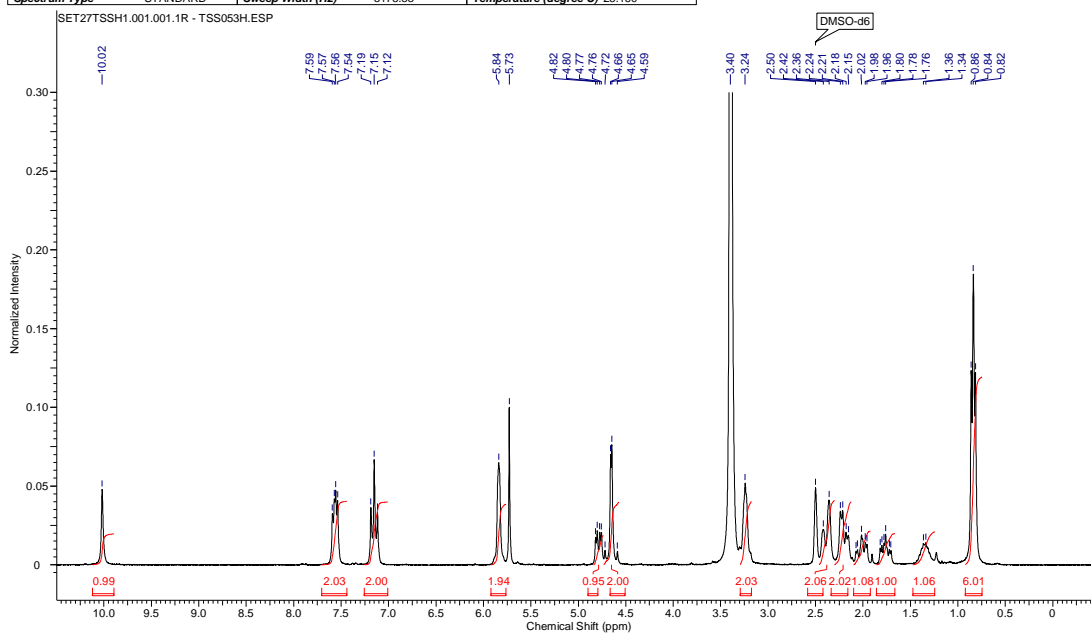

Figure S14 <sup>1</sup>H NMR spectrum of compound 3e (250 MHz, DMSO).

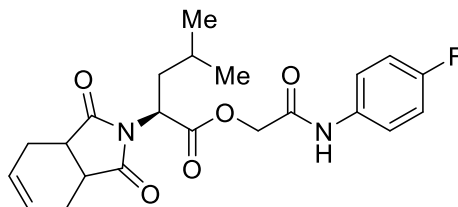

|                        |                      |                   |                                                                  |                        |                      |
|------------------------|----------------------|-------------------|------------------------------------------------------------------|------------------------|----------------------|
| Acquisition Time (sec) | 0.5439               | Comment           | Thiago 250Mhz, DMSO, TSS-053, oct02tssC3                         | Date                   | 02 Oct 2012 12:06:40 |
| Date Stamp             | 02 Oct 2012 12:06:40 | File Name         | C:\USERS\RAFAEL\DESKTOP\SPECTROS TSS\250 - 2012.OCT02TSSC3\1\FID |                        |                      |
| Frequency (MHz)        | 62.90                | Nucleus           | 13C                                                              | Number of Transients   | 2191                 |
| Original Points Count  | 8192                 | Owner             | root                                                             | Points Count           | 8192                 |
| Receiver Gain          | 256.00               | SW(cyclical) (Hz) | 15060.24                                                         | Solvent                | DMSO-d6              |
| Spectrum Type          | STANDARD             | Sweep Width (Hz)  | 15058.40                                                         | Temperature (degree C) | 25.160               |
|                        |                      |                   |                                                                  | Spectrum Offset (Hz)   | 6264.0869            |

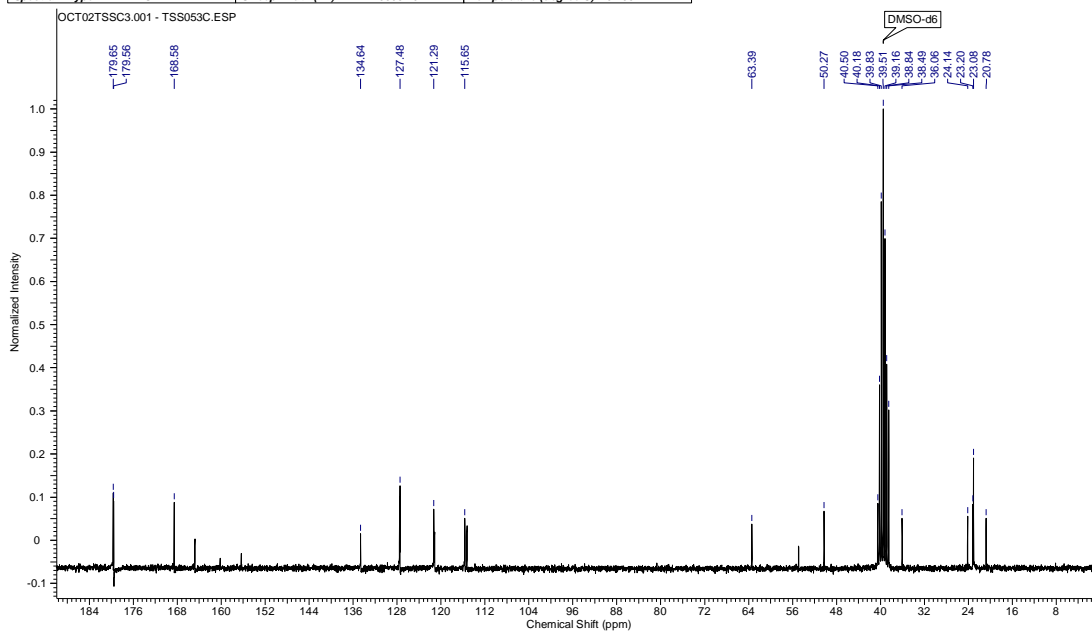

Figure S15  $^{13}\text{C}$  NMR spectrum of compound **3e** (62.5 MHz, DMSO).



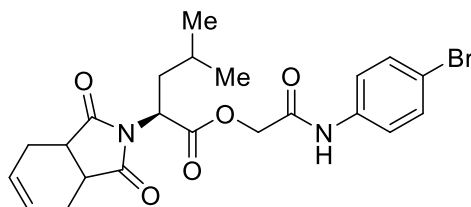

| Acquisition Time (sec) | 3.1654               | Comment           | Thiago 250MHz DMSO-d6 TSS-055 out04tssH5                                | Date                   | 04 Oct 2012 20:19:28 |
|------------------------|----------------------|-------------------|-------------------------------------------------------------------------|------------------------|----------------------|
| Date Stamp             | 04 Oct 2012 20:19:28 | File Name         | C:\USERS\IRFAEL\DESKTOP\SPECTROS TSS\250 - 2012\OUT04TSSH5\1\PDATA\111R |                        |                      |
| Frequency (MHz)        | 250.13               | Nucleus           | 1H                                                                      | Number of Transients   | 16                   |
| Original Points Count  | 16384                | Owner             | root                                                                    | Points Count           | 32768                |
| Receiver Gain          | 456.10               | SW(cyclical) (Hz) | 5175.98                                                                 | Solvent                | DMSO-d6              |
| Spectrum Type          | STANDARD             | Sweep Width (Hz)  | 5175.83                                                                 | Temperature (degree C) | 25.260               |
|                        |                      |                   |                                                                         | Pulse Sequence         | zq30                 |
|                        |                      |                   |                                                                         | Spectrum Offset (Hz)   | 1755.7549            |

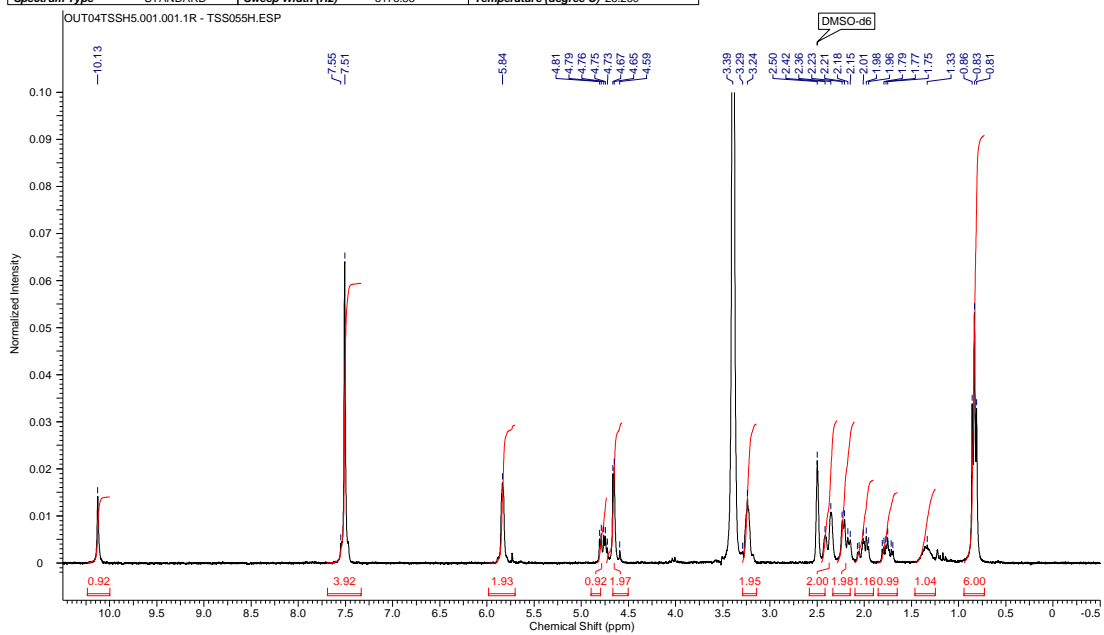

Figure S16  $^1\text{H}$  NMR spectrum of compound **3f** (250 MHz, DMSO).

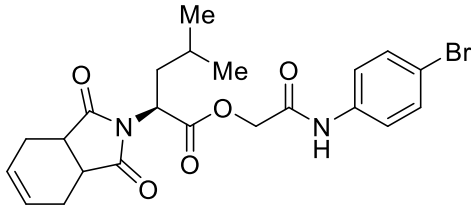

|                        |                      |                   |                                                                          |                        |                      |
|------------------------|----------------------|-------------------|--------------------------------------------------------------------------|------------------------|----------------------|
| Acquisition Time (sec) | 0.5439               | Comment           | Thiago_250MHz_DMSO-d6_TSS-055_out04tss13C                                | Date                   | 05 Oct 2012 07:31:28 |
| Date Stamp             | 05 Oct 2012 07:31:28 | File Name         | C:\USERS\RAFAEL\DESKTOP\ESPECTROS\TSS\250 - 2012\OUT04TSSC5\2\PDATA\111R | Origin                 | spect                |
| Frequency (MHz)        | 62.90                | Nucleus           | 13C                                                                      | Number of Transients   | 10380                |
| Original Points Count  | 8192                 | Owner             | root                                                                     | Points Count           | 32768                |
| Receiver Gain          | 287.40               | SW(cyclical) (Hz) | 15060.24                                                                 | Solvent                | DMSO-d6              |
| Spectrum Type          | STANDARD             | Sweep Width (Hz)  | 15059.78                                                                 | Temperature (degree C) | 25.160               |
|                        |                      |                   |                                                                          | Spectrum Offset (Hz)   | 6265.4478            |

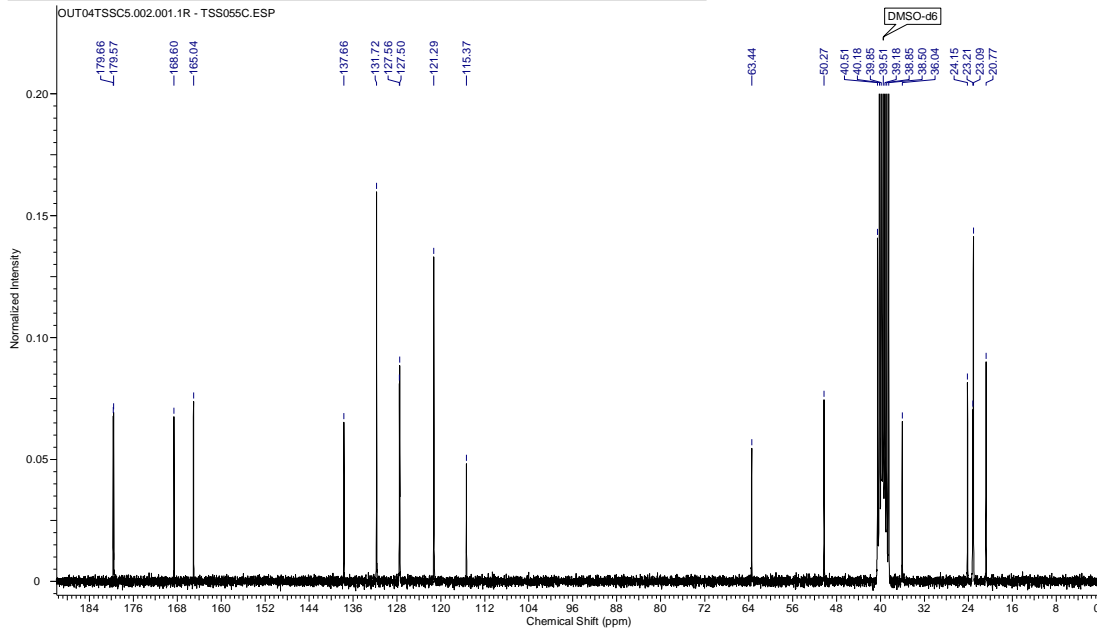

Figure S17 <sup>13</sup>C NMR spectrum of compound 3f (62.5 MHz, DMSO).

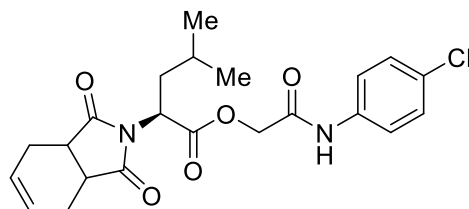

|                        |                      |                   |                                                                        |                        |            |                      |                      |
|------------------------|----------------------|-------------------|------------------------------------------------------------------------|------------------------|------------|----------------------|----------------------|
| Acquisition Time (sec) | 1.5903               | Comment           | Thiago "tss-056"                                                       | dmsd/Av500             | out03tssH1 | Date                 | 03 Oct 2012 14:23:12 |
| Date Stamp             | 03 Oct 2012 14:23:12 | File Name         | C:\USERS\RAFAEL\DESKTOP\SPECTROS TSS500 - 2012\OUT03TSSH1\1\PDATA\111R |                        |            |                      |                      |
| Frequency (MHz)        | 499.87               | Nucleus           | 1H                                                                     | Number of Transients   | 16         | Origin               | spect                |
| Original Points Count  | 16384                | Owner             | nmrsu                                                                  | Points Count           | 65536      | Pulse Sequence       | zg30                 |
| Receiver Gain          | 40.30                | SW(cyclical) (Hz) | 10302.20                                                               | Solvent                | DMSO-d6    | Spectrum Offset (Hz) | 3077.8215            |
| Spectrum Type          | STANDARD             | Sweep Width (Hz)  | 10302.04                                                               | Temperature (degree C) | 25.160     |                      |                      |

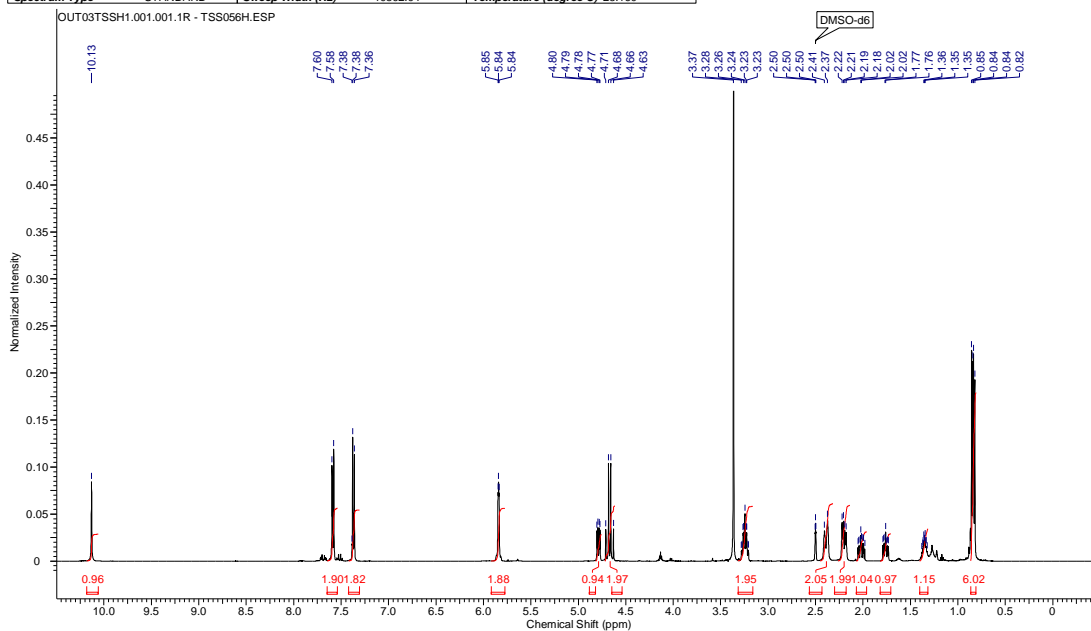

Figure S18  $^1\text{H}$  NMR spectrum of compound **3g** (500 MHz, DMSO).

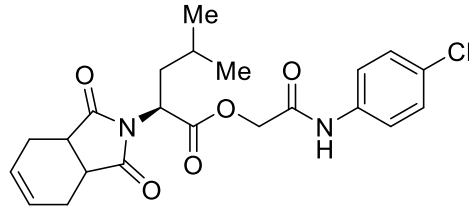

|                        |                      |                   |                                                                         |                        |                      |
|------------------------|----------------------|-------------------|-------------------------------------------------------------------------|------------------------|----------------------|
| Acquisition Time (sec) | 0.4981               | Comment           | Thiago "tss-056" dmsq/Av500 out03tssC1                                  | Date                   | 03 Oct 2012 14:31:44 |
| Date Stamp             | 03 Oct 2012 14:31:44 | File Name         | C:\USERS\RAFAEL\DESKTOP\ESPECTROS TSS500 - 2012\OUT03TSSH1\2\PDATA\1\1R |                        |                      |
| Frequency (MHz)        | 125.69               | Nucleus           | <sup>13</sup> C                                                         | Number of Transients   | 512                  |
| Original Points Count  | 16384                | Owner             | nrmrsu                                                                  | Points Count           | 32768                |
| Receiver Gain          | 2050.00              | SW(cyclical) (Hz) | 32894.74                                                                | Solvent                | DMSO-d6              |
| Spectrum Type          | STANDARD             | Sweep Width (Hz)  | 32893.73                                                                | Temperature (degree C) | 25.152               |
|                        |                      |                   |                                                                         | Spectrum Offset (Hz)   | 13767.5176           |

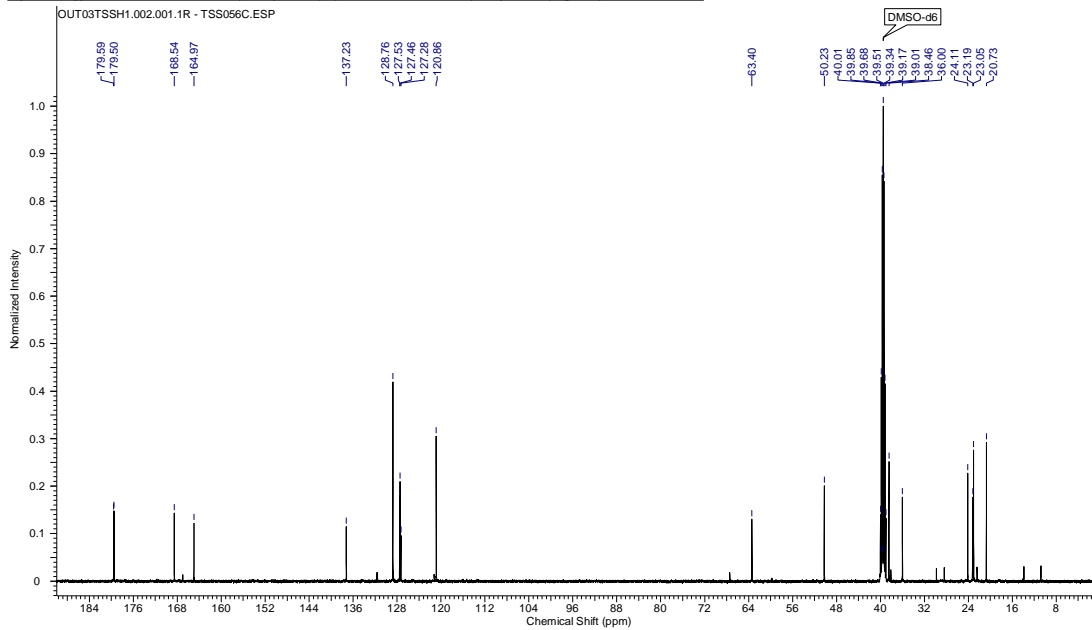

Figure S19 <sup>13</sup>C NMR spectrum of compound **3g** (125 MHz, DMSO).

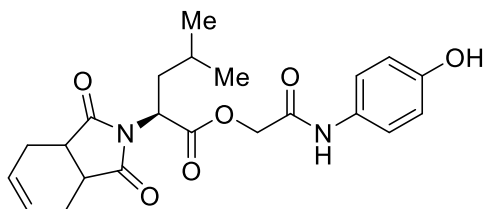

|                        |                                                                                   |                        |                                           |                      |                      |                       |          |
|------------------------|-----------------------------------------------------------------------------------|------------------------|-------------------------------------------|----------------------|----------------------|-----------------------|----------|
| Acquisition Time (sec) | 3.1654                                                                            | Comment                | Thiago TSS-076 DMSO-d6 250 MHz dez06tssH2 | Date                 | 06 Dec 2012 18:16:00 |                       |          |
| Date Stamp             | 06 Dec 2012 18:16:00                                                              |                        |                                           |                      |                      |                       |          |
| File Name              | C:\USERS\RAFAEL\DESKTOP\ESPECTROS TSS\250 - 2012\DEZ06TSSH2 - TSS076\1\PDATA\1\1R |                        |                                           |                      | Frequency (MHz)      | 250.13                |          |
| Nucleus                | 1H                                                                                | Number of Transients   | 32                                        | Origin               | spect                | Original Points Count | 16384    |
| Owner                  | root                                                                              | Points Count           | 32768                                     | Pulse Sequence       | zg30                 | Receiver Gain         | 645.10   |
| SW(cyclical) (Hz)      | 5175.98                                                                           | Solvent                | DMSO-d6                                   | Spectrum Offset (Hz) | 1755.2810            | Spectrum Type         | STANDARD |
| Sweep Width (Hz)       | 5175.83                                                                           | Temperature (degree C) | 25.160                                    |                      |                      |                       |          |

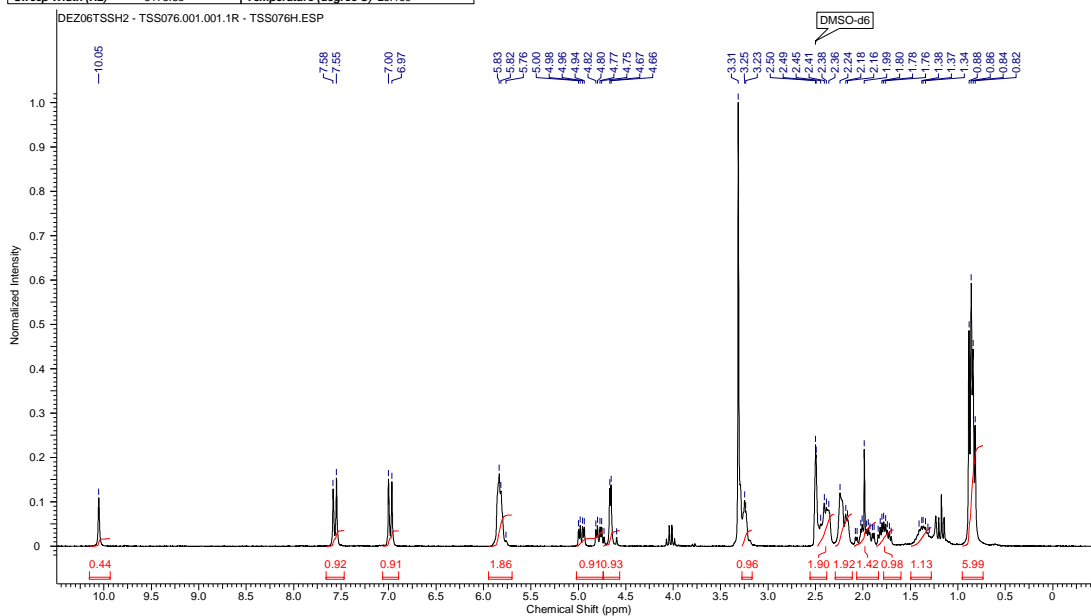

Figure S20  $^1\text{H}$  NMR spectrum of compound **3h** (250 MHz, DMSO).

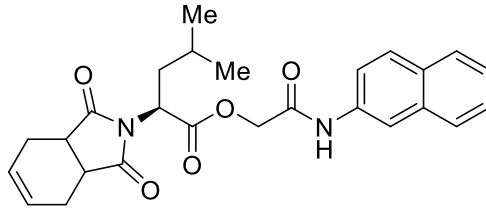

| Acquisition Time (sec) | 3.1654               | Comment           | Thiaqo_TSS-095_CDCI3_250MHz_abr18tssH1                                   | Date                   | 18 Apr 2013 18:02:56 |
|------------------------|----------------------|-------------------|--------------------------------------------------------------------------|------------------------|----------------------|
| Date Stamp             | 18 Apr 2013 18:02:56 | File Name         | C:\USERS\RAFAEL\DESKTOP\ESPECTROS TSS\250 - 2013\ABR18TSSH1\1\PDATA\111R |                        |                      |
| Frequency (MHz)        | 250.13               | Nucleus           | 1H                                                                       | Number of Transients   | 16                   |
| Original Points Count  | 16384                | Owner             | root                                                                     | Points Count           | 32768                |
| Receiver Gain          | 912.30               | SW(cyclical) (Hz) | 5175.98                                                                  | Solvent                | CHLOROFORM-d         |
| Spectrum Offset (Hz)   | 1752.9714            | Spectrum Type     | STANDARD                                                                 | Sweep Width (Hz)       | 5175.83              |
|                        |                      |                   |                                                                          | Temperature (degree C) | 25.160               |

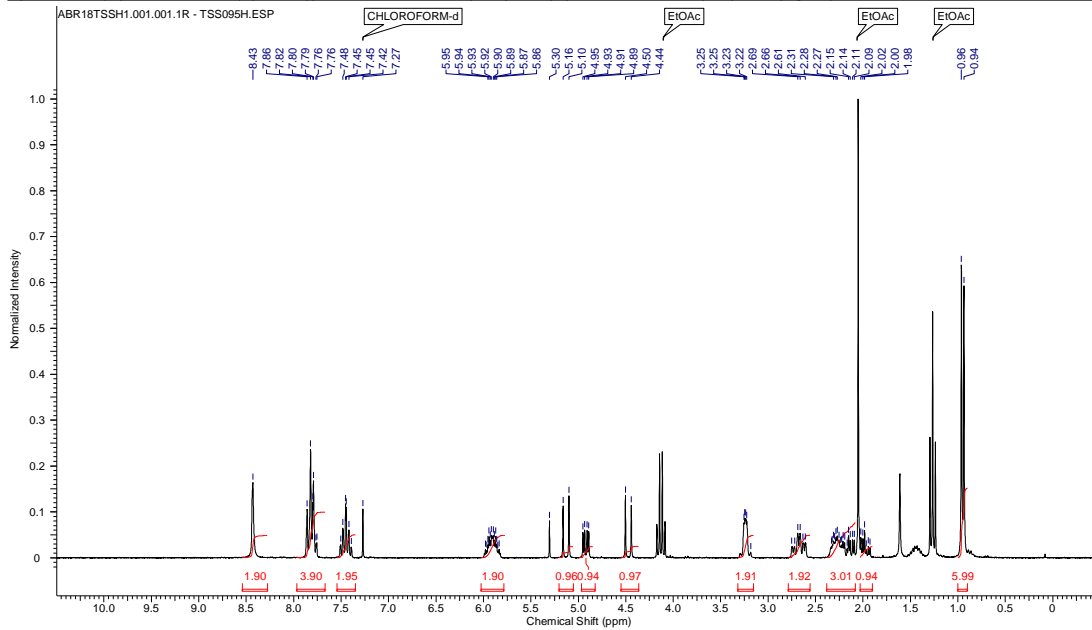

Figure S21 <sup>1</sup>H NMR spectrum of compound **3i** (250 MHz, DMSO).

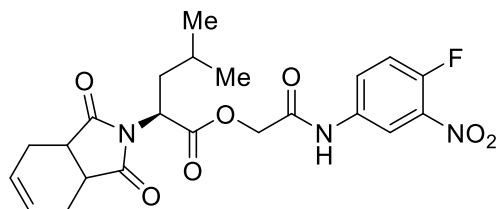

|                        |                                                           |                       |                                            |                        |                      |
|------------------------|-----------------------------------------------------------|-----------------------|--------------------------------------------|------------------------|----------------------|
| Acquisition Time (sec) | 2.0447                                                    | Comment               | Rafael "RAF-45" cdcl3/ Av400MHz fev03rafH1 | Date                   | 04 Feb 2015 06:11:42 |
| File Name              | C:\UNICAMP\Mestrado\RMN400 MHz\Fev 15\fev03rafH1 001001.f | Frequency (MHz)       | 400.18                                     | Nucleus                | <sup>1</sup> H       |
| Number of Transients   | 16                                                        | Original Points Count | 16384                                      | Points Count           | 65536                |
| Solvent                | CHLOROFORM-D                                              | Sweep Width (Hz)      | 8012.82                                    | Temperature (degree C) | 25.160               |
|                        |                                                           |                       |                                            | Pulse Sequence         | zg30                 |

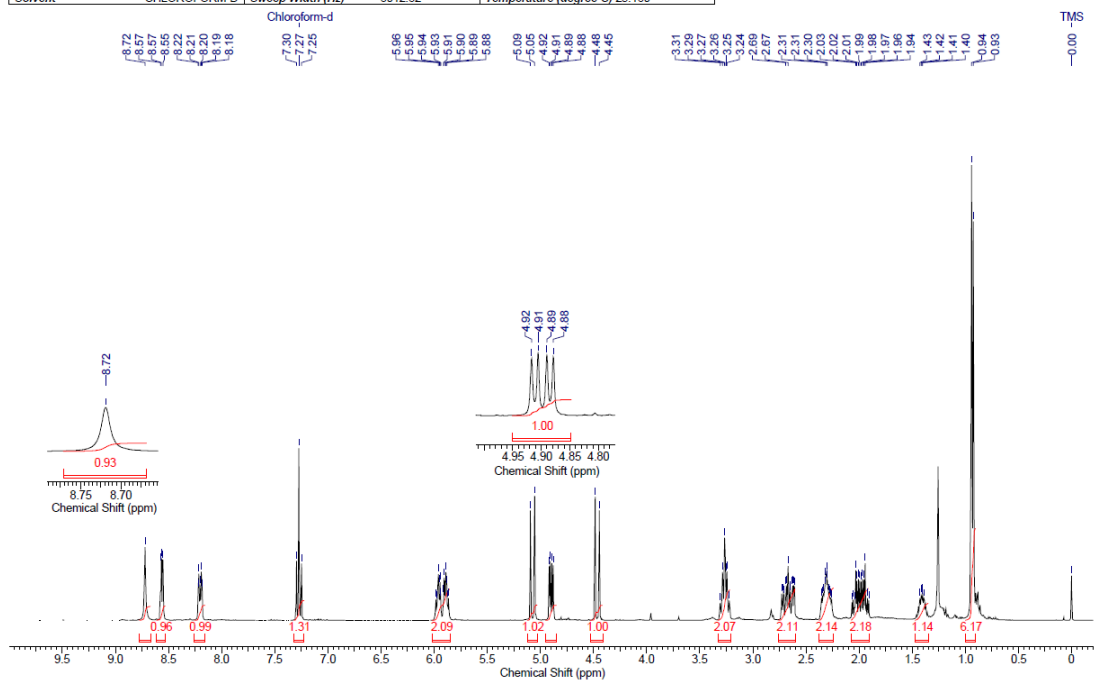

Figure S22 <sup>1</sup>H NMR spectrum of compound **3j** (400 MHz, CDCl<sub>3</sub>).





|                        |                                                           |                        |                                                   |                 |                      |
|------------------------|-----------------------------------------------------------|------------------------|---------------------------------------------------|-----------------|----------------------|
| Acquisition Time (sec) | 0.6816                                                    | Comment                | Rafael "RAF-45" cdcl3/ Av400MHz fev03raffH1 - 13C | Date            | 04 Feb 2015 06:11:48 |
| File Name              | C:\UNICAMP\Mestrado\RMN400 MHz\Fev 15\fev03raffH1_002001r | Original Points Count  | 16384                                             | Frequency (MHz) | 100.63               |
| Number of Transients   | 7168                                                      | Points Count           | 65536                                             | Nucleus         | 13C                  |
| Solvent                | CHLOROFORM-D                                              | Sweep Width (Hz)       | 24038.46                                          | Pulse Sequence  | zpgq30               |
|                        |                                                           | Temperature (degree C) | 25.160                                            |                 |                      |

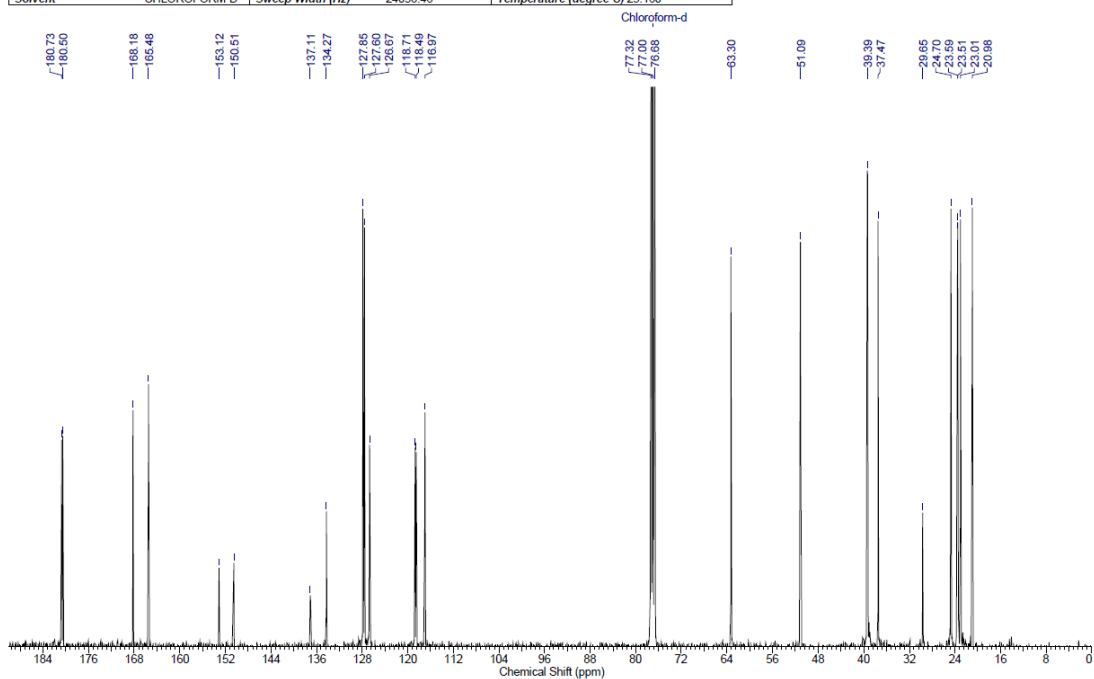

Figure S23 <sup>13</sup>C NMR spectrum of compound **3j** (100 MHz, CDCl<sub>3</sub>).

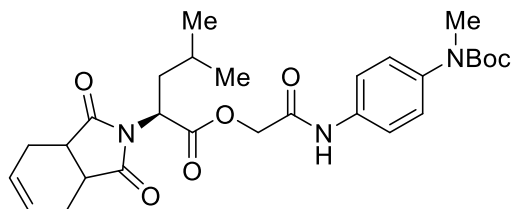

|                        |                                                                           |                      |                                                       |                        |                      |
|------------------------|---------------------------------------------------------------------------|----------------------|-------------------------------------------------------|------------------------|----------------------|
| Acquisition Time (sec) | 1.6384                                                                    | Comment              | Rafael - RAF-25 - CDCl3 - Avance 500 MHz - dez12rafH1 | Date                   | 12 Dec 2014 14:34:40 |
| File Name              | C:\UNICAMP\Mestrado\Rafael Rel 1\RMN500 MHz\2014\Dez\dez12rafH1\001000fid |                      |                                                       | Frequency (MHz)        | 499.87               |
| Nucleus                | 1H                                                                        | Number of Transients | 16                                                    | Original Points Count  | 16384                |
| Pulse Sequence         | zg30                                                                      | Solvent              | CHLOROFORM-D                                          | Sweep Width (Hz)       | 10000.00             |
|                        |                                                                           |                      |                                                       | Points Count           | 16384                |
|                        |                                                                           |                      |                                                       | Temperature (degree C) | 25.147               |

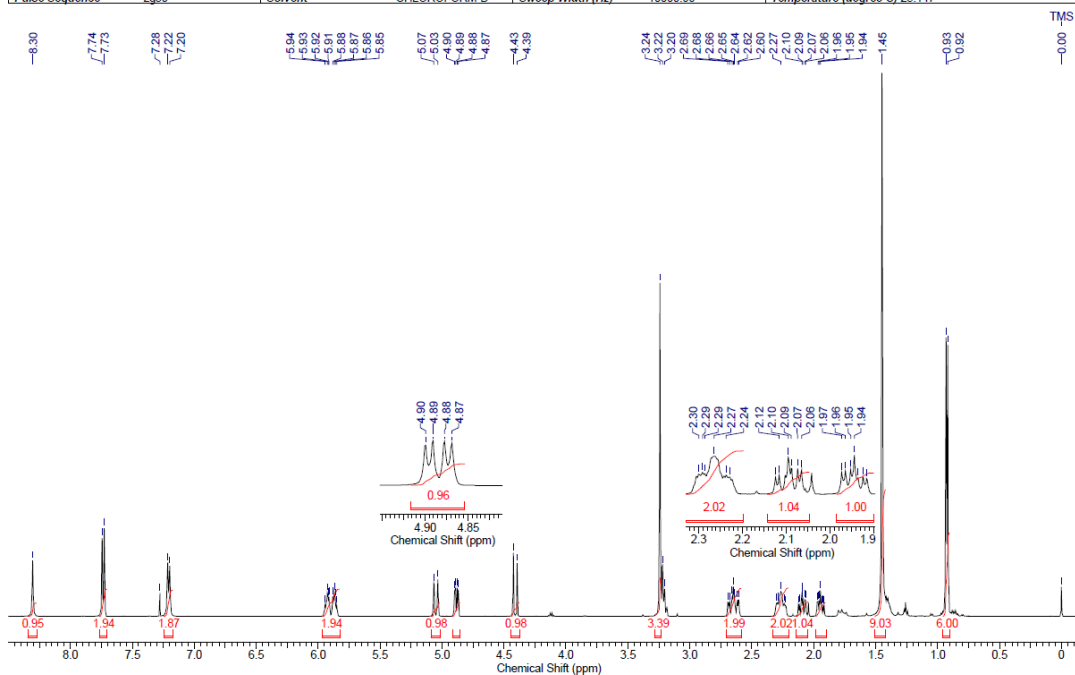

Figure S24 <sup>1</sup>H NMR spectrum of compound **3k** (500 MHz, CDCl<sub>3</sub>).

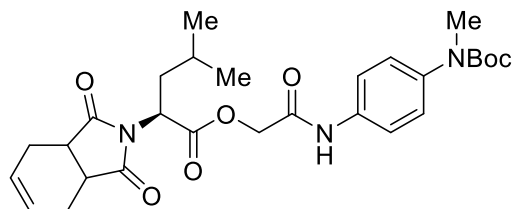

|                        |                                                                                      |                      |                                                       |                        |                      |
|------------------------|--------------------------------------------------------------------------------------|----------------------|-------------------------------------------------------|------------------------|----------------------|
| Acquisition Time (sec) | 0.5505                                                                               | Comment              | Rafael - RAF-25 - CDCl3 - Avance 500 MHz - dez12rafH1 | Date                   | 12 Dec 2014 14:58:08 |
| File Name              | C:\UNICAMP\Mestrado\Rafael Rel 1\RMN500 MHz\2014\Dez\dez12rafH1\dez12rafH1_002000fid |                      |                                                       | Frequency (MHz)        | 125.70               |
| Nucleus                | 13C                                                                                  | Number of Transients | 512                                                   | Original Points Count  | 16384                |
| Pulse Sequence         | zgpg30                                                                               | Solvent              | CHLOROFORM-D                                          | Sweep Width (Hz)       | 29761.90             |
|                        |                                                                                      |                      |                                                       | Points Count           | 16384                |
|                        |                                                                                      |                      |                                                       | Temperature (degree C) | 25.150               |

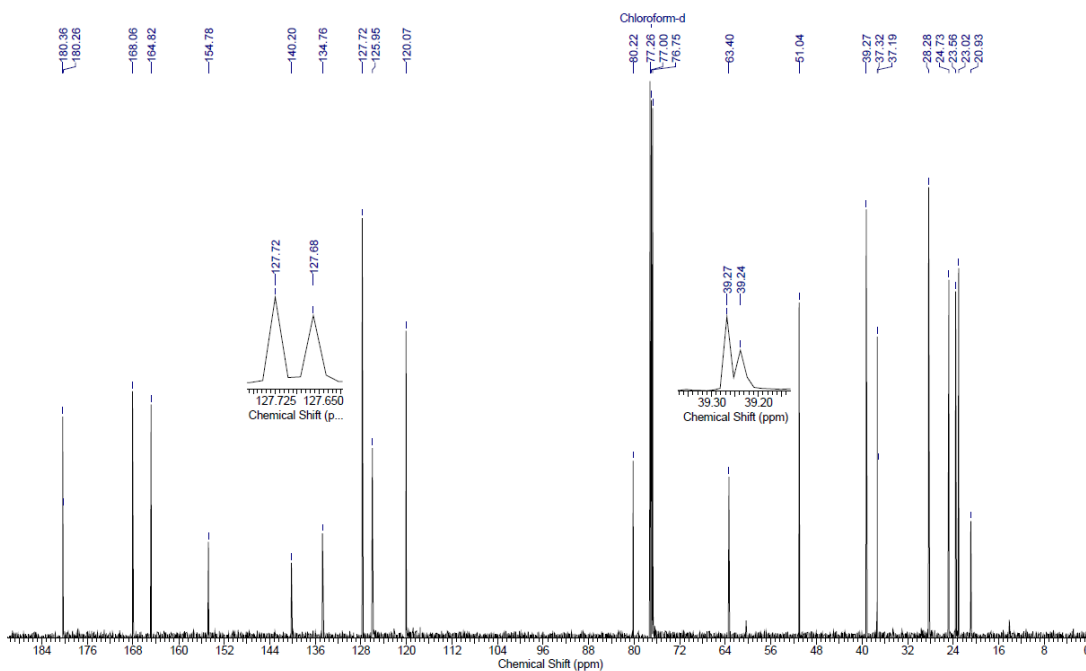

Figure S25  $^{13}\text{C}$  NMR spectrum of compound **3k** (125 MHz,  $\text{CDCl}_3$ ).

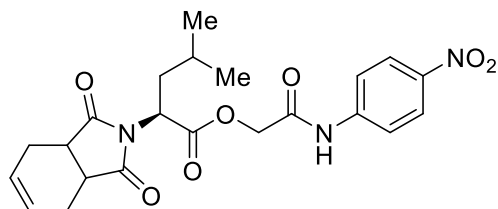

|                        |                                                          |                      |                      |                       |          |
|------------------------|----------------------------------------------------------|----------------------|----------------------|-----------------------|----------|
| Acquisition Time (sec) | 2.6564                                                   | Date                 | 15 Jan 2015 07:43:40 | Frequency (MHz)       | 600.17   |
| File Name              | C:\UNICAMP\Mestrado\RMN600 MHz\Jan 15\jan15rafH2_001001r |                      |                      | Points Count          | 65536    |
| Nucleus                | 1H                                                       | Number of Transients | 16                   | Original Points Count | 32768    |
| Pulse Sequence         | zg30                                                     | Solvent              | CHLOROFORM-D         | Sweep Width (Hz)      | 12335.53 |
| Temperature (degree C) | 25.151                                                   |                      |                      |                       |          |

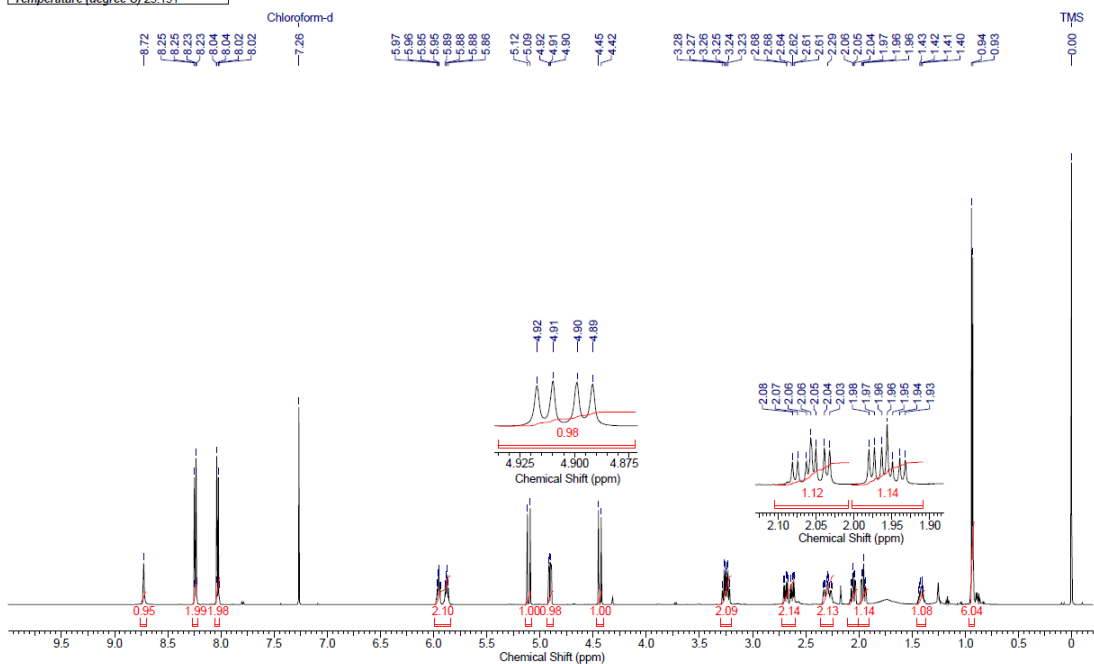

Figure S26  $^1\text{H}$  NMR spectrum of compound 31 (500 MHz,  $\text{CDCl}_3$ ).



|                        |                                                          |                      |                      |                       |          |
|------------------------|----------------------------------------------------------|----------------------|----------------------|-----------------------|----------|
| Acquisition Time (sec) | 0.4544                                                   | Date                 | 15 Jan 2015 08:10:50 | Frequency (MHz)       | 150.91   |
| File Name              | C:\UNICAMP\Mestrado\RMN600 MHz\Jan 15\jan15rafH2_002001r |                      |                      | Points Count          | 32768    |
| Nucleus                | 13C                                                      | Number of Transients | 620                  | Original Points Count | 16384    |
| Pulse Sequence         | zgpg30                                                   | Solvent              | CHLOROFORM-D         | Sweep Width (Hz)      | 36057.69 |
| Temperature (degree C) | 25.147                                                   |                      |                      |                       |          |

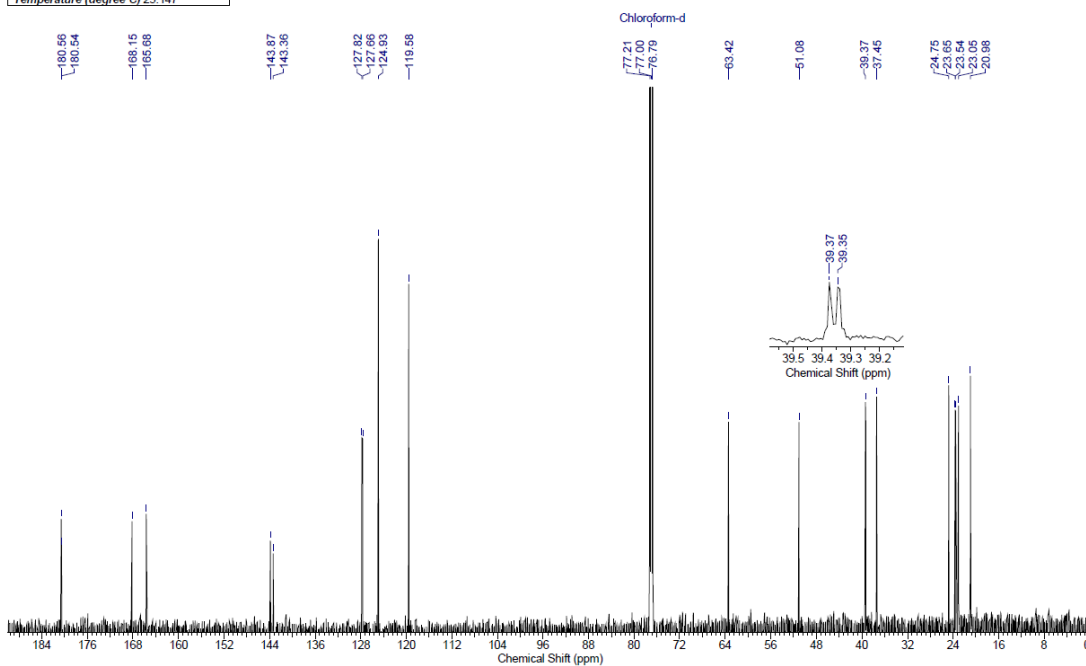

Figure S27 <sup>13</sup>C NMR spectrum of compound **3I** (125 MHz, CDCl<sub>3</sub>).

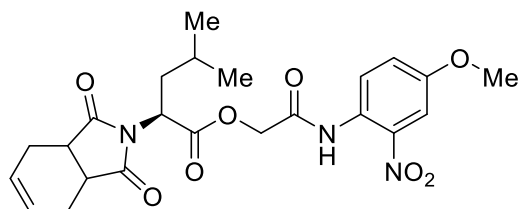

|                        |                                                       |                       |                                                            |                        |                      |
|------------------------|-------------------------------------------------------|-----------------------|------------------------------------------------------------|------------------------|----------------------|
| Acquisition Time (sec) | 1.6384                                                | Comment               | Rafael - RAF-52 - CDCl3 - Avance 500 MHz - fev20rafH1 - 1H | Date                   | 20 Feb 2015 12:09:14 |
| File Name              | C:\UNICAMP\Mestrado\RMN500 MHz\2015\fev20rafH1_001001 | Frequency (MHz)       | 499.87                                                     | Nucleus                | 1H                   |
| Number of Transients   | 1                                                     | Original Points Count | 16384                                                      | Points Count           | 65536                |
| Solvent                | CHLOROFORM-D                                          | Sweep Width (Hz)      | 10000.00                                                   | Temperature (degree C) | 25.133               |
|                        |                                                       |                       |                                                            | Pulse Sequence         | zg30                 |

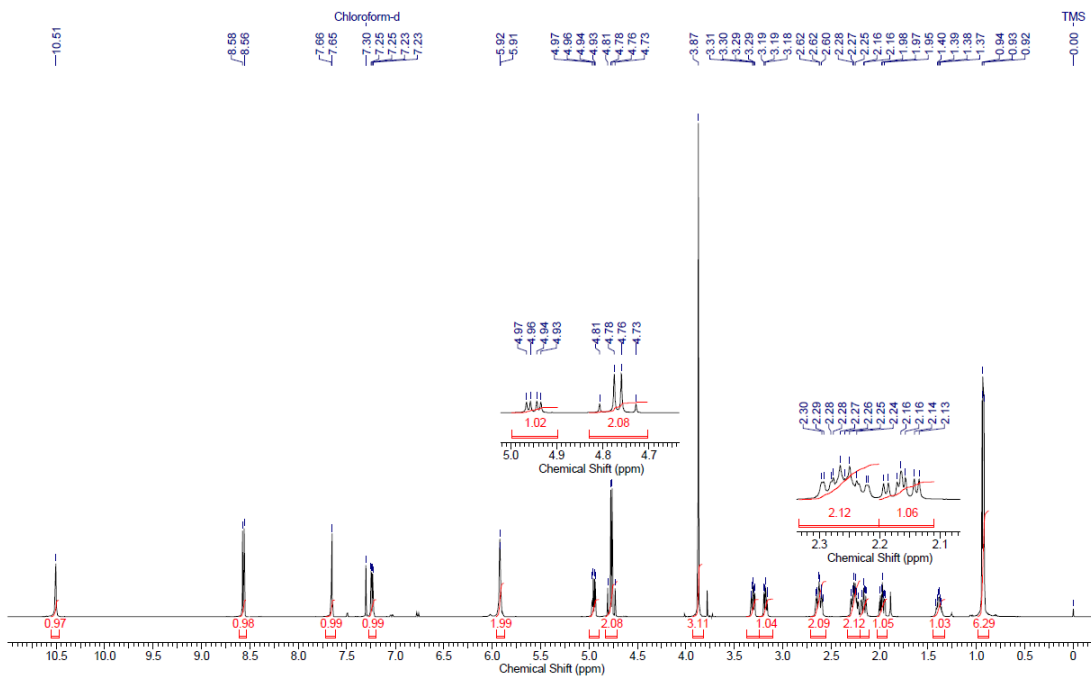

Figure S28 <sup>1</sup>H NMR spectrum of compound 3m (500 MHz, CDCl<sub>3</sub>).

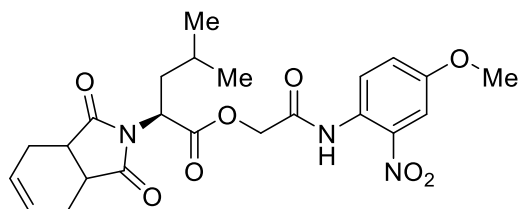

|                        |                                                            |                       |                                                             |                        |                      |
|------------------------|------------------------------------------------------------|-----------------------|-------------------------------------------------------------|------------------------|----------------------|
| Acquisition Time (sec) | 0.5505                                                     | Comment               | Rafael - RAF-52 - CDCl3 - Avance 500 MHz - fev20rafH1 - 13C | Date                   | 20 Feb 2015 12:10:04 |
| File Name              | C:\UNICAMP\Mestrado\RMN500 MHz\2015\Fev\fev20rafH1_002001r | Frequency (MHz)       | 125.69                                                      | Nucleus                | 13C                  |
| Number of Transients   | 300                                                        | Original Points Count | 16384                                                       | Points Count           | 32768                |
| Solvent                | CHLOROFORM-D                                               | Sweep Width (Hz)      | 29761.90                                                    | Temperature (degree C) | 25.150               |
|                        |                                                            |                       |                                                             | Pulse Sequence         | zpgq30               |

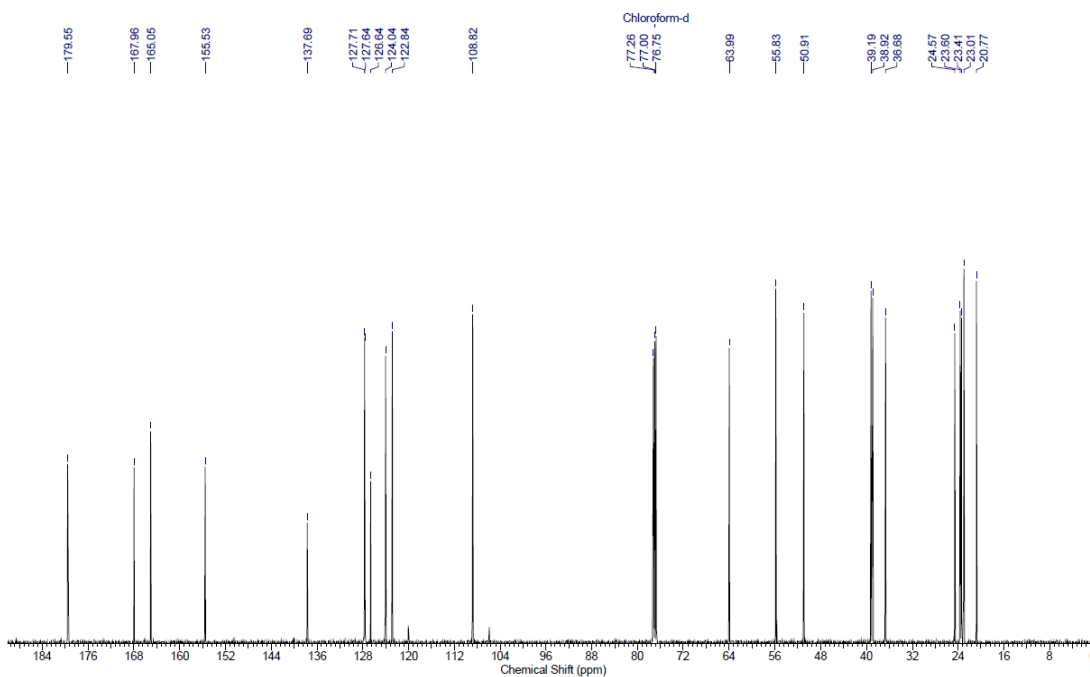

Figure S29  $^{13}\text{C}$  NMR spectrum of compound **3m** (125 MHz,  $\text{CDCl}_3$ ).



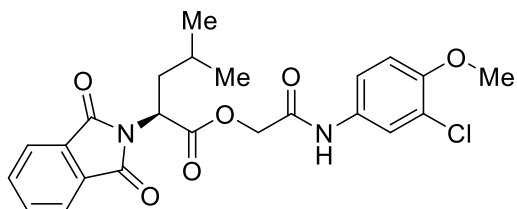

| Acquisition Time (sec) | 3.1654               | Comment           | Thiago- TSS 023 - DMSO - Bruker 250 MHz - set25tssH2                     | Date                   | 25 Sep 2012 14:38:08 |
|------------------------|----------------------|-------------------|--------------------------------------------------------------------------|------------------------|----------------------|
| Date Stamp             | 25 Sep 2012 14:38:08 | File Name         | C:\USERS\RAFAEL\DESKTOP\ESPECTROS TSS\250 - 2012\SET25TSSH2\1\PDATA\111R |                        |                      |
| Frequency (MHz)        | 250.13               | Nucleus           | <sup>1</sup> H                                                           | Number of Transients   | 16                   |
| Original Points Count  | 16384                | Owner             | root                                                                     | Points Count           | 32768                |
| Receiver Gain          | 456.10               | SW(cyclical) (Hz) | 5175.98                                                                  | Solvent                | DMSO-d6              |
| Spectrum Type          | STANDARD             | Sweep Width (Hz)  | 5175.83                                                                  | Temperature (degree C) | 25.160               |
|                        |                      |                   |                                                                          | Spectrum Offset (Hz)   | 1756.3867            |

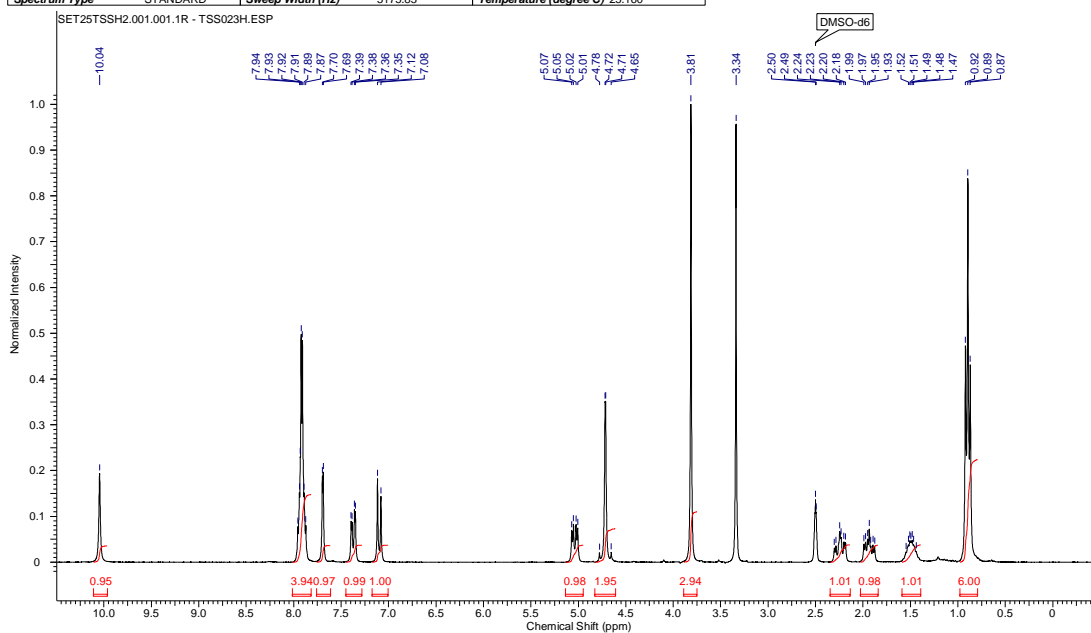

Figure S30 <sup>1</sup>H NMR spectrum of compound 10a (250 MHz, DMSO).

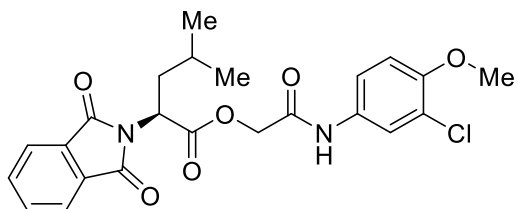

|                        |                      |                   |                                                                          |                        |                      |
|------------------------|----------------------|-------------------|--------------------------------------------------------------------------|------------------------|----------------------|
| Acquisition Time (sec) | 0.5439               | Comment           | Thiago - TSS 023 - DMSO - Bruker 250 MHz - set25tssC2                    | Date                   | 25 Sep 2012 15:29:20 |
| Date Stamp             | 25 Sep 2012 15:29:20 | File Name         | C:\USERS\RAFAEL\DESKTOP\ESPECTROS\TSS\250 - 2012\SET25TSSC2\1\PDATA\111R |                        |                      |
| Frequency (MHz)        | 62.90                | Nucleus           | 13C                                                                      | Number of Transients   | 1126                 |
| Original Points Count  | 8192                 | Owner             | root                                                                     | Points Count           | 32768                |
| Receiver Gain          | 512.00               | SW(cyclical) (Hz) | 15060.24                                                                 | Solvent                | DMSO-d6              |
| Spectrum Type          | STANDARD             | Sweep Width (Hz)  | 15059.78                                                                 | Temperature (degree C) | 25.160               |
|                        |                      |                   |                                                                          | Spectrum Offset (Hz)   | 6260.8516            |

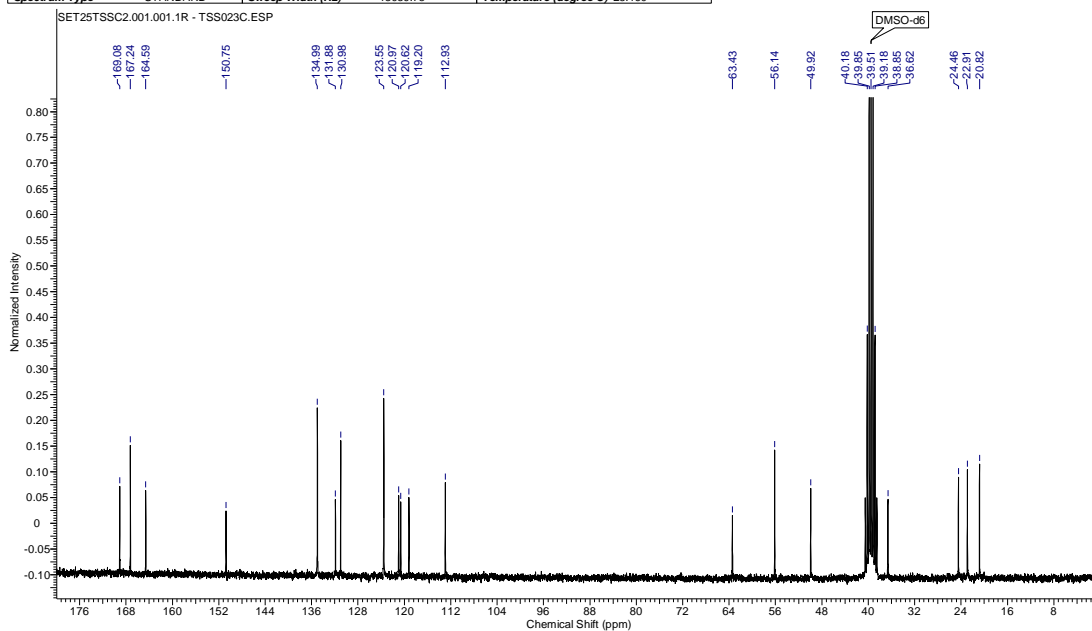

Figure S31  $^{13}\text{C}$  NMR spectrum of compound **10a** (62.5 MHz, DMSO).

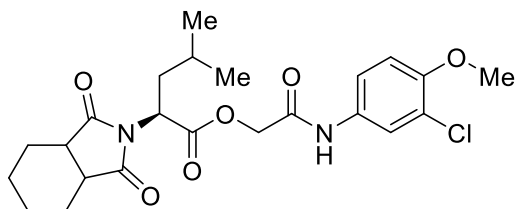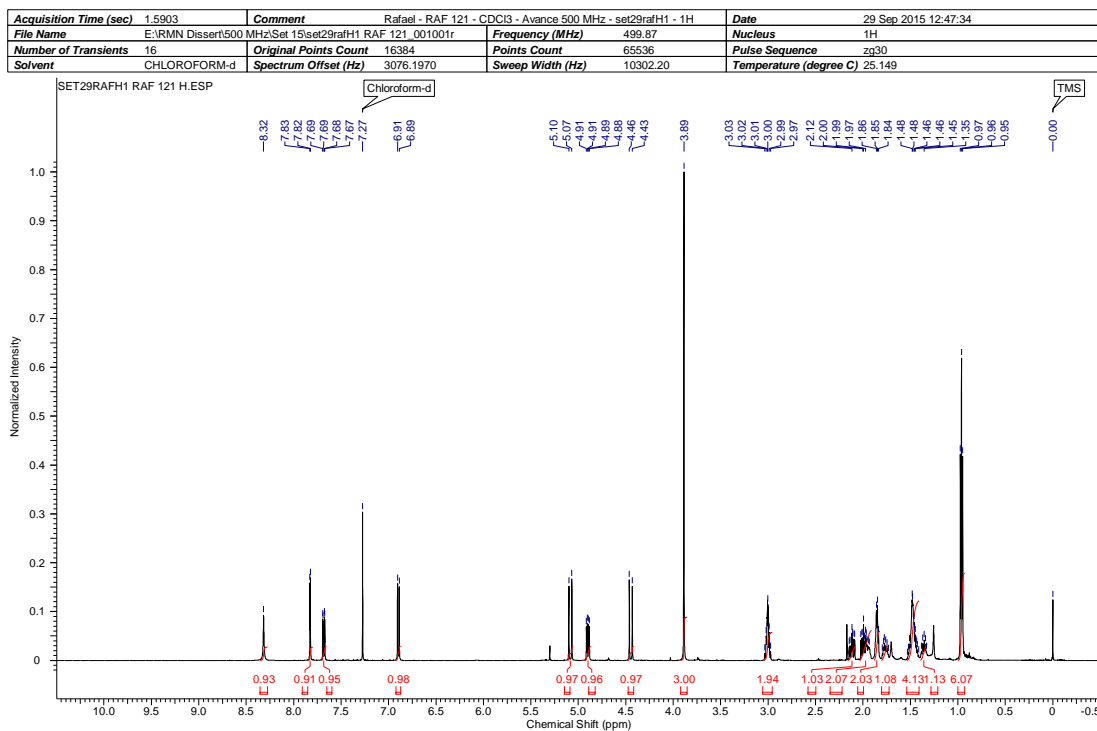

Figure S32  $^1\text{H}$  NMR spectrum of compound **10b** (500 MHz,  $\text{CDCl}_3$ ).



|                        |                                                          |                       |                                                                          |                        |                      |
|------------------------|----------------------------------------------------------|-----------------------|--------------------------------------------------------------------------|------------------------|----------------------|
| Acquisition Time (sec) | 0.4981                                                   | Comment               | Rafael - RAF 121 - CDCl <sub>3</sub> - Avance 500 MHz - set29rafh1 - 13C | Date                   | 29 Sep 2015 12:49:54 |
| File Name              | E:\RMN Dissert\500 MHz\Set 15\set29rafh1 RAF 121_002001r | Frequency (MHz)       | 125.69                                                                   | Nucleus                | 13C                  |
| Number of Transients   | 171                                                      | Original Points Count | 16384                                                                    | Points Count           | 32768                |
| Solvent                | CHLOROFORM-d                                             | Spectrum Offset (Hz)  | 13817.8916                                                               | Sweep Width (Hz)       | 32894.74             |
|                        |                                                          |                       |                                                                          | Pulse Sequence         | zgpg30               |
|                        |                                                          |                       |                                                                          | Temperature (degree C) | 25.148               |

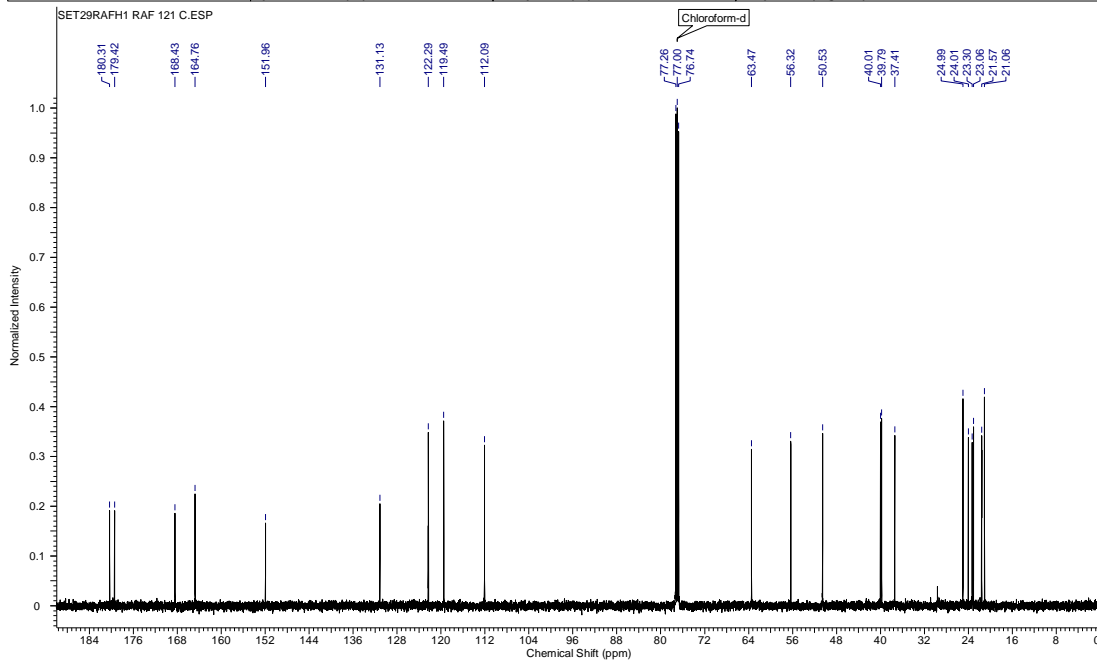

Figure S33 <sup>13</sup>C NMR spectrum of compound 10b (125 MHz, CDCl<sub>3</sub>).

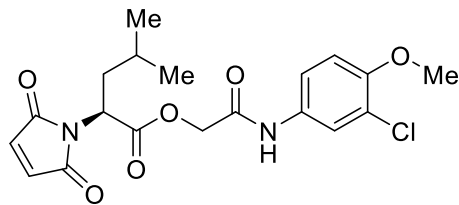

|                        |                                                                  |                      |                                             |                       |                      |
|------------------------|------------------------------------------------------------------|----------------------|---------------------------------------------|-----------------------|----------------------|
| Acquisition Time (sec) | 2.0447                                                           | Comment              | Rafael "RAF-114" cdc131 Av400MHz nov09rafH1 | Date                  | 09 Nov 2015 14:09:52 |
| File Name              | E:\RMN Dissert\400 MHz\Nov 15\nov09rafH1 RAF 114 RAF 142_0010011 |                      |                                             | Frequency (MHz)       | 400.18               |
| Nucleus                | <sup>1</sup> H                                                   | Number of Transients | 16                                          | Original Points Count | 16384                |
| Pulse Sequence         | zg30                                                             | Solvent              | CHLOROFORM-d                                | Spectrum Offset (Hz)  | 2464.1240            |
| Temperature (degree C) | 25.160                                                           |                      |                                             | Points Count          | 65536                |
|                        |                                                                  |                      |                                             | Sweep Width (Hz)      | 8012.82              |

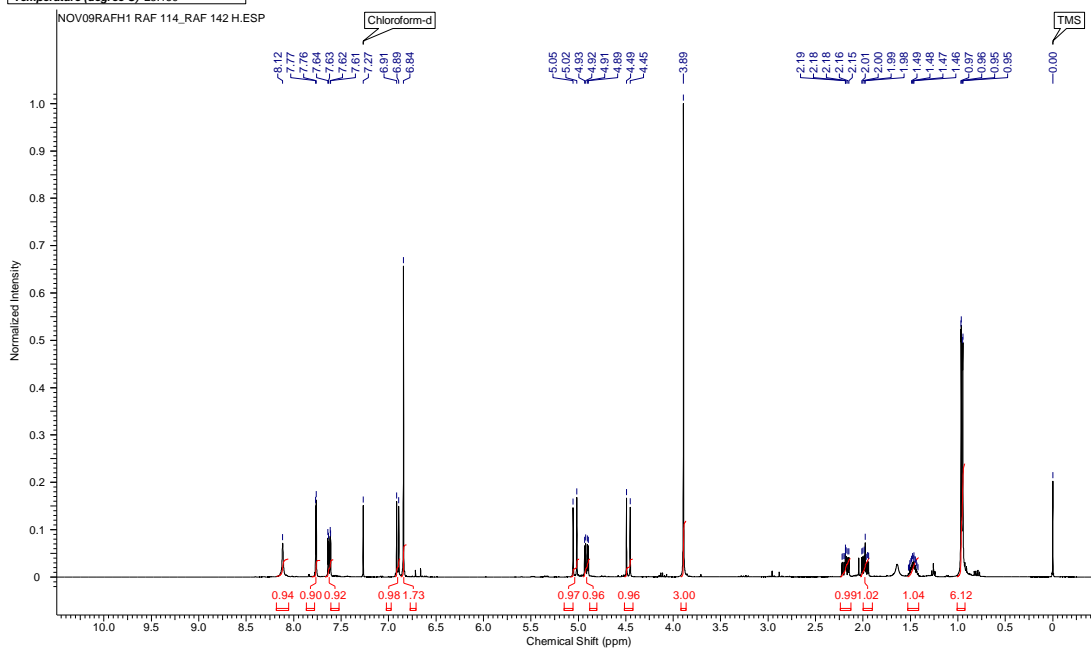

Figure S34 <sup>1</sup>H NMR spectrum of compound 10c (400 MHz, CDCl<sub>3</sub>).

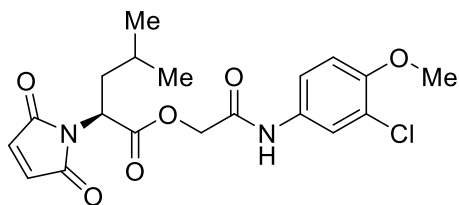

|                        |                                                                  |                      |                                                   |                       |                      |
|------------------------|------------------------------------------------------------------|----------------------|---------------------------------------------------|-----------------------|----------------------|
| Acquisition Time (sec) | 0.6816                                                           | Comment              | Rafael "RAF-114" cdcl3/ Av400MHz nov09rafH1 - 13C | Date                  | 09 Nov 2015 15:14:16 |
| File Name              | E:\RMN Dissert\400 MHz\Nov 15\nov09rafH1 RAF 114 RAF 142_002001r |                      |                                                   | Frequency (MHz)       | 100.63               |
| Nucleus                | 13C                                                              | Number of Transients | 1600                                              | Original Points Count | 16384                |
| Pulse Sequence         | zgpg30                                                           | Solvent              | CHLOROFORM-d                                      | Spectrum Offset (Hz)  | 10058.0957           |
| Temperature (degree C) | 25.160                                                           |                      |                                                   | Sweep Width (Hz)      | 24038.46             |

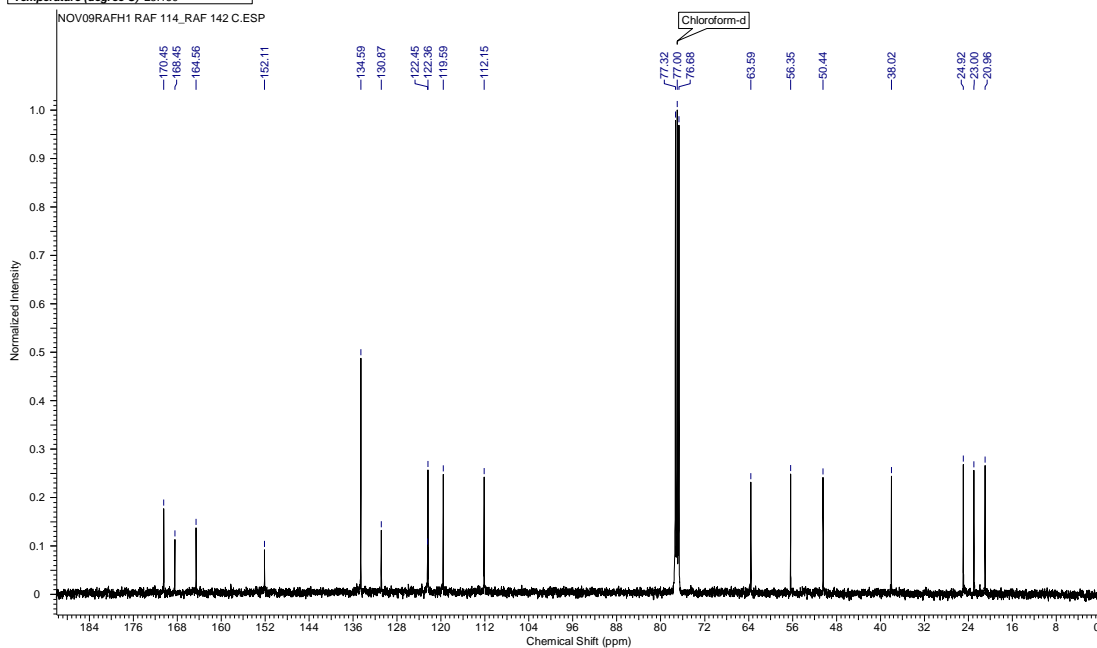

Figure S35  $^{13}\text{C}$  NMR spectrum of compound **10c** (100 MHz,  $\text{CDCl}_3$ ).

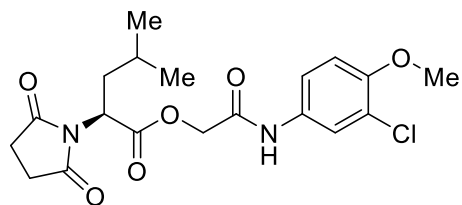

|                        |                                                          |                       |                                                             |                        |                      |
|------------------------|----------------------------------------------------------|-----------------------|-------------------------------------------------------------|------------------------|----------------------|
| Acquisition Time (sec) | 2.0447                                                   | Comment               | Rafael - RAF 125 - CDCl3 - Avance 400 MHz - out08rafH1 - 1H | Date                   | 08 Oct 2015 08:34:20 |
| File Name              | E:\RMN Dissert\400 MHz\Out 15\out08rafH1 RAF 125_001001r | Original Points Count | 16384                                                       | Frequency (MHz)        | 400.18               |
| Number of Transients   | 16                                                       | Points Count          | 65536                                                       | Pulse Sequence         | zg30                 |
| Solvent                | CHLOROFORM-D                                             | Sweep Width (Hz)      | 8012.82                                                     | Temperature (degree C) | 25.260               |

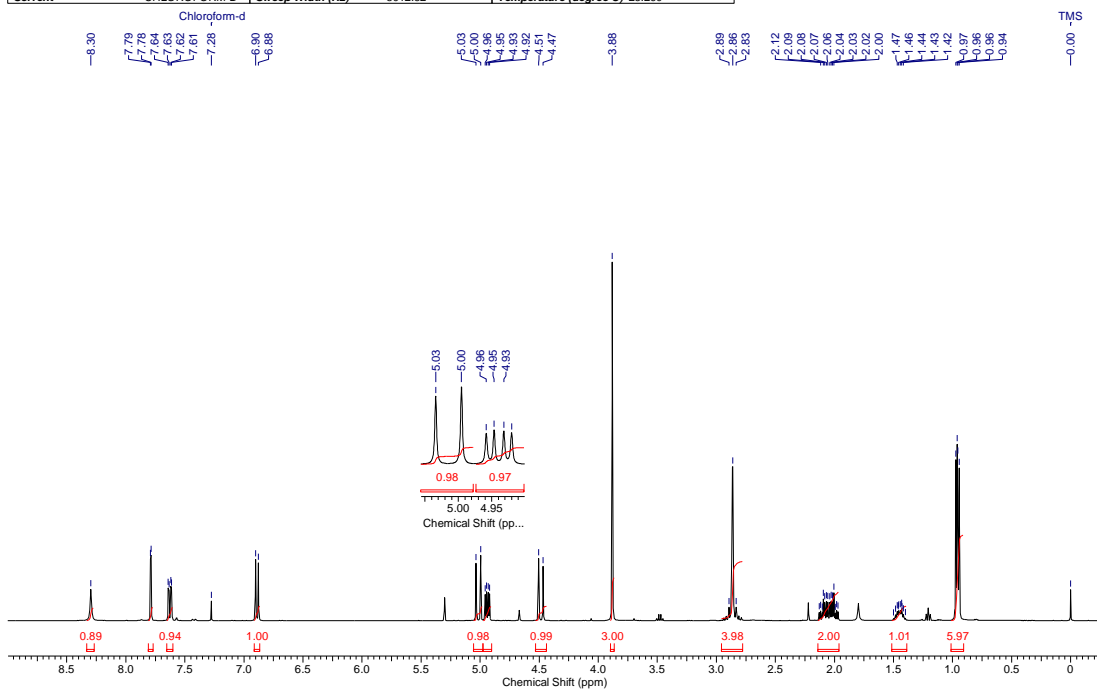

Figure S36  $^1\text{H}$  NMR spectrum of compound 10d (400 MHz,  $\text{CDCl}_3$ ).



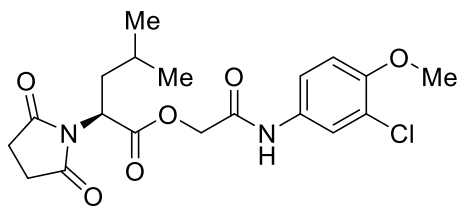

|                        |                                                          |                       |                                                              |                        |                      |
|------------------------|----------------------------------------------------------|-----------------------|--------------------------------------------------------------|------------------------|----------------------|
| Acquisition Time (sec) | 0.6816                                                   | Comment               | Rafael - RAF 125 - CDCl3 - Avance 400 MHz - out08rafH1 - 13C | Date                   | 08 Oct 2015 08:35:16 |
| File Name              | E:\RMN Dissert\400 MHz\Out 15\out08rafH1 RAF 125_002001r | Frequency (MHz)       | 100.63                                                       | Nucleus                | 13C                  |
| Number of Transients   | 647                                                      | Original Points Count | 16384                                                        | Points Count           | 65536                |
| Solvent                | CHLOROFORM-D                                             | Sweep Width (Hz)      | 24038.46                                                     | Temperature (degree C) | 25.160               |

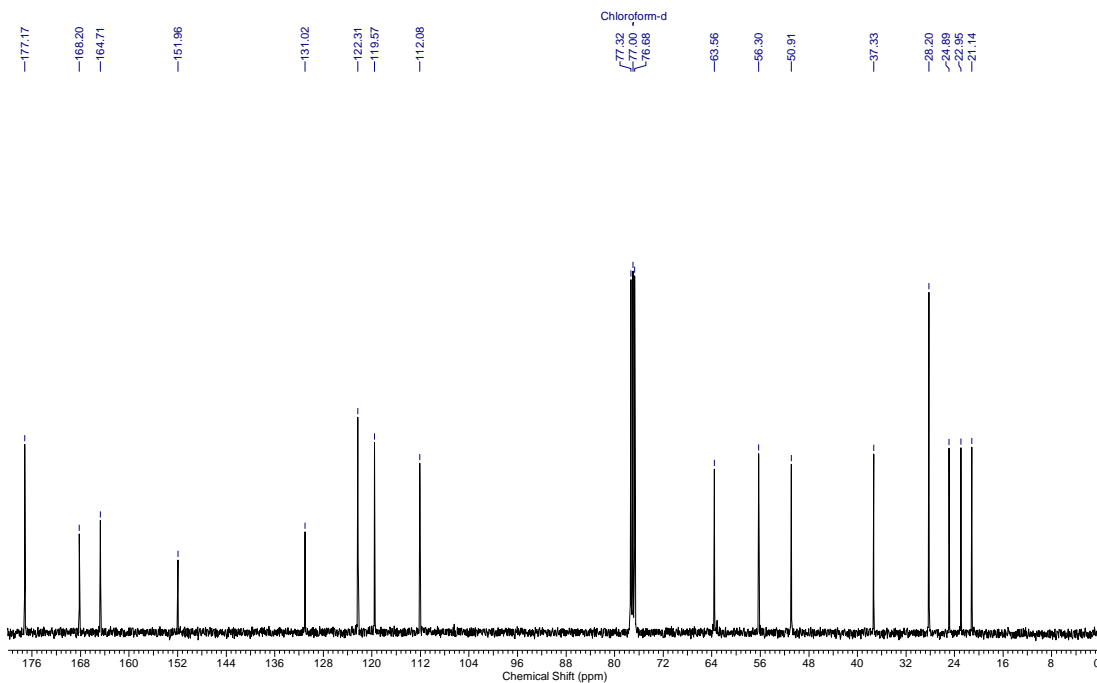

Figure S37  $^{13}\text{C}$  NMR spectrum of compound **10d** (100 MHz,  $\text{CDCl}_3$ ).

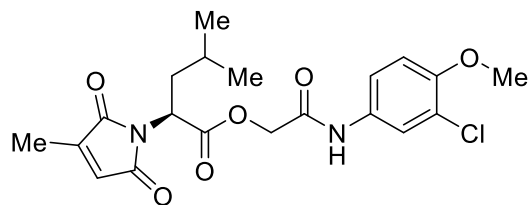

|                        |                                                          |                        |                                                                        |                 |                      |
|------------------------|----------------------------------------------------------|------------------------|------------------------------------------------------------------------|-----------------|----------------------|
| Acquisition Time (sec) | 1.5903                                                   | Comment                | Rafael - RAF175 - CDCl3 - Avance 500 MHz - mar24rafH1 - <sup>1</sup> H | Date            | 24 Mar 2016 14:31:32 |
| File Name              | E:\RMN Dissert\500 MHz\Mar 16\mar24rafH1 RAF 175_001001r | Original Points Count  | 16384                                                                  | Frequency (MHz) | 499.87               |
| Number of Transients   | 16                                                       | Sweep Width (Hz)       | 10302.20                                                               | Points Count    | 65536                |
| Solvent                | CHLOROFORM-D                                             | Temperature (degree C) | 23.263                                                                 | Pulse Sequence  | zg30                 |

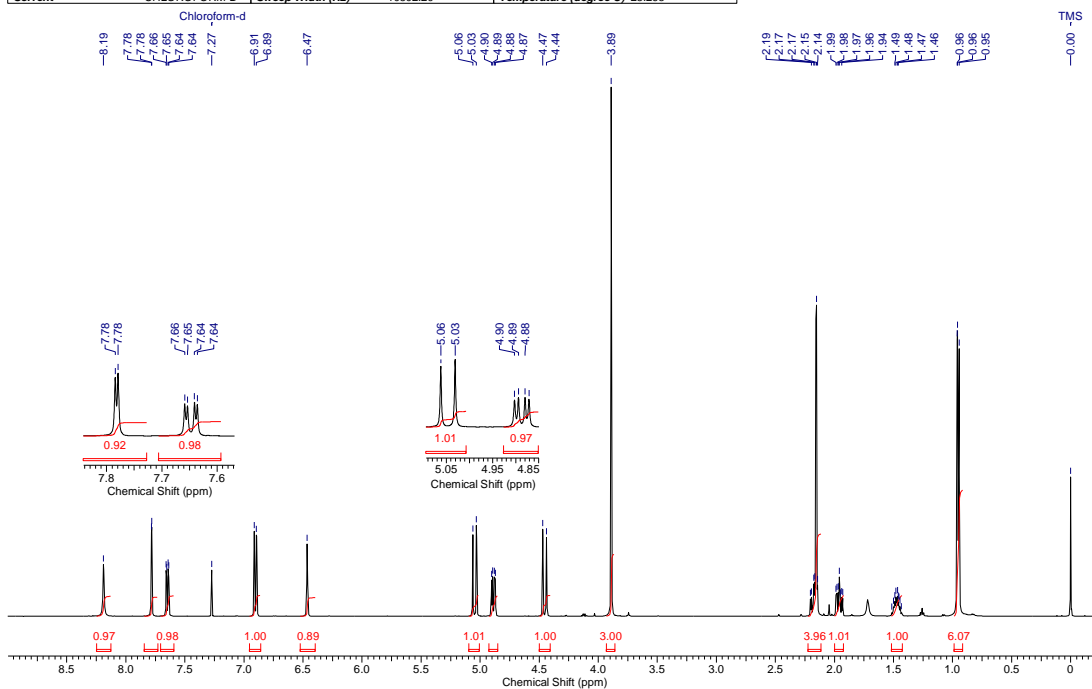

Figure S38 <sup>1</sup>H NMR spectrum of compound 10e (500 MHz, CDCl<sub>3</sub>).

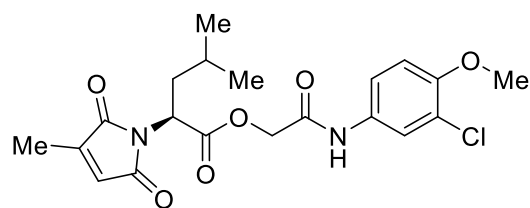

|                        |                                                          |                       |                                                                         |                        |                      |
|------------------------|----------------------------------------------------------|-----------------------|-------------------------------------------------------------------------|------------------------|----------------------|
| Acquisition Time (sec) | 0.4981                                                   | Comment               | Rafael - RAF175 - CDCl3 - Avance 500 MHz - mar24rafH1 - <sup>13</sup> C | Date                   | 24 Mar 2016 14:43:10 |
| File Name              | E:\RMN Dissert\500 MHz\Mar 16\mar24rafH1 RAF 175_002001r | Frequency (MHz)       | 125.69                                                                  | Nucleus                | <sup>13</sup> C      |
| Number of Transients   | 255                                                      | Original Points Count | 16384                                                                   | Points Count           | 32768                |
| Solvent                | CHLOROFORM-D                                             | Sweep Width (Hz)      | 32894.74                                                                | Temperature (degree C) | 24.045               |

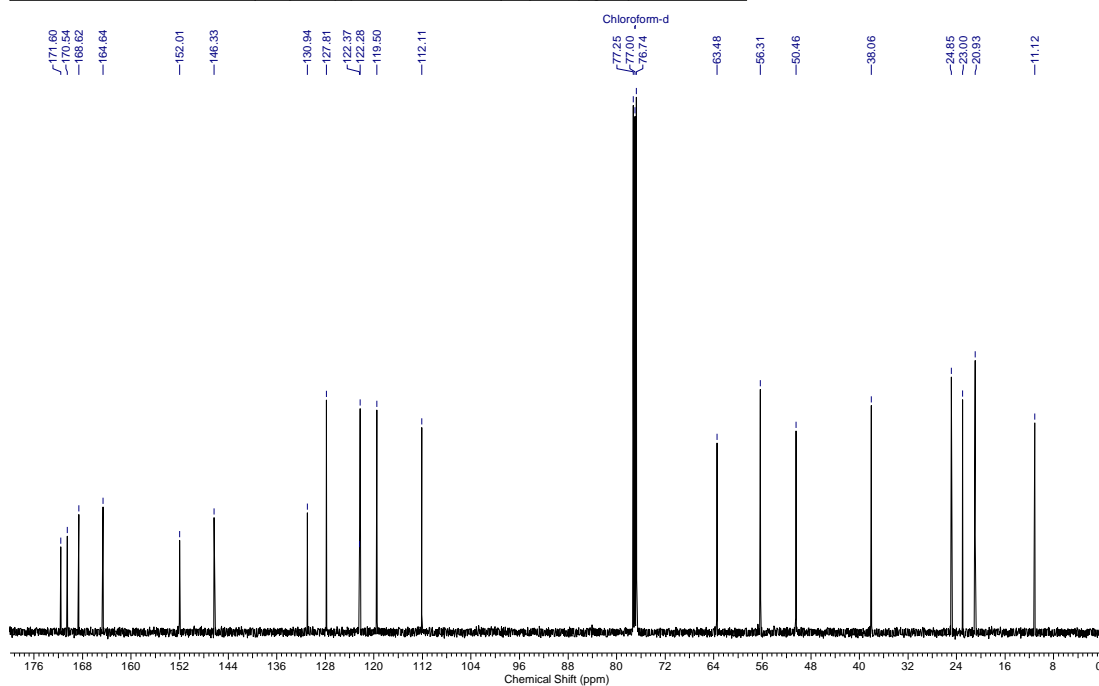

Figure S39 <sup>13</sup>C NMR spectrum of compound 10e (125 MHz, CDCl<sub>3</sub>).



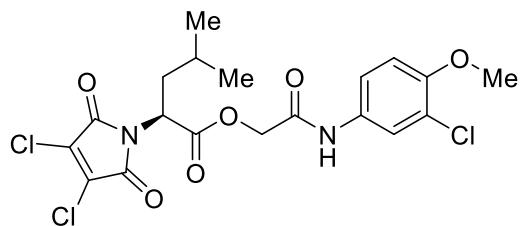

|                        |                                                          |                       |                                                              |                        |                      |
|------------------------|----------------------------------------------------------|-----------------------|--------------------------------------------------------------|------------------------|----------------------|
| Acquisition Time (sec) | 0.4981                                                   | Comment               | Rafael - RAF 187 - CDCl3 - Avance 500 MHz - abr18rafH2 - 13C | Date                   | 18 Apr 2016 14:18:14 |
| File Name              | E:\RMN Dissert\500 MHz\Abr 16\abr18rafH2 RAF 187_001001r | Frequency (MHz)       | 125.69                                                       | Nucleus                | 13C                  |
| Number of Transients   | 1024                                                     | Original Points Count | 16384                                                        | Points Count           | 32768                |
| Solvent                | CHLOROFORM-D                                             | Sweep Width (Hz)      | 32894.74                                                     | Temperature (degree C) | 27.151               |

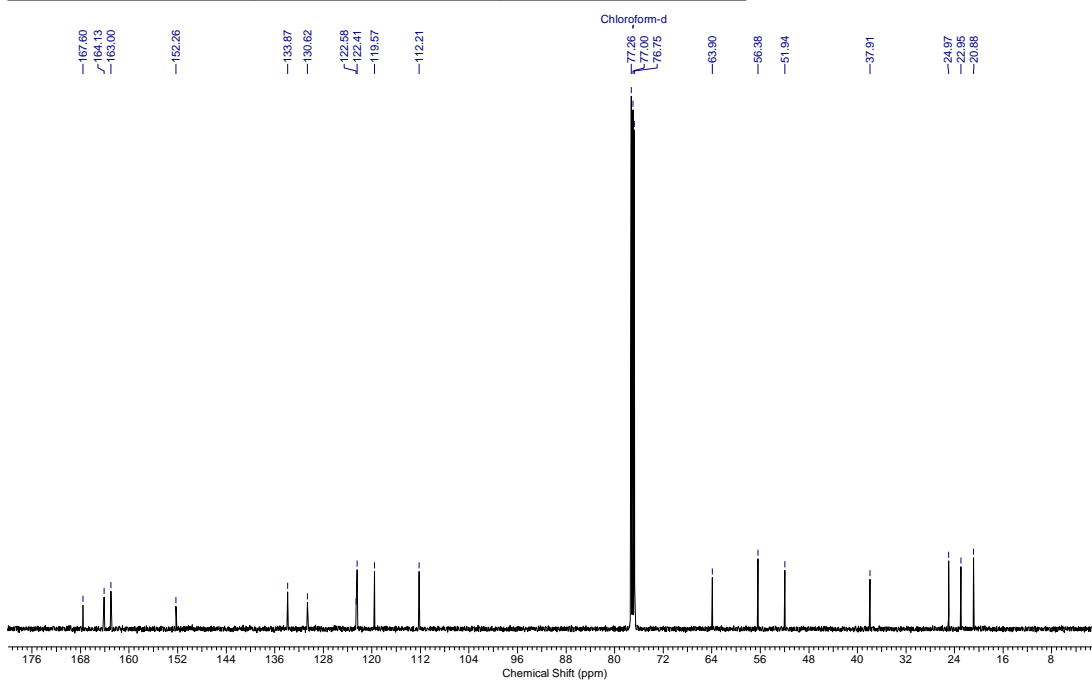

Figure S41  $^{13}\text{C}$  NMR spectrum of compound **10f** (125 MHz,  $\text{CDCl}_3$ ).

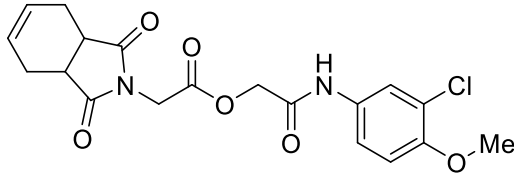

|                        |                                                                                 |                        |                                           |                      |                      |                       |          |
|------------------------|---------------------------------------------------------------------------------|------------------------|-------------------------------------------|----------------------|----------------------|-----------------------|----------|
| Acquisition Time (sec) | 3.1654                                                                          | Comment                | Thiago TSS-075 DMSO-d6 250 MHz dez06tssH1 | Date                 | 06 Dec 2012 18:11:44 |                       |          |
| Date Stamp             | 06 Dec 2012 18:11:44                                                            |                        |                                           |                      |                      |                       |          |
| File Name              | C:\USERS\RAFAEL\DESKTOP\SPECTROS TSS\250 - 2012\DEZ06TSSH1 - TSS075\1\PDAT\1\1R |                        |                                           |                      | Frequency (MHz)      | 250.13                |          |
| Nucleus                | 1H                                                                              | Number of Transients   | 32                                        | Origin               | spect                | Original Points Count | 16384    |
| Owner                  | root                                                                            | Points Count           | 32768                                     | Pulse Sequence       | zg30                 | Receiver Gain         | 724.10   |
| SW(cyclical) (Hz)      | 5175.98                                                                         | Solvent                | DMSO-d6                                   | Spectrum Offset (Hz) | 1755.7549            | Spectrum Type         | STANDARD |
| Sweep Width (Hz)       | 5175.83                                                                         | Temperature (degree C) | 25.160                                    |                      |                      |                       |          |

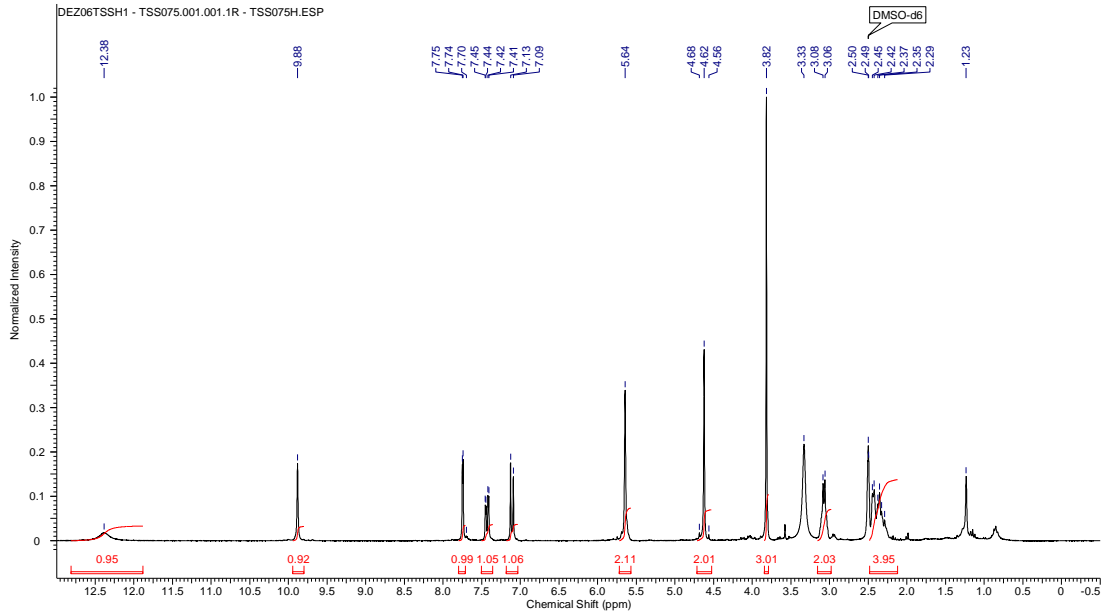

Figure S42 <sup>1</sup>H NMR spectrum of compound **10g** (250 MHz, DMSO).

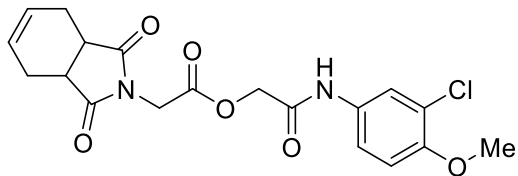

|                        |                      |                   |                                                                          |                        |                      |
|------------------------|----------------------|-------------------|--------------------------------------------------------------------------|------------------------|----------------------|
| Acquisition Time (sec) | 0.5505               | Comment           | Thiago - tss075 - DMSO - Av 500MHz - dez10tssC1                          | Date                   | 11 Dec 2012 10:28:48 |
| Date Stamp             | 11 Dec 2012 10:28:48 | File Name         | C:\USERS\RAFAEL\DESKTOP\ESPECTROS TSS\500 - 2012\DEZ10TSSC1\1\PDATA\111R |                        |                      |
| Frequency (MHz)        | 125.69               | Nucleus           | 13C                                                                      | Number of Transients   | 1600                 |
| Original Points Count  | 16384                | Owner             | nmr/su                                                                   | Points Count           | 32768                |
| Receiver Gain          | 2050.00              | SW(cyclical) (Hz) | 29761.90                                                                 | Solvent                | DMSO-d6              |
| Spectrum Type          | STANDARD             | Sweep Width (Hz)  | 29761.00                                                                 | Temperature (degree C) | 25.143               |
|                        |                      |                   |                                                                          | Spectrum Offset (Hz)   | 12508.7627           |

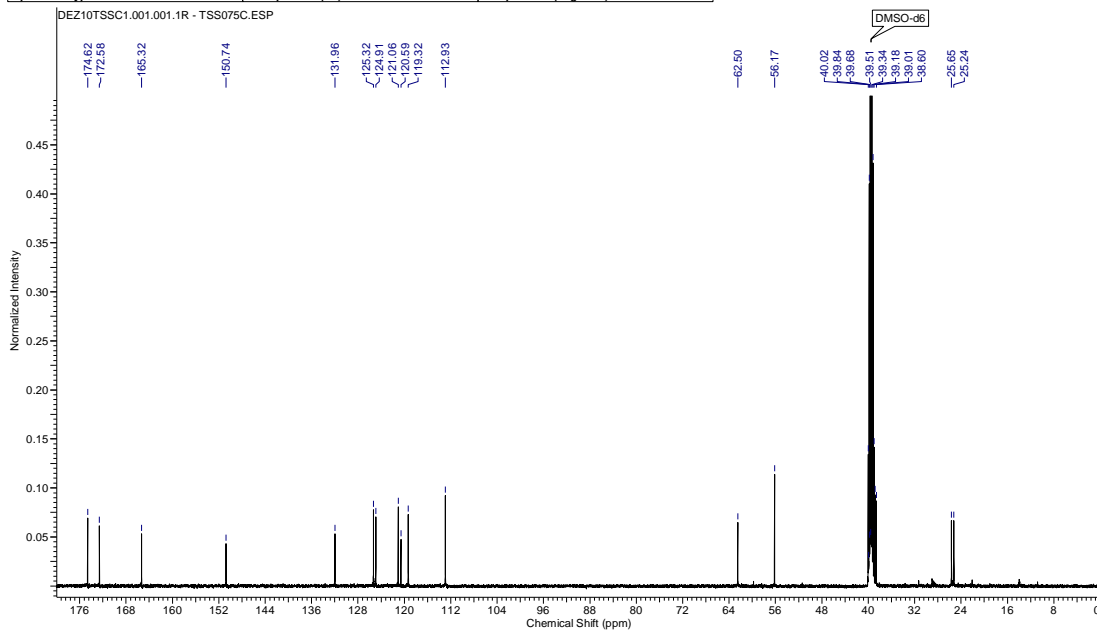

Figure S43  $^{13}\text{C}$  NMR spectrum of compound **10g** (62.5 MHz, DMSO).

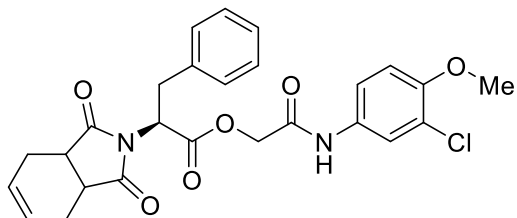

|                        |                                                                             |                      |                                  |                        |                      |
|------------------------|-----------------------------------------------------------------------------|----------------------|----------------------------------|------------------------|----------------------|
| Acquisition Time (sec) | 3.1654                                                                      | Comment              | ju08rafH1 - RAF 99 CDCl3 250 MHz | Date                   | 08 Jul 2016 15:55:24 |
| File Name              | C:\Users\Rafaell\Dropbox\Mestrado\Dissertação\RMN Dissert\ju08rafH1_001001r |                      |                                  | Frequency (MHz)        | 250.13               |
| Nucleus                | <sup>1</sup> H                                                              | Number of Transients | 16                               | Original Points Count  | 16384                |
| Pulse Sequence         | zg30                                                                        | Solvent              | CHLOROFORM-D                     | Sweep Width (Hz)       | 5175.98              |
|                        |                                                                             |                      |                                  | Points Count           | 32768                |
|                        |                                                                             |                      |                                  | Temperature (degree C) | 25.160               |

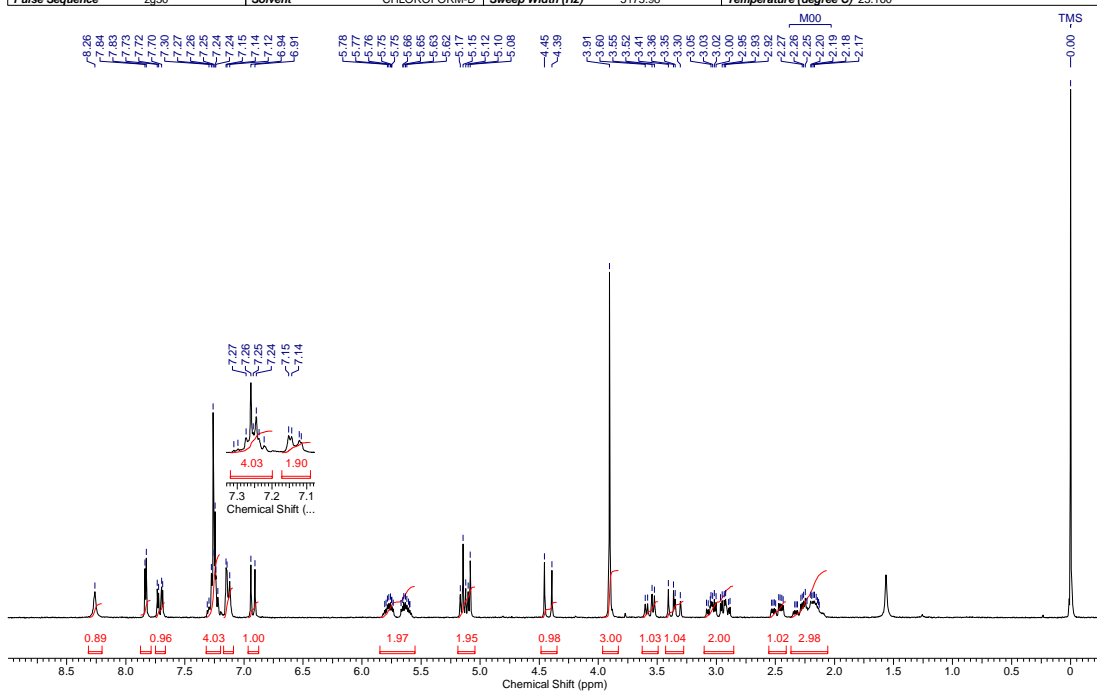

Figure S44 <sup>1</sup>H NMR spectrum of compound 10h (250 MHz, CDCl<sub>3</sub>).



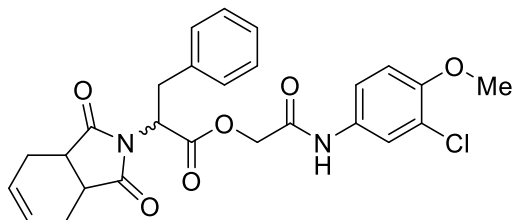

|                        |                                                           |                        |                                                             |                 |                      |
|------------------------|-----------------------------------------------------------|------------------------|-------------------------------------------------------------|-----------------|----------------------|
| Acquisition Time (sec) | 1.5903                                                    | Comment                | Rafael - RAF-111 - CDCl3 - Avance 500 MHz - set18rafH3 - 1H | Date            | 18 Sep 2015 15:41:22 |
| File Name              | E:\NMRN Dissert\500 MHz\Set 15\set18rafH3 RAF 111_001001r | Original Points Count  | 16384                                                       | Frequency (MHz) | 499.87               |
| Number of Transients   | 8                                                         | Points Count           | 65536                                                       | Nucleus         | 1H                   |
| Solvent                | CHLOROFORM-D                                              | Sweep Width (Hz)       | 10302.20                                                    | Pulse Sequence  | zg30                 |
|                        |                                                           | Temperature (degree C) | 25.163                                                      |                 |                      |

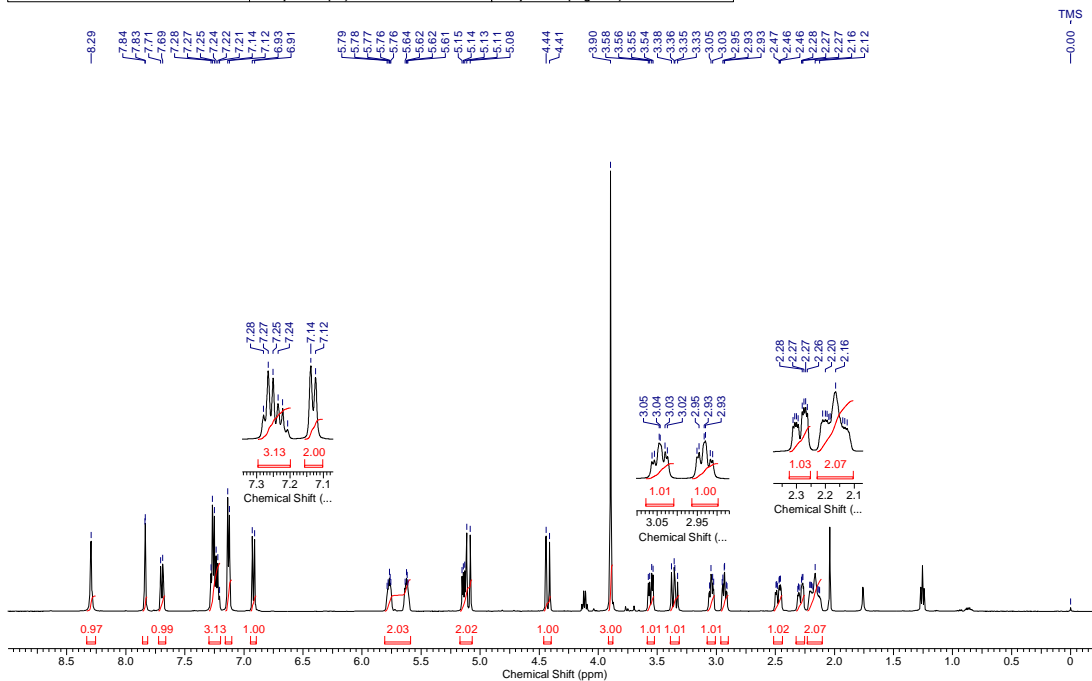

Figure S45 <sup>1</sup>H NMR spectrum of compound **10h<sub>rac</sub>** (500 MHz, CDCl<sub>3</sub>).

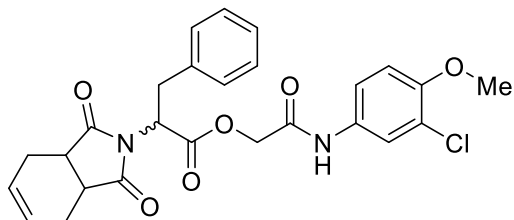

|                        |                                                          |                       |                                                                          |                        |                      |
|------------------------|----------------------------------------------------------|-----------------------|--------------------------------------------------------------------------|------------------------|----------------------|
| Acquisition Time (sec) | 0.4981                                                   | Comment               | Rafael - RAF-111 - CDCl3 - Avance 500 MHz - set18rafH3 - <sup>13</sup> C | Date                   | 18 Sep 2015 16:13:02 |
| File Name              | E:\RMN Dissert\500 MHz\Set 15\set18rafH3 RAF 111_002001r | Frequency (MHz)       | 125.69                                                                   | Nucleus                | <sup>13</sup> C      |
| Number of Transients   | 256                                                      | Original Points Count | 16384                                                                    | Points Count           | 32768                |
| Solvent                | CHLOROFORM-D                                             | Sweep Width (Hz)      | 32894.74                                                                 | Temperature (degree C) | 25.140               |

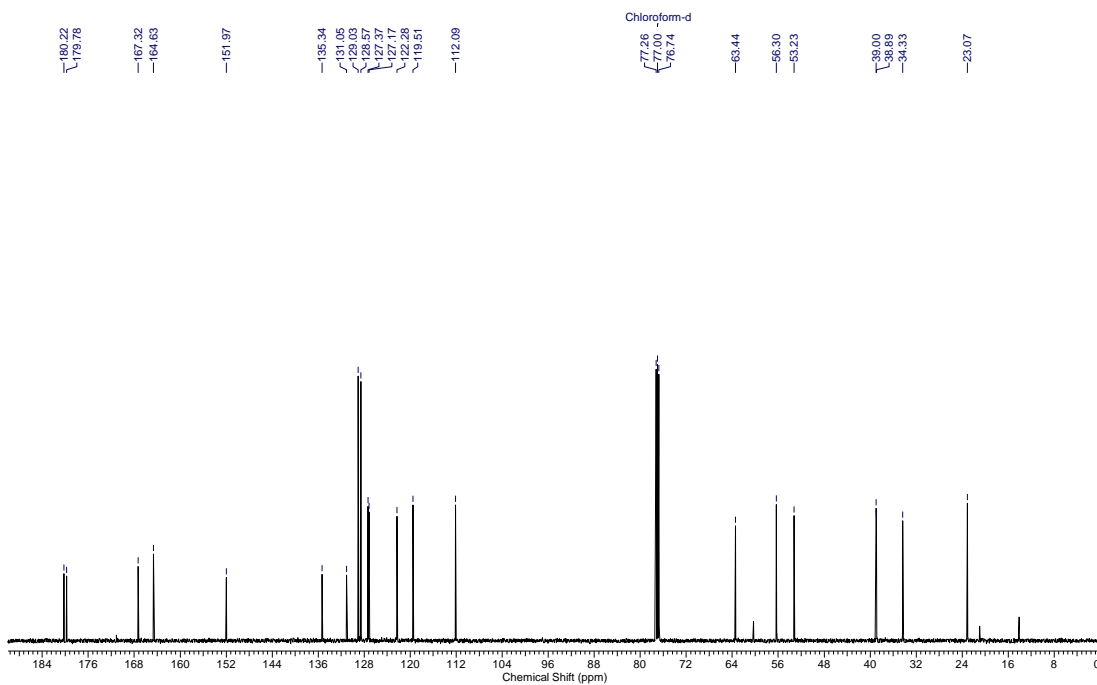

Figure S46 <sup>13</sup>C NMR spectrum of compound **10h<sub>rac</sub>** (125 MHz, CDCl<sub>3</sub>).



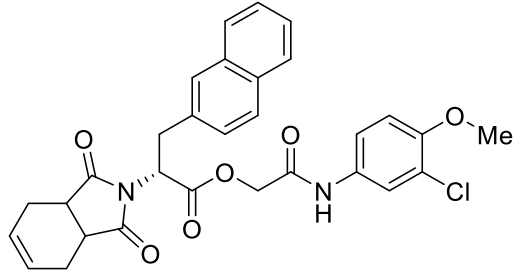

|                        |                                                          |                       |                                                         |                        |                      |
|------------------------|----------------------------------------------------------|-----------------------|---------------------------------------------------------|------------------------|----------------------|
| Acquisition Time (sec) | 0.6816                                                   | Comment               | Rafael - RAF - 110 - CDCl3 - Av 500MHz - set16rafH1 13C | Date                   | 16 Sep 2015 13:23:58 |
| File Name              | E:\RMN Dissert\400 MHz\Set 15\set16rafH1 RAF 110_002001r | Frequency (MHz)       | 100.63                                                  | Nucleus                | 13C                  |
| Number of Transients   | 5120                                                     | Original Points Count | 16384                                                   | Points Count           | 65536                |
| Solvent                | CHLOROFORM-D                                             | Sweep Width (Hz)      | 24038.46                                                | Temperature (degree C) | 25.160               |

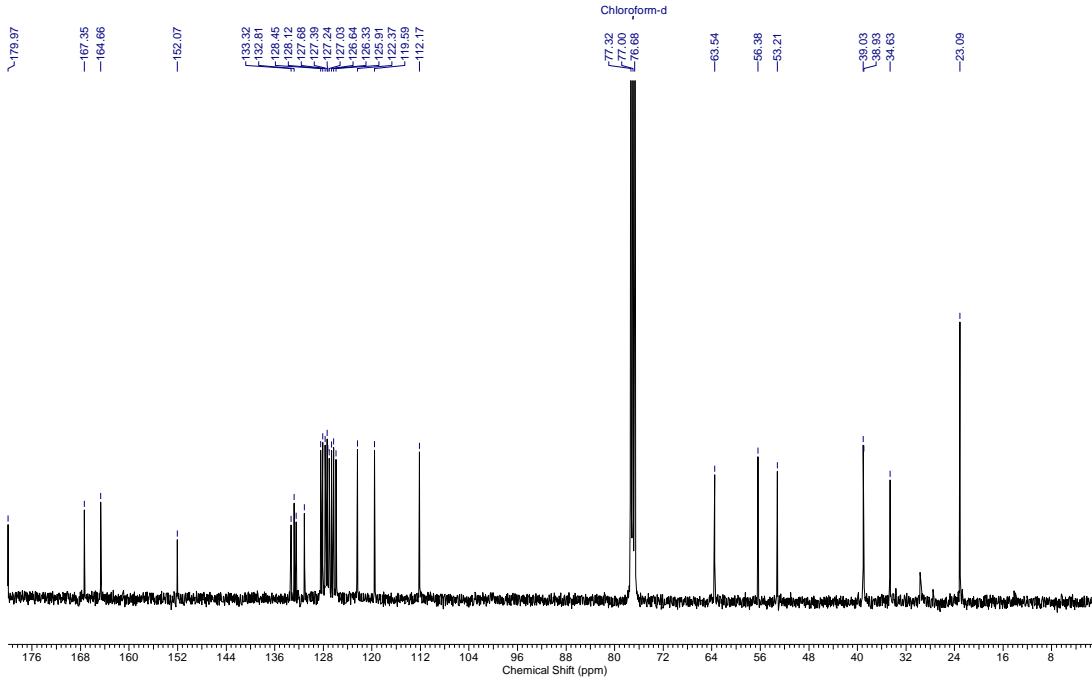

Figure S48  $^{13}\text{C}$  NMR spectrum of compound 10i (100 MHz,  $\text{CDCl}_3$ ).

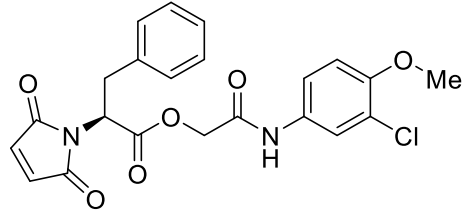

|                        |                                                          |                        |                                              |                 |                      |
|------------------------|----------------------------------------------------------|------------------------|----------------------------------------------|-----------------|----------------------|
| Acquisition Time (sec) | 1.3282                                                   | Comment                | Rafael "RAF-184" cdcl3/ AV600MHz_ abr12rafH2 | Date            | 13 Apr 2016 07:34:08 |
| File Name              | E:\RMN Dissert\600 MHz\Abr 16\abr12rafH2 RAF 184_001001r | Original Points Count  | 16384                                        | Frequency (MHz) | 600.17               |
| Number of Transients   | 16                                                       | Sweep Width (Hz)       | 12335.53                                     | Points Count    | 65536                |
| Solvent                | CHLOROFORM-D                                             | Temperature (degree C) | 24.477                                       | Pulse Sequence  | zg30                 |

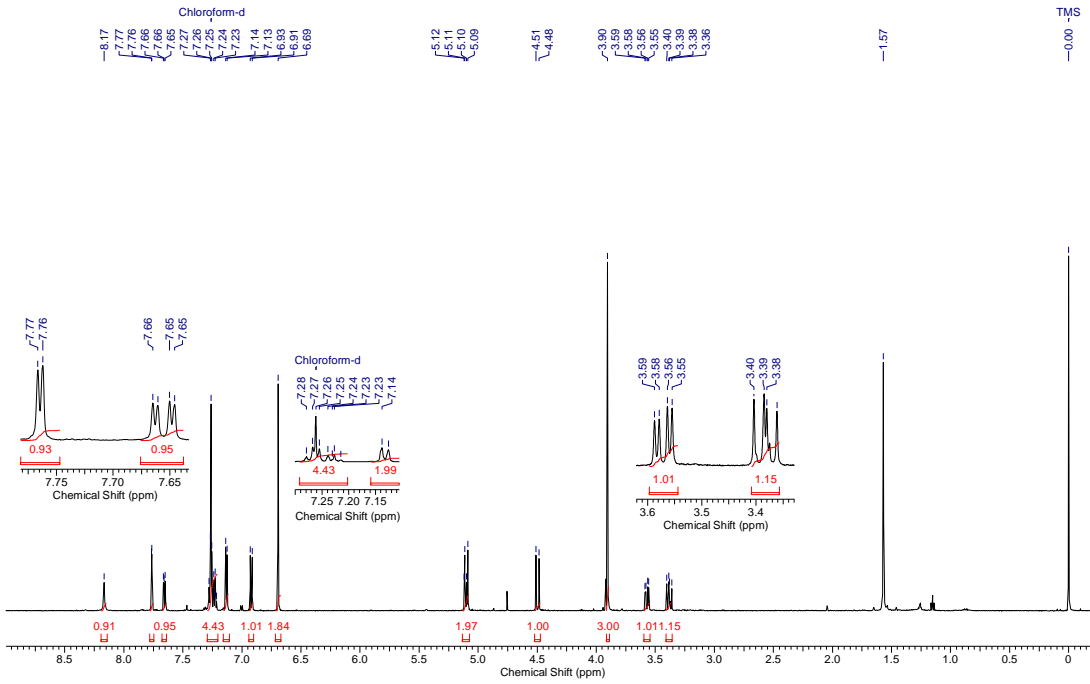

Figure S49 <sup>1</sup>H NMR spectrum of compound 10j (600 MHz, CDCl<sub>3</sub>).

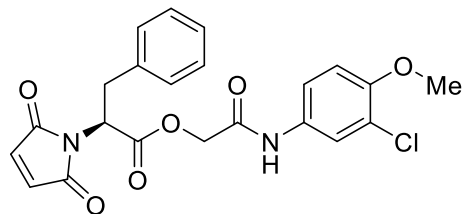

|                        |                                                          |                       |                                                    |                        |                      |
|------------------------|----------------------------------------------------------|-----------------------|----------------------------------------------------|------------------------|----------------------|
| Acquisition Time (sec) | 0.4020                                                   | Comment               | Rafael "RAF-184" cdcl3/ AV600MHz_ abr12rafH2 - 13C | Date                   | 13 Apr 2016 07:34:40 |
| File Name              | E:\RMN Dissert\600 MHz\Abr 16\abr12rafH2 RAF 184_002001r | Frequency (MHz)       | 150.91                                             | Nucleus                | 13C                  |
| Number of Transients   | 5120                                                     | Original Points Count | 16384                                              | Points Count           | 32768                |
| Solvent                | CHLOROFORM-D                                             | Sweep Width (Hz)      | 40760.87                                           | Temperature (degree C) | 24.476               |
|                        |                                                          |                       |                                                    | Pulse Sequence         | zgpg30               |

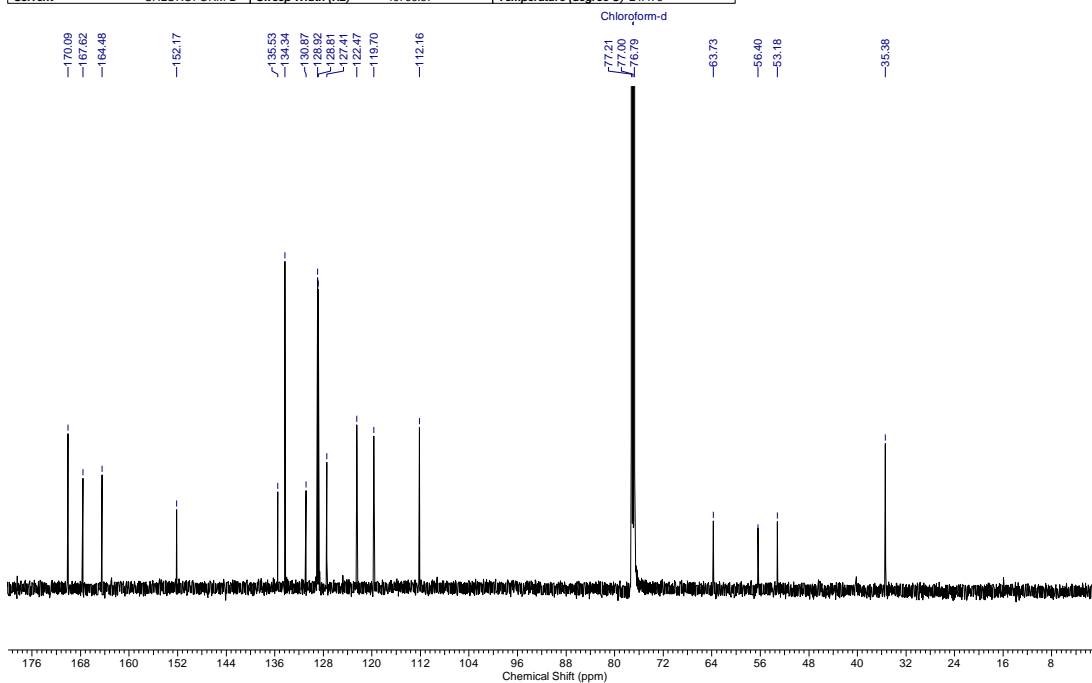

Figure S50  $^{13}\text{C}$  NMR spectrum of compound 10j (150 MHz,  $\text{CDCl}_3$ ).

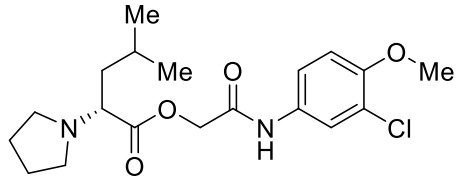

|                        |                                                          |                        |                                                             |                 |                      |
|------------------------|----------------------------------------------------------|------------------------|-------------------------------------------------------------|-----------------|----------------------|
| Acquisition Time (sec) | 1.5903                                                   | Comment                | Rafael - RAF-101 - CDCl3 - Avance 500 MHz - ago18rafH1 - 1H | Date            | 28 Aug 2015 12:56:44 |
| File Name              | E:\RMN Dissert\500 MHz\Ago 15\ago28rafH1 RAF 101_001001r | Original Points Count  | 16384                                                       | Frequency (MHz) | 499.87               |
| Number of Transients   | 4                                                        | Points Count           | 65536                                                       | Nucleus         | 1H                   |
| Solvent                | CHLOROFORM-D                                             | Sweep Width (Hz)       | 10302.20                                                    | Pulse Sequence  | zg30                 |
|                        |                                                          | Temperature (degree C) | 25.149                                                      |                 |                      |

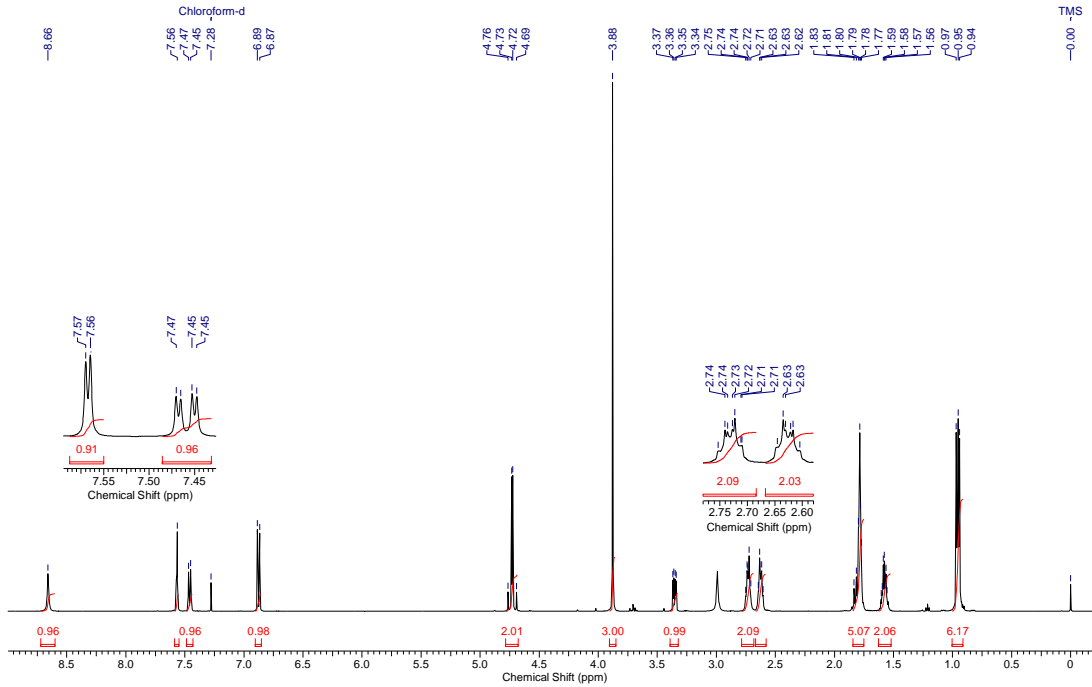

Figure S51 <sup>1</sup>H NMR spectrum of compound 10k (500 MHz, CDCl<sub>3</sub>).

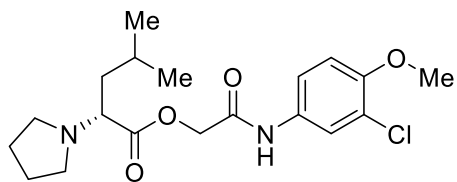

|                        |                                                          |                       |                                                                          |                        |                      |
|------------------------|----------------------------------------------------------|-----------------------|--------------------------------------------------------------------------|------------------------|----------------------|
| Acquisition Time (sec) | 0.4981                                                   | Comment               | Rafael - RAF-101 - CDCl3 - Avance 500 MHz - ago18rafH1 - <sup>13</sup> C | Date                   | 28 Aug 2015 12:56:54 |
| File Name              | E:\RMN Dissert\500 MHz\Ago 15\ago28rafH1 RAF 101_002001r | Frequency (MHz)       | 125.69                                                                   | Nucleus                | <sup>13</sup> C      |
| Number of Transients   | 36                                                       | Original Points Count | 16384                                                                    | Points Count           | 32768                |
| Solvent                | CHLOROFORM-D                                             | Sweep Width (Hz)      | 32894.74                                                                 | Temperature (degree C) | 25.215               |

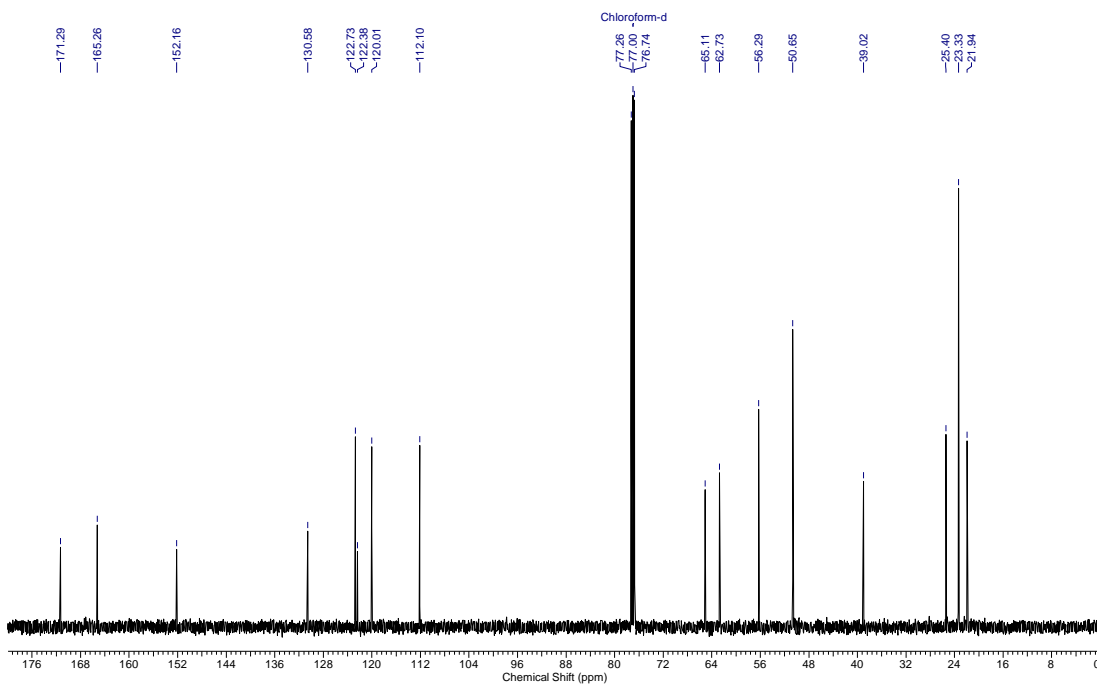

Figure S52 <sup>13</sup>C NMR spectrum of compound 10k (125 MHz, CDCl<sub>3</sub>).



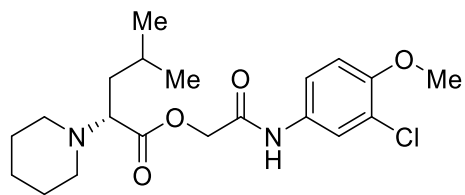

|                        |                                                          |                       |                                             |                        |                      |
|------------------------|----------------------------------------------------------|-----------------------|---------------------------------------------|------------------------|----------------------|
| Acquisition Time (sec) | 1.5903                                                   | Comment               | Rafael "RAF-115" cdcl3/ Av500MHz set22rafH1 | Date                   | 23 Sep 2015 07:46:54 |
| File Name              | E:\RMN Dissert\500 MHz\Set 15\set22rafH1 RAF 115_001001r | Frequency (MHz)       | 499.87                                      | Nucleus                | 1H                   |
| Number of Transients   | 16                                                       | Original Points Count | 16384                                       | Points Count           | 65536                |
| Solvent                | CHLOROFORM-D                                             | Sweep Width (Hz)      | 10302.20                                    | Temperature (degree C) | 25.147               |

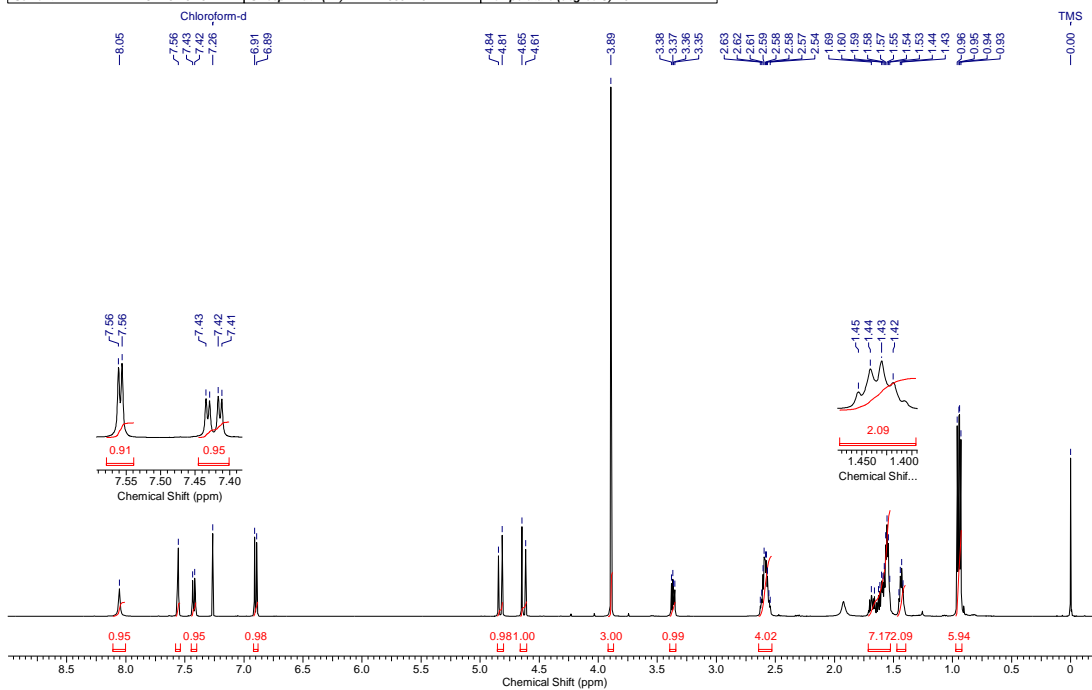

Figure S53 <sup>1</sup>H NMR spectrum of compound 10I (500 MHz, CDCl<sub>3</sub>).

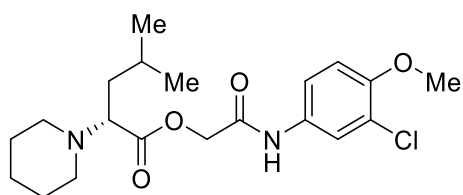

|                        |                                                          |                       |                                                   |                        |                      |
|------------------------|----------------------------------------------------------|-----------------------|---------------------------------------------------|------------------------|----------------------|
| Acquisition Time (sec) | 0.4981                                                   | Comment               | Rafael "RAF-115" cdcl3/ Av500MHz set22rafH1 - 13C | Date                   | 23 Sep 2015 07:46:40 |
| File Name              | E:\RMN Dissert\500 MHz\Set 15\set22rafH1 RAF 115_002001r | Frequency (MHz)       | 125.69                                            | Nucleus                | 13C                  |
| Number of Transients   | 1024                                                     | Original Points Count | 16384                                             | Points Count           | 32768                |
| Solvent                | CHLOROFORM-D                                             | Sweep Width (Hz)      | 32894.74                                          | Temperature (degree C) | 25.152               |

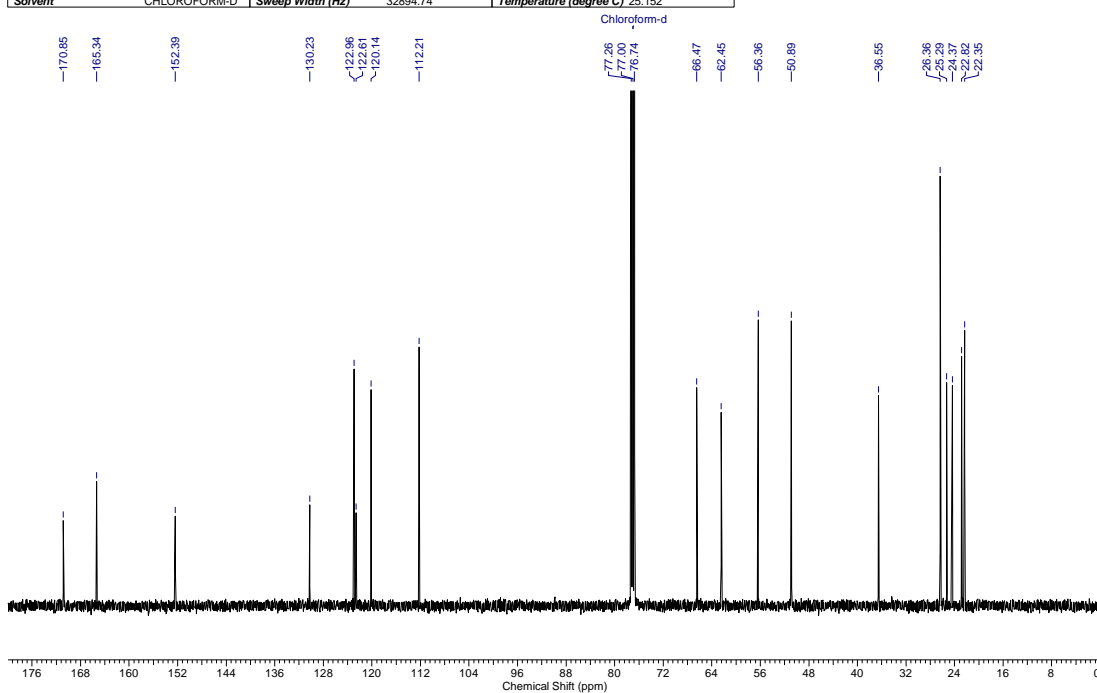

Figure S54  $^{13}\text{C}$  NMR spectrum of compound **10I** (125 MHz,  $\text{CDCl}_3$ ).

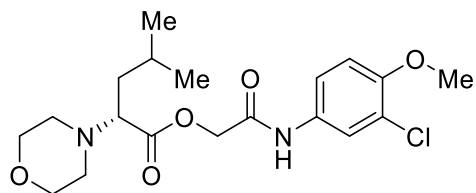

|                        |                                                          |                       |                                             |                        |                      |
|------------------------|----------------------------------------------------------|-----------------------|---------------------------------------------|------------------------|----------------------|
| Acquisition Time (sec) | 2.0447                                                   | Comment               | Rafael "RAF-128" cdcl3/ Av400MHz out19rafH1 | Date                   | 20 Oct 2015 06:38:32 |
| File Name              | E:\RMN Dissert\400 MHz\Out 15\out19rafH1 RAF 128_001001r | Frequency (MHz)       | 400.18                                      | Nucleus                | 1H                   |
| Number of Transients   | 16                                                       | Original Points Count | 16384                                       | Points Count           | 65536                |
| Solvent                | CHLOROFORM-D                                             | Sweep Width (Hz)      | 8012.82                                     | Pulse Sequence         | zg30                 |
|                        |                                                          |                       |                                             | Temperature (degree C) | 25.260               |

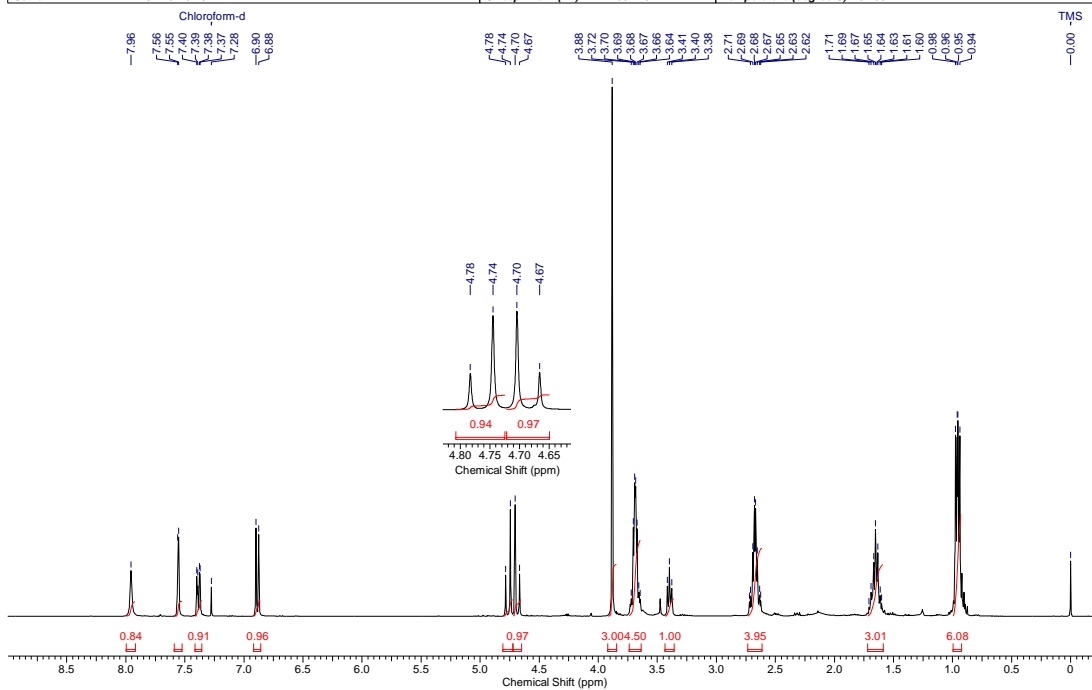

Figure S55  $^1\text{H}$  NMR spectrum of compound **10m** (400 MHz,  $\text{CDCl}_3$ ).

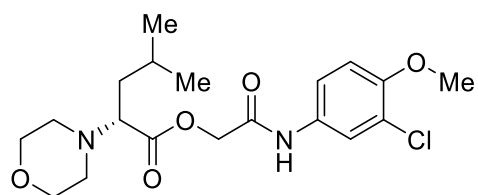

|                        |                                                          |                       |                                                   |                        |                      |
|------------------------|----------------------------------------------------------|-----------------------|---------------------------------------------------|------------------------|----------------------|
| Acquisition Time (sec) | 0.6816                                                   | Comment               | Rafael "RAF-128" cdcl3/ Av400MHz out19rafH1 - 13C | Date                   | 20 Oct 2015 06:38:26 |
| File Name              | E:\RMN Dissert\400 MHz\Out 15\out19rafH1 RAF 128_002001r | Frequency (MHz)       | 100.63                                            | Nucleus                | 13C                  |
| Number of Transients   | 1024                                                     | Original Points Count | 16384                                             | Points Count           | 65536                |
| Solvent                | CHLOROFORM-D                                             | Sweep Width (Hz)      | 24038.46                                          | Temperature (degree C) | 25.160               |

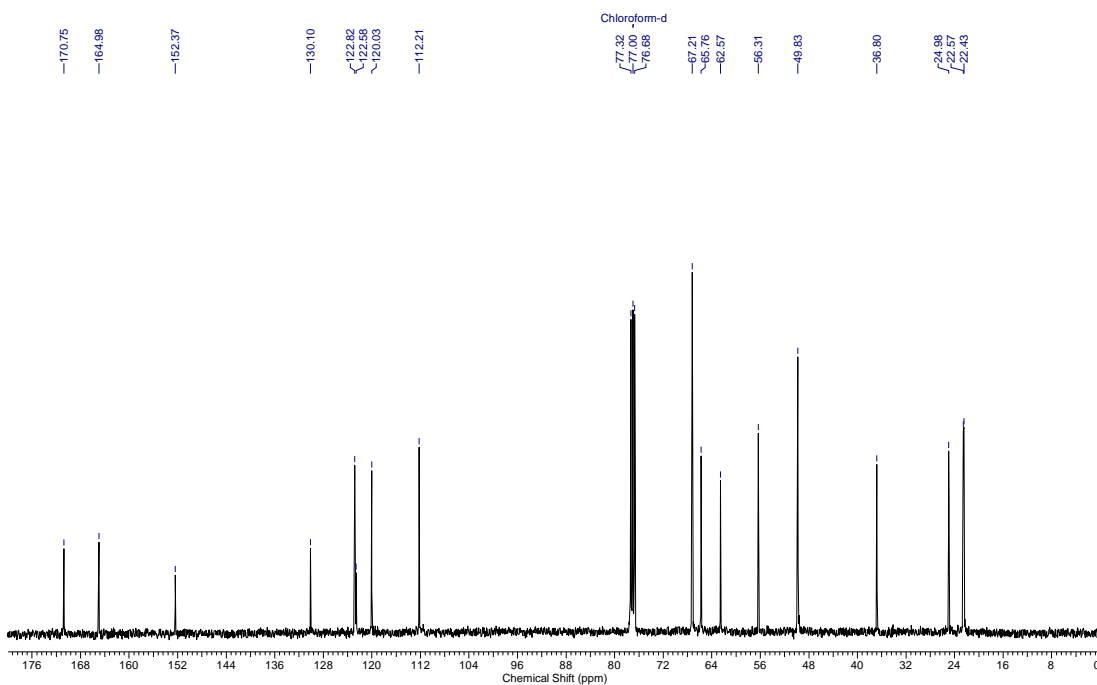

Figure S56  $^{13}\text{C}$  NMR spectrum of compound **10m** (100 MHz,  $\text{CDCl}_3$ ).

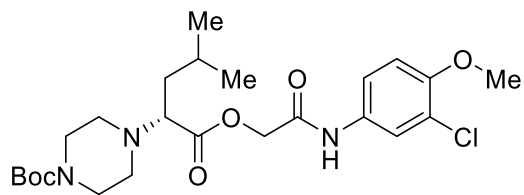

|                        |                                                          |                       |                                                   |                        |                      |
|------------------------|----------------------------------------------------------|-----------------------|---------------------------------------------------|------------------------|----------------------|
| Acquisition Time (sec) | 1.5903                                                   | Comment               | Rafael - RAF-132 - CDCl3 - Av.500MHz - out23rafH1 | Date                   | 15 Jul 2015 09:33:14 |
| File Name              | E:\RMN Dissert\500 MHz\Out 15\out23rafH1 RAF 132_001001r | Frequency (MHz)       | 499.87                                            | Nucleus                | 1H                   |
| Number of Transients   | 16                                                       | Original Points Count | 16384                                             | Points Count           | 65536                |
| Solvent                | CHLOROFORM-D                                             | Sweep Width (Hz)      | 10302.20                                          | Temperature (degree C) | 25.145               |

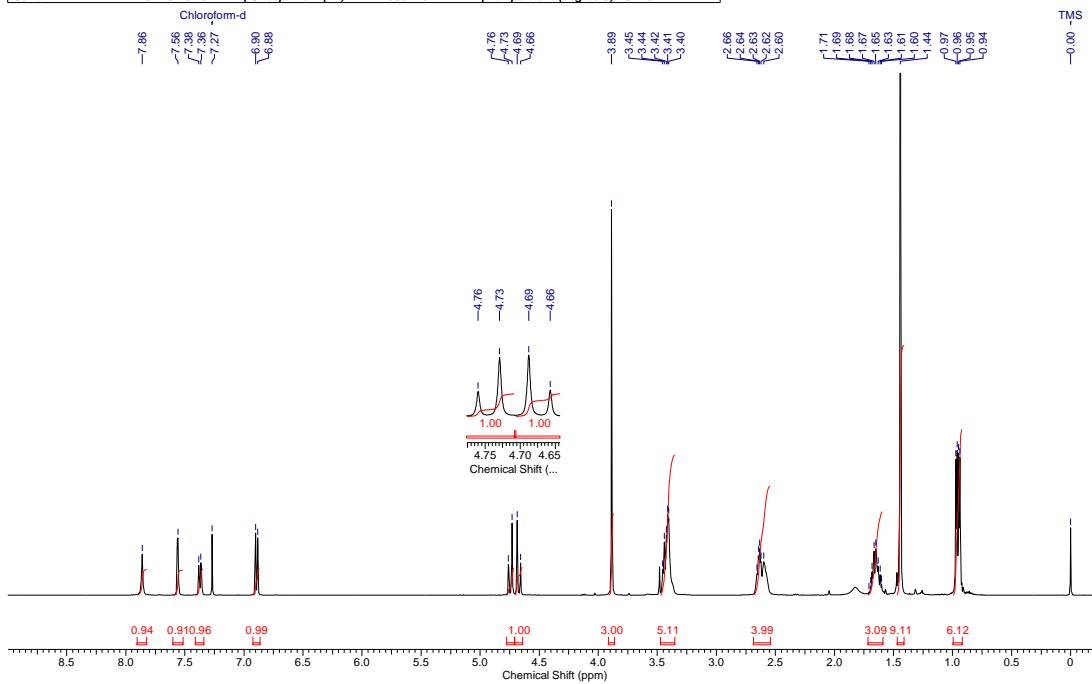

Figure S57 <sup>1</sup>H NMR spectrum of compound 10n (500 MHz, CDCl<sub>3</sub>).

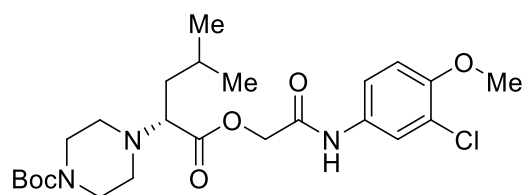

|                        |                                                          |                       |                                                       |                        |                      |
|------------------------|----------------------------------------------------------|-----------------------|-------------------------------------------------------|------------------------|----------------------|
| Acquisition Time (sec) | 0.4981                                                   | Comment               | Rafael - RAF-132-CDCl3 - Av.500MHz - out23rafC1 - 13C | Date                   | 15 Jul 2015 16:03:30 |
| File Name              | E:\RMN Dissert\500 MHz\Out 15\out23rafH1 RAF 132_002001r | Frequency (MHz)       | 125.69                                                | Nucleus                | 13C                  |
| Number of Transients   | 512                                                      | Original Points Count | 16384                                                 | Points Count           | 32768                |
| Solvent                | CHLOROFORM-D                                             | Sweep Width (Hz)      | 32894.74                                              | Temperature (degree C) | 25.150               |

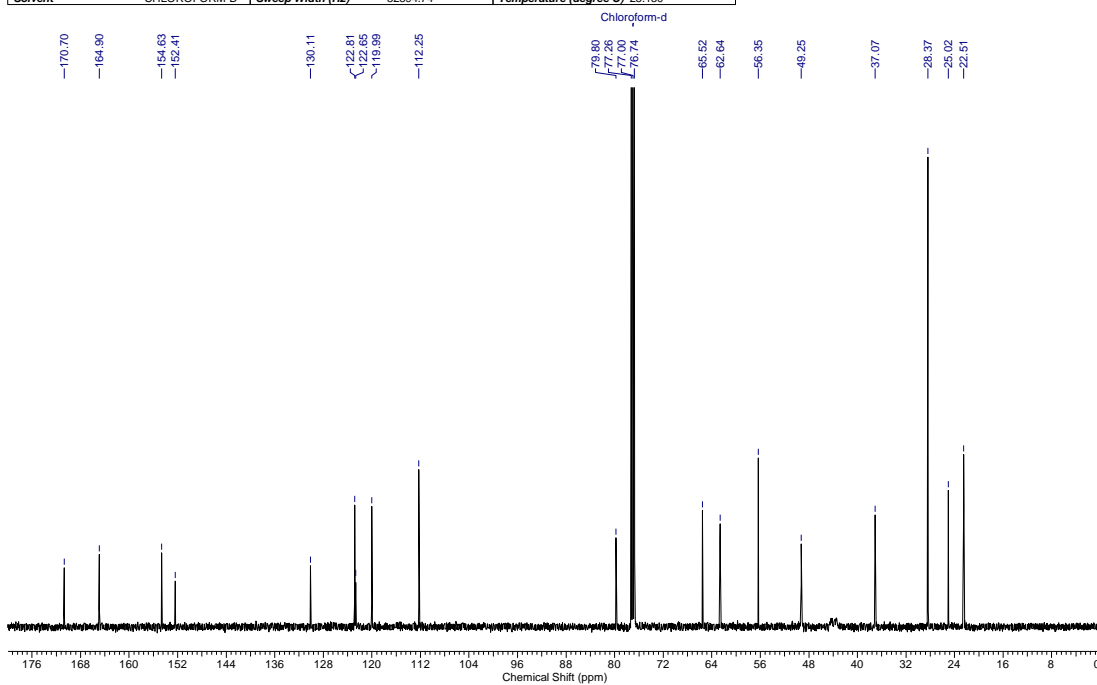

Figure S58  $^{13}\text{C}$  NMR spectrum of compound **10n** (125 MHz,  $\text{CDCl}_3$ ).

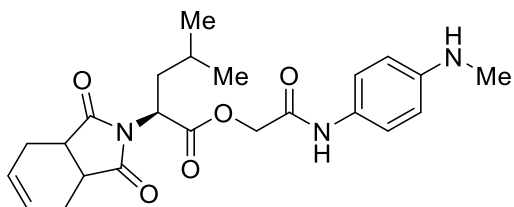

|                        |                                                            |                      |                                                  |                        |                      |
|------------------------|------------------------------------------------------------|----------------------|--------------------------------------------------|------------------------|----------------------|
| Acquisition Time (sec) | 1.6384                                                     | Comment              | Rafael - RAF-26 - CDCl3 - Av 500MHz - dez18rafH1 | Date                   | 19 Dec 2014 06:05:06 |
| File Name              | C:\UNICAMP\Mestrado\RMN500 MHz\2014\Dez\dez18rafH1_001001r |                      |                                                  | Frequency (MHz)        | 499.87               |
| Nucleus                | <sup>1</sup> H                                             | Number of Transients | 16                                               | Original Points Count  | 16384                |
| Pulse Sequence         | zg30                                                       | Solvent              | CHLOROFORM-D                                     | Sweep Width (Hz)       | 10000.00             |
|                        |                                                            |                      |                                                  | Points Count           | 65536                |
|                        |                                                            |                      |                                                  | Temperature (degree C) | 25.146               |

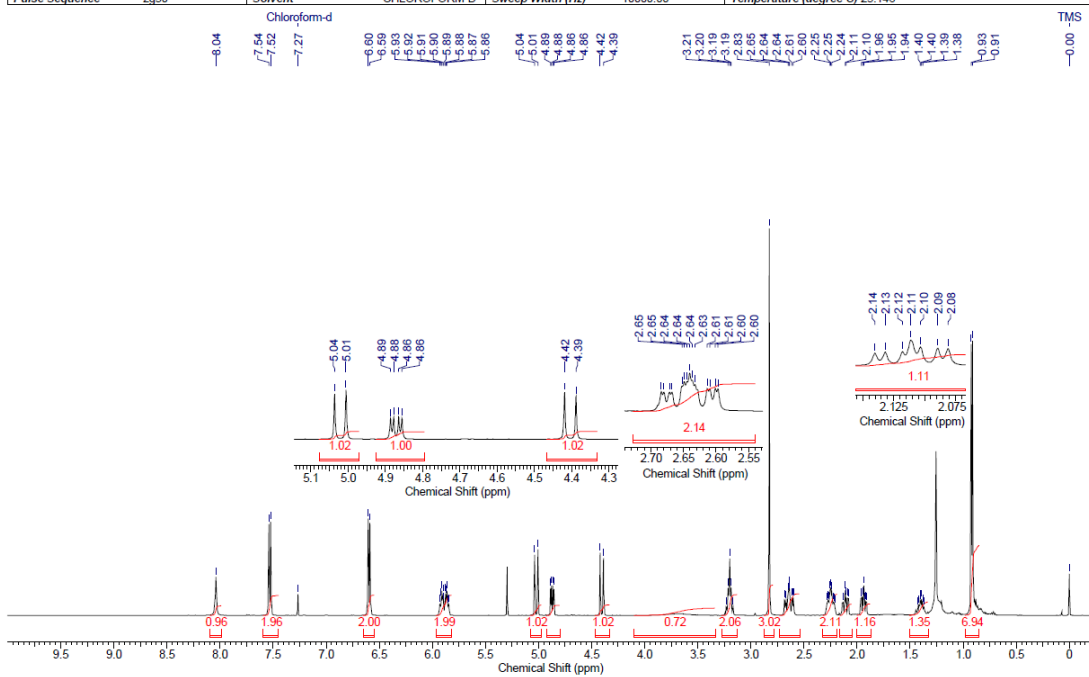

Figure S59 <sup>1</sup>H NMR spectrum of compound 3k' (500 MHz, CDCl<sub>3</sub>).

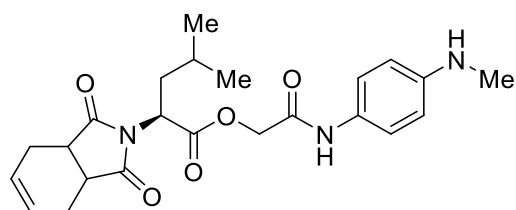

|                        |                                                            |                       |                                                      |                        |                      |
|------------------------|------------------------------------------------------------|-----------------------|------------------------------------------------------|------------------------|----------------------|
| Acquisition Time (sec) | 0.5505                                                     | Comment               | Rafael - RAF-26 - CDCl3 - Av 500MHz - dez18rafH1 13C | Date                   | 19 Dec 2014 06:05:20 |
| File Name              | C:\UNICAMP\Mestrado\RMN500 MHz\2014\Dez\dez18rafH1_002001f | Frequency (MHz)       | 125.69                                               | Nucleus                | 13C                  |
| Number of Transients   | 3072                                                       | Original Points Count | 16384                                                | Points Count           | 32768                |
| Solvent                | CHLOROFORM-D                                               | Sweep Width (Hz)      | 29761.90                                             | Temperature (degree C) | 25.150               |

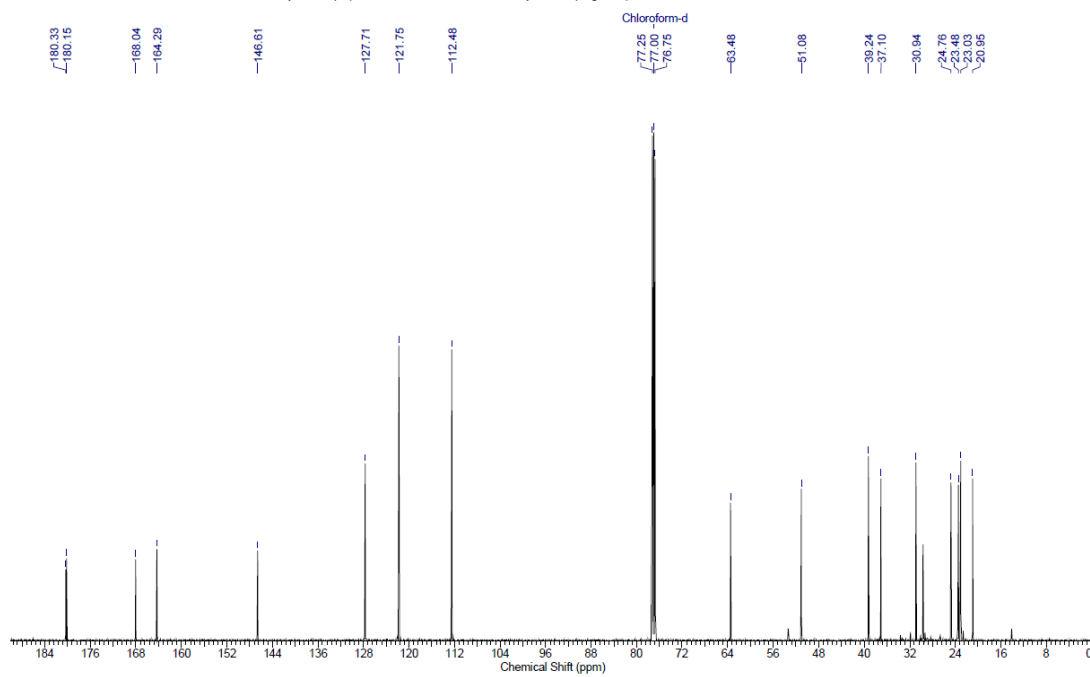

Figure S60 <sup>13</sup>C NMR spectrum of compound 3k' (125 MHz, CDCl<sub>3</sub>).



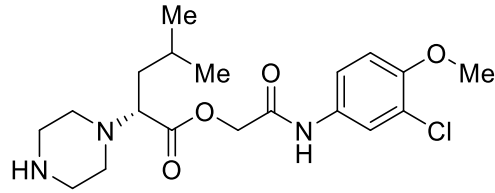

|                        |                                                          |                       |                                                            |                        |                      |
|------------------------|----------------------------------------------------------|-----------------------|------------------------------------------------------------|------------------------|----------------------|
| Acquisition Time (sec) | 1.5903                                                   | Comment               | Rafael - RAF 133 - MeOD - Avance 500 MHz - out26rafH2 - 1H | Date                   | 22 Aug 2015 19:29:56 |
| File Name              | E:\RMN Dissert\500 MHz\Out 15\out26rafH2 RAF 133_001001r | Frequency (MHz)       | 499.87                                                     | Nucleus                | 1H                   |
| Number of Transients   | 16                                                       | Original Points Count | 16384                                                      | Points Count           | 65536                |
| Solvent                | METHANOL-d4                                              | Spectrum Offset (Hz)  | 3067.9211                                                  | Sweep Width (Hz)       | 10302.20             |
|                        |                                                          |                       |                                                            | Temperature (degree C) | 50.712               |

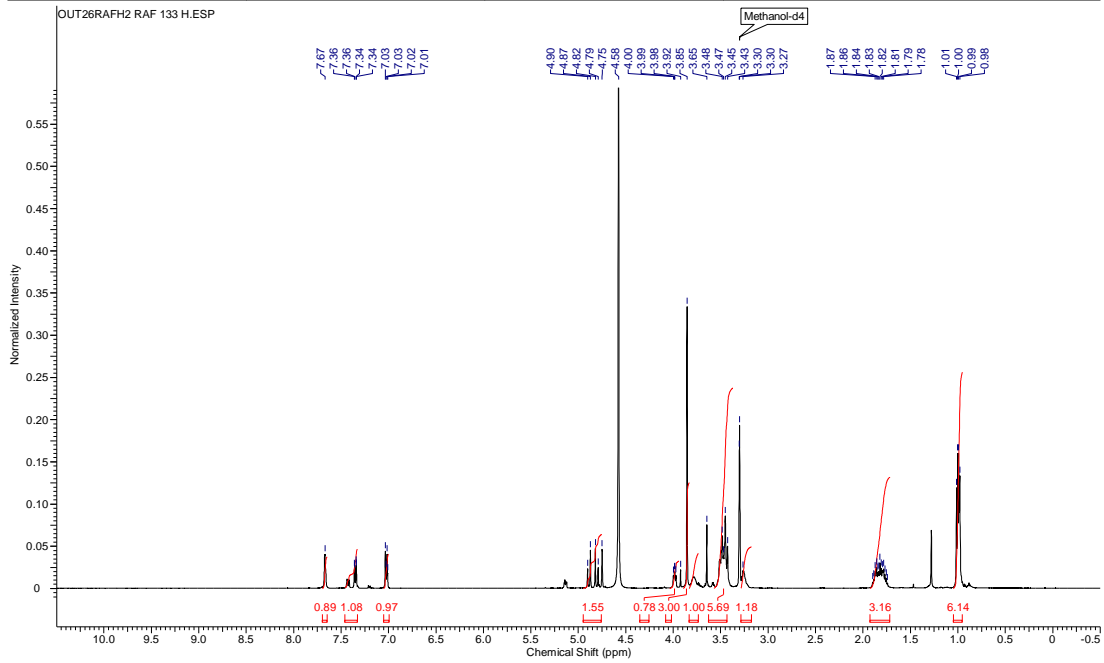

Figure S61 <sup>1</sup>H NMR spectrum of compound **10o** (500 MHz, MeOD).

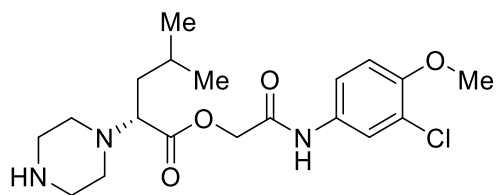

|                        |                      |                   |                                                                                                       |                        |                      |                      |            |
|------------------------|----------------------|-------------------|-------------------------------------------------------------------------------------------------------|------------------------|----------------------|----------------------|------------|
| Acquisition Time (sec) | 0.4981               | Comment           | Rafael - RAF 133 - MeOD - Avance 500 MHz - out26rafH2 - 13C 50 °C                                     | Date                   | 26 Oct 2015 14:29:52 |                      |            |
| Date Stamp             | 26 Oct 2015 14:29:52 | File Name         | C:\USERS\RAFAEL\DROPBOX\MESTRAD\DISSERTAÇÃO\IRMN DISSERT\500 MHz\OUT 15\OUT26RAF2 RAF 133\6\PDAT\111R |                        |                      |                      |            |
| Frequency (MHz)        | 125.69               | Nucleus           | 13C                                                                                                   | Number of Transients   | 3072                 |                      |            |
| Original Points Count  | 16384                | Owner             | nmsu                                                                                                  | Points Count           | 32768                |                      |            |
| Receiver Gain          | 2050.00              | SW(cyclical) (Hz) | 32894.74                                                                                              | Solvent                | METHANOL-d4          |                      |            |
| Spectrum Type          | STANDARD             | Sweep Width (Hz)  | 32893.73                                                                                              | Temperature (degree C) | 50.152               |                      |            |
|                        |                      |                   |                                                                                                       |                        | Origin               | spect                |            |
|                        |                      |                   |                                                                                                       |                        |                      | Pulse Sequence       | zgpg30     |
|                        |                      |                   |                                                                                                       |                        |                      | Spectrum Offset (Hz) | 14019.4951 |

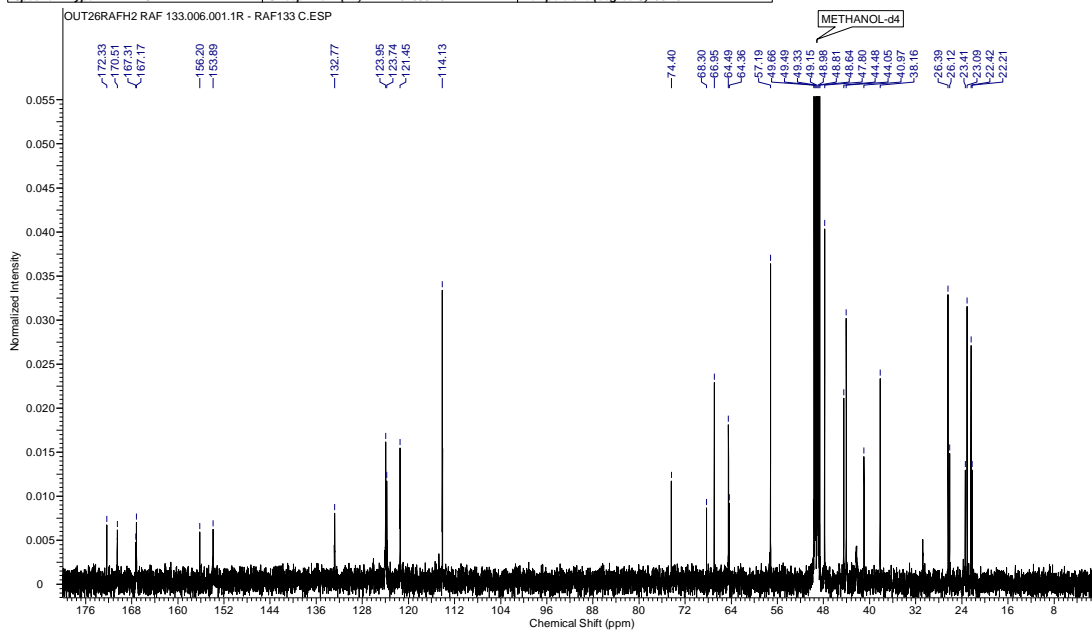

Figure S62  $^{13}\text{C}$  NMR spectrum of compound **10o** (125 MHz, MeOD).

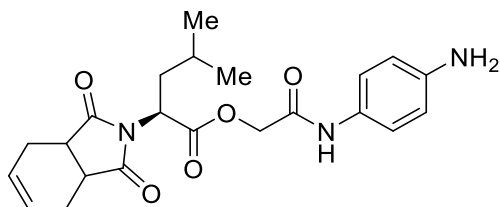

|                        |                                                             |                      |                                           |                        |                      |
|------------------------|-------------------------------------------------------------|----------------------|-------------------------------------------|------------------------|----------------------|
| Acquisition Time (sec) | 1.6384                                                      | Comment              | Rafael "RAF-39" cdc3/ Av500MHz jan20rafH1 | Date                   | 21 Jan 2015 06:05:32 |
| File Name              | C:\UNICAMP\Mestrado\RMN\500 MHz\2015\Jan\jan20rafH1_001001r |                      |                                           | Frequency (MHz)        | 499.87               |
| Nucleus                | <sup>1</sup> H                                              | Number of Transients | 16                                        | Original Points Count  | 16384                |
| Pulse Sequence         | zg30                                                        | Solvent              | CHLOROFORM-D                              | Sweep Width (Hz)       | 10000.00             |
|                        |                                                             |                      |                                           | Temperature (degree C) | 25.146               |

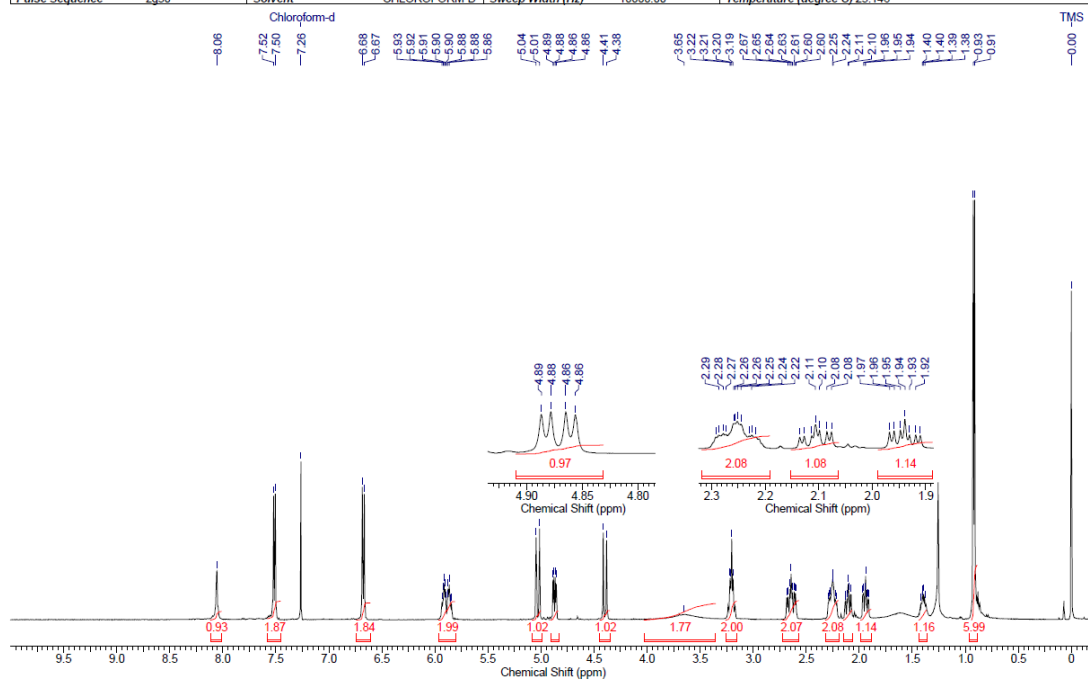

Figure S63 <sup>1</sup>H NMR spectrum of compound 3i' (500 MHz, CDCl<sub>3</sub>).

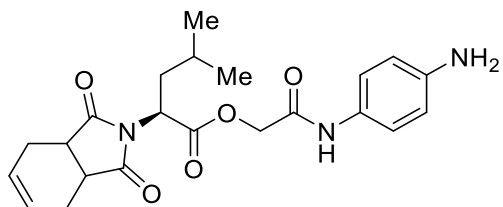

|                        |                                                             |                       |                                                    |                        |                      |
|------------------------|-------------------------------------------------------------|-----------------------|----------------------------------------------------|------------------------|----------------------|
| Acquisition Time (sec) | 0.5505                                                      | Comment               | Rafael "RAF-39" cdcl3/ Av:500MHz_jan20raffH1 - 13C | Date                   | 21 Jan 2015 06:05:40 |
| File Name              | C:\UNICAMP\Mestrado\RMN500 MHz\2015\Jan\jan20raffH1_0020011 | Frequency (MHz)       | 125.69                                             | Nucleus                | <sup>13</sup> C      |
| Number of Transients   | 3072                                                        | Original Points Count | 16384                                              | Points Count           | 32768                |
| Solvent                | CHLOROFORM-D                                                | Sweep Width (Hz)      | 29761.90                                           | Temperature (degree C) | 25.148               |
|                        |                                                             |                       |                                                    | Pulse Sequence         | zpgq30               |

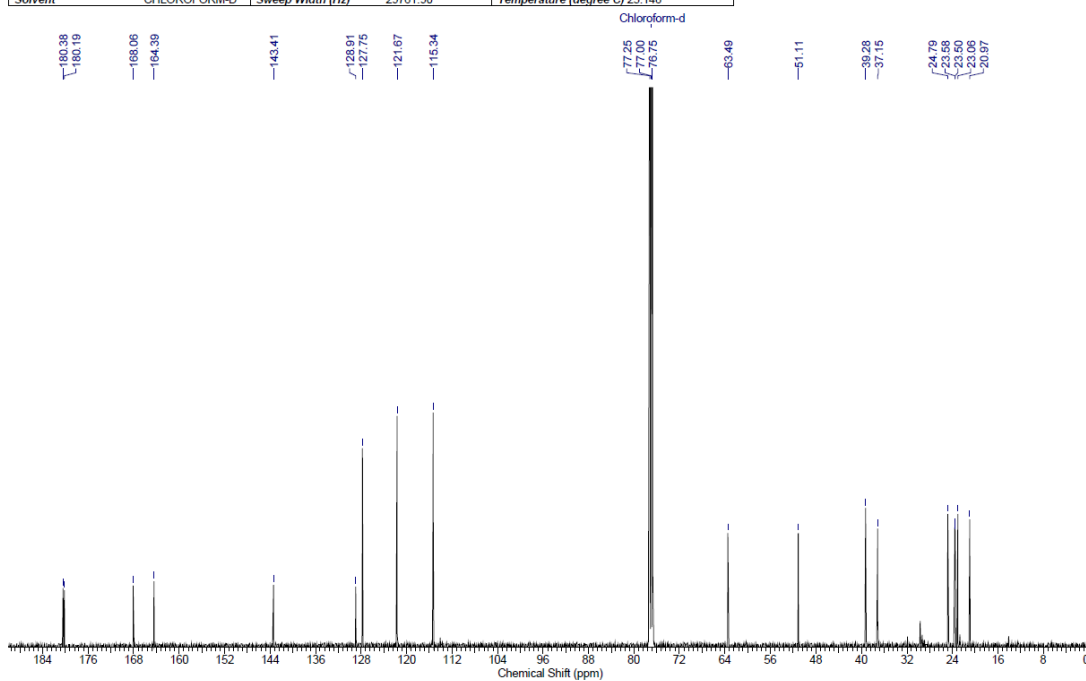

Figure S64 <sup>13</sup>C NMR spectrum of compound 3' (125 MHz, CDCl<sub>3</sub>).

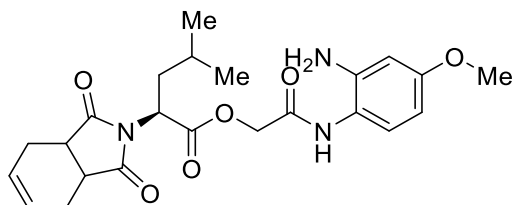

|                        |                                                               |                       |                                                                         |                        |                      |
|------------------------|---------------------------------------------------------------|-----------------------|-------------------------------------------------------------------------|------------------------|----------------------|
| Acquisition Time (sec) | 1.6384                                                        | Comment               | Rafael - RAF-53b - CDCl <sub>3</sub> - Avance 500 MHz - fev27rafH3 - 1H | Date                   | 27 Feb 2015 13:03:10 |
| File Name              | C:\UNICAMP\Mestrado\RMN\500 MHz\2015\Fev\fev27rafH3_001001.tr | Frequency (MHz)       | 499.87                                                                  | Nucleus                | <sup>1</sup> H       |
| Number of Transients   | 16                                                            | Original Points Count | 16384                                                                   | Points Count           | 65536                |
| Solvent                | CHLOROFORM-D                                                  | Sweep Width (Hz)      | 10000.00                                                                | Temperature (degree C) | 25.151               |

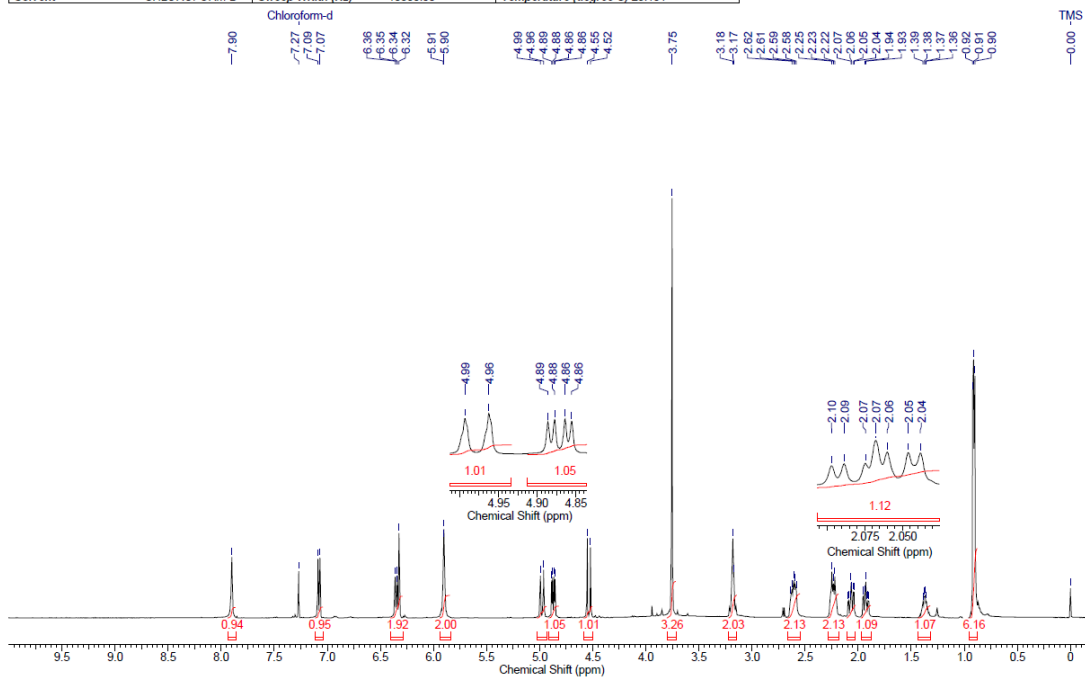

Figure S65 <sup>1</sup>H NMR spectrum of compound 3m' (500 MHz, CDCl<sub>3</sub>).

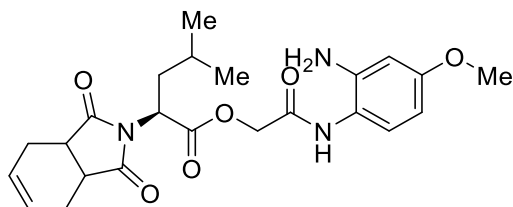

|                        |                                                        |                       |                                                             |                        |                      |
|------------------------|--------------------------------------------------------|-----------------------|-------------------------------------------------------------|------------------------|----------------------|
| Acquisition Time (sec) | 0.5505                                                 | Comment               | Rafael - RAF-53b - CDCl3 - Avance 500 MHz - fev27rafh3 - 1H | Date                   | 27 Feb 2015 13:18:18 |
| File Name              | C:\UNICAMP\Mestrado\RMN500 MHz\2015\fev27rafh3_002001r | Frequency (MHz)       | 125.69                                                      | Nucleus                | 13C                  |
| Number of Transients   | 128                                                    | Original Points Count | 16384                                                       | Points Count           | 32768                |
| Solvent                | CHLOROFORM-D                                           | Sweep Width (Hz)      | 29761.90                                                    | Temperature (degree C) | 25.167               |

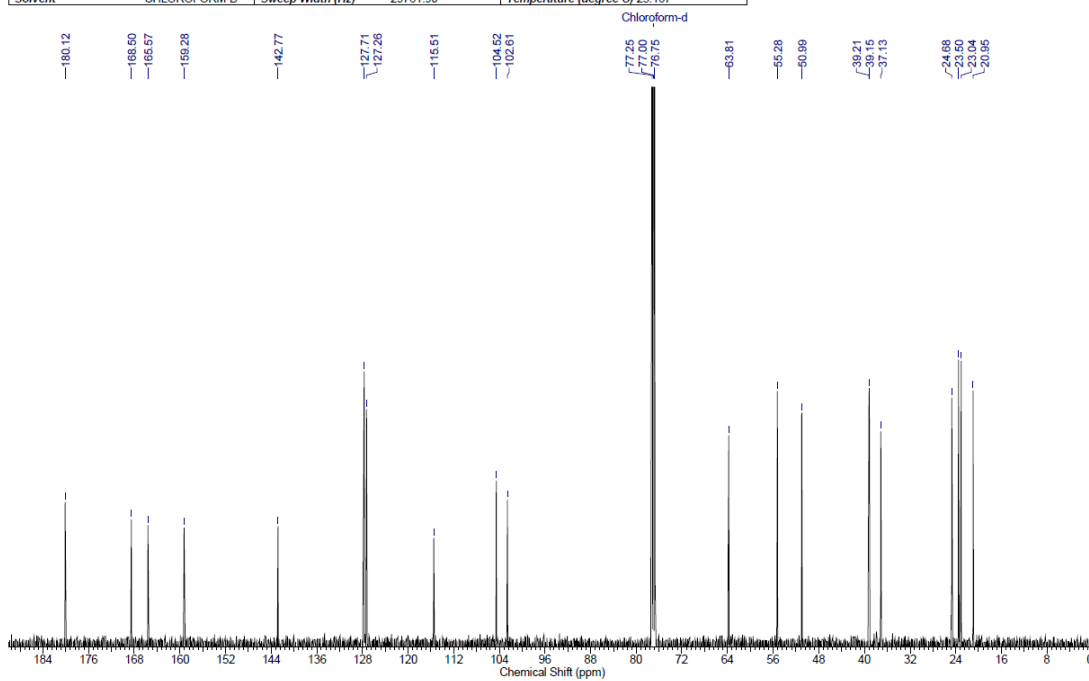

Figure S66 <sup>13</sup>C NMR spectrum of compound 3m' (125 MHz, CDCl<sub>3</sub>).

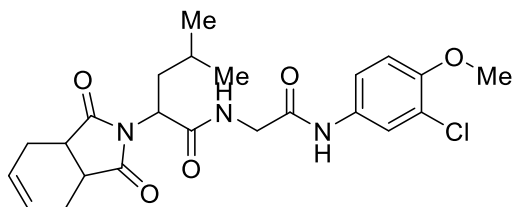

| Acquisition Time (sec) | 3.1654               | Comment           | Thiago DMSO_250MHz_TSS-037_set25ssH3                                   | Date                   | 25 Sep 2012 15:50:40 |
|------------------------|----------------------|-------------------|------------------------------------------------------------------------|------------------------|----------------------|
| Date Stamp             | 25 Sep 2012 15:50:40 | File Name         | C:\USERS\IRAFEL\DESKTOP\SPECTROS TSS\250 - 2012\SET25TSSH3\1\PDAT\111R |                        |                      |
| Frequency (MHz)        | 250.13               | Nucleus           | 1H                                                                     | Number of Transients   | 16                   |
| Original Points Count  | 16384                | Owner             | root                                                                   | Points Count           | 32768                |
| Receiver Gain          | 406.40               | SW(cyclical) (Hz) | 5175.98                                                                | Solvent                | DMSO-d6              |
| Spectrum Type          | STANDARD             | Sweep Width (Hz)  | 5175.83                                                                | Temperature (degree C) | 25.160               |
|                        |                      |                   |                                                                        | Spectrum Offset (Hz)   | 1755.9128            |

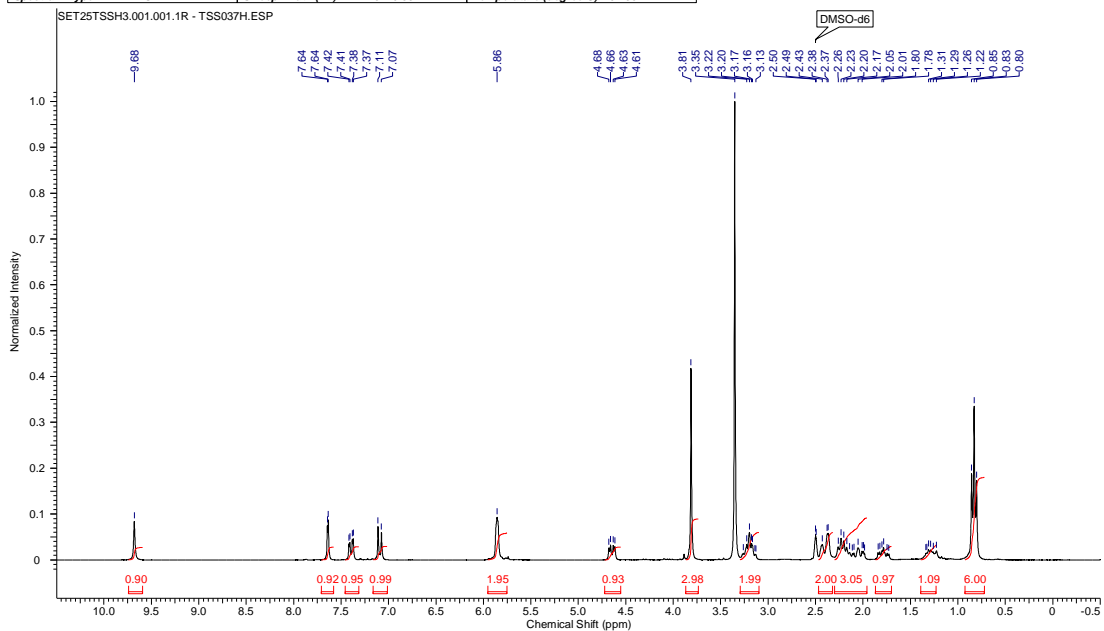

Figure S67  $^1\text{H}$  NMR spectrum of compound 5 (250 MHz, DMSO).



|                        |                      |                    |                                                                          |                        |                      |
|------------------------|----------------------|--------------------|--------------------------------------------------------------------------|------------------------|----------------------|
| Acquisition Time (sec) | 0.5439               | Comment            | Thiago, DMSO, 250MHz, TSS-037, set25tssC3                                | Date                   | 25 Sep 2012 16:07:44 |
| Date Stamp             | 25 Sep 2012 16:07:44 | File Name          | C:\USERS\IRAFEL\DESKTOP\ESPECTROS TSS\250 - 2012\SET25TSSC3\1\PDATA\111R |                        |                      |
| Frequency (MHz)        | 62.90                | Nucleus            | <sup>13</sup> C                                                          | Number of Transients   | 1024                 |
| Original Points Count  | 8192                 | Owner              | root                                                                     | Points Count           | 32768                |
| Receiver Gain          | 724.10               | SW (cyclical) (Hz) | 15060.24                                                                 | Solvent                | DMSO-d6              |
| Spectrum Type          | STANDARD             | Sweep Width (Hz)   | 15059.78                                                                 | Temperature (degree C) | 25.160               |
|                        |                      |                    |                                                                          | Spectrum Offset (Hz)   | 6262.6899            |

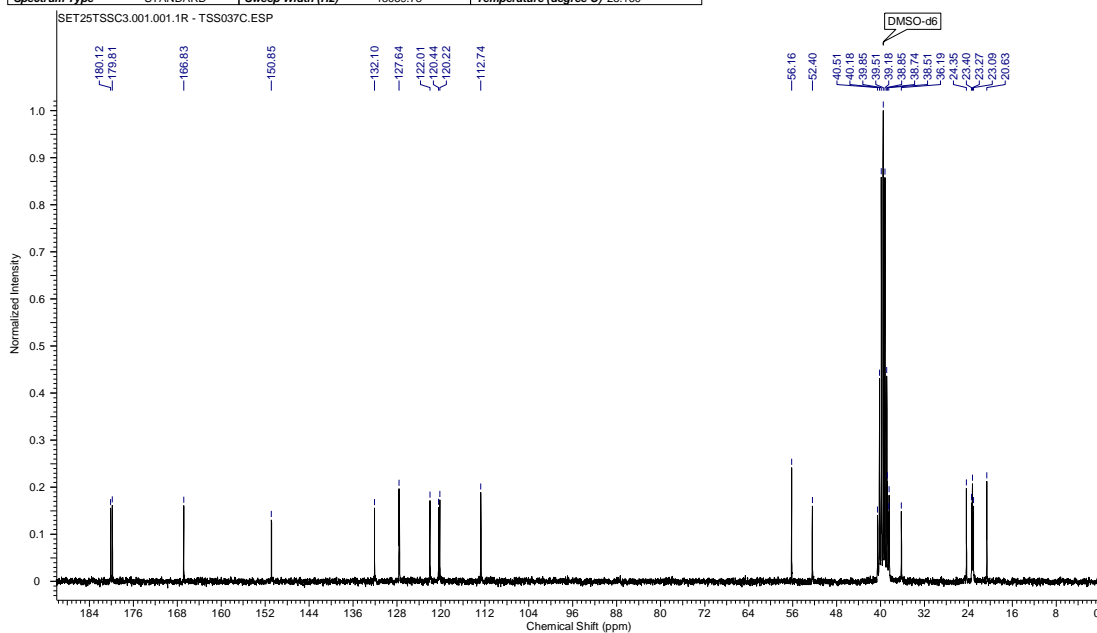

Figure S68 <sup>13</sup>C NMR spectrum of compound 5 (62.5 MHz, DMSO).



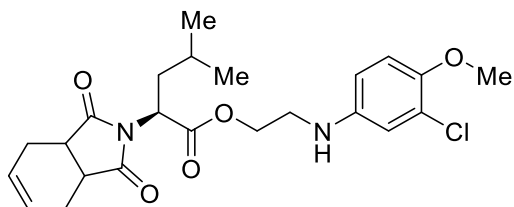

|                        |                                                          |                       |                                             |                        |                      |
|------------------------|----------------------------------------------------------|-----------------------|---------------------------------------------|------------------------|----------------------|
| Acquisition Time (sec) | 1.3282                                                   | Comment               | Rafael "RAF-151" cdc13/ Av600MHz dez03rafH1 | Date                   | 03 Dec 2015 16:33:46 |
| File Name              | E:\RMN Dissert\600 MHz\Dez 15\dez03rafH1 RAF 151_001001r | Frequency (MHz)       | 600.17                                      | Nucleus                | 1H                   |
| Number of Transients   | 16                                                       | Original Points Count | 16384                                       | Points Count           | 65536                |
| Solvent                | CHLOROFORM-D                                             | Sweep Width (Hz)      | 12335.53                                    | Temperature (degree C) | 25.155               |

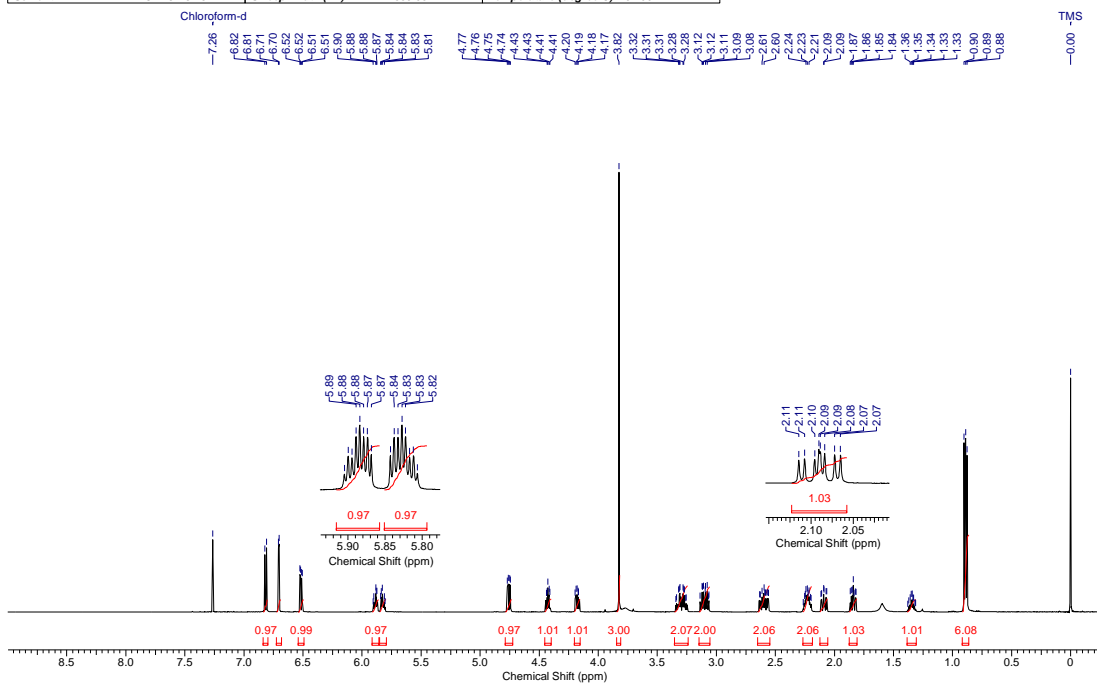

Figure S69 <sup>1</sup>H NMR spectrum of compound 7 (600 MHz, CDCl<sub>3</sub>).

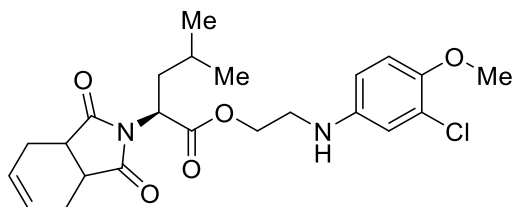

|                               |                                                          |                              |                                                   |                               |                      |
|-------------------------------|----------------------------------------------------------|------------------------------|---------------------------------------------------|-------------------------------|----------------------|
| <b>Acquisition Time (sec)</b> | 0.4544                                                   | <b>Comment</b>               | Rafael "RAF-151" cdcl3/ Av600MHz dez03rafH1 - 13C | <b>Date</b>                   | 03 Dec 2015 16:53:20 |
| <b>File Name</b>              | E:\RMN Dissert\600 MHz\Dez 15\dez03rafH1 RAF 151_002001r | <b>Frequency (MHz)</b>       | 150.91                                            | <b>Nucleus</b>                | 13C                  |
| <b>Number of Transients</b>   | 320                                                      | <b>Original Points Count</b> | 16384                                             | <b>Points Count</b>           | 32768                |
| <b>Solvent</b>                | CHLOROFORM-D                                             | <b>Sweep Width (Hz)</b>      | 36057.69                                          | <b>Temperature (degree C)</b> | 25.145               |
|                               |                                                          |                              |                                                   | <b>Pulse Sequence</b>         | zgpg30               |

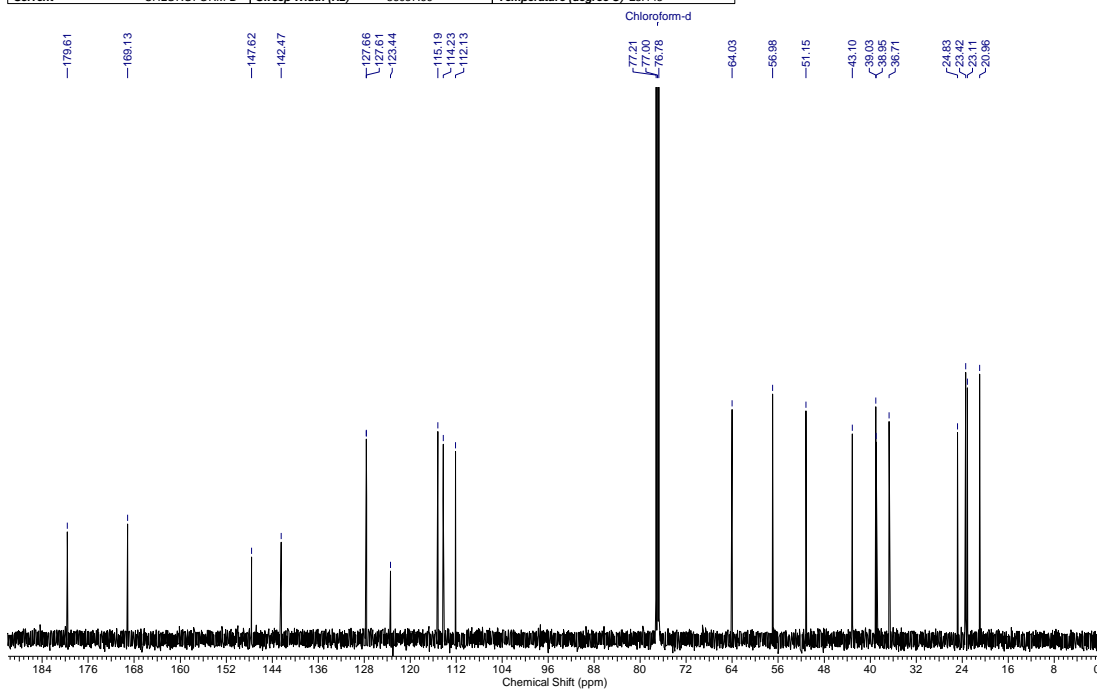

Figure S70  $^{13}\text{C}$  NMR spectrum of compound **7** (150 MHz,  $\text{CDCl}_3$ ).
